# Supplementary material for: Conversion of random X-inactivation to imprinted X-inactivation by maternal PRC2
Source: eLife. 2019 Apr 2;8:e44258. doi: 10.7554/eLife.44258 (PMC6541438; doi:10.7554/eLife.44258)
Supplement: Figure 2—source data 1. — Fluorescence intensity values for individual nuclei of each embryo plotted in Figure 2C. All nuclei from individual embryos were averaged to calculate the mean fluorescence intensity of each embryo. [file elife-44258-fig2-data1.xlsx]

## Sheet: Eed fl fl
Eedfl/fl 2-cell					Eedfl/fl ~4-cell (4-5 cells)					Eedfl/fl ~8-cell (6-10 cells)					Eedfl/fl ~16-cell (14-16 cells)					Note:	The software quantification of the embryos cannot always distinguish between two nuclei that are right next to eachother. Similarly, if a single nucleus is an odd shape, it may get counted as multiple nuclei by the software. This caused some embryos to have different numbers of nuclei listed than how many cells were actually in the embryo. If this is the case, the number of cells in that embryo i…
	DAPI	FITC	Cy3			DAPI	FITC	Cy3			DAPI	FITC	Cy3			DAPI	FITC	Cy3
	Embryo 1					Embryo 1					Embryo 1					Embryo 1 (16 cells)
Nucleus 1	8335.34	1181.3	703.365		Nucleus 1	2214.11	1467.36	1679.14		Nucleus 1	2590.5	785.39	680.21		Nucleus 1	4912.01	1110.29	632.542
Nucleus 2	8210.64	1111.84	1023.41		Nucleus 2	2294.06	1126.52	1568.07		Nucleus 2	2393.39	606.986	570.167		Nucleus 2	2926.74	869.211	1025.27
					Nucleus 3	2401.25	1461.85	1498.66		Nucleus 3	3555.14	536.244	92.3722		Nucleus 3	3666.5	737.475	551.487
	Embryo 2				Nucleus 4	2548.23	1519.68	1598.01		Nucleus 4	2235.62	997.36	851.384		Nucleus 4	3194.79	818.349	570.926
Nucleus 1	1431.16	1771.11	1326.71							Nucleus 5	2028.82	571.648	661.658		Nucleus 5	3139.23	595.433	697.129
Nucleus 2	1237.39	842.042	792.151			Embryo 2				Nucleus 6	2651.1	699.56	754.828		Nucleus 6	4844.21	1173.85	685.186
					Nucleus 1	1345.48	2118.57	1305.83		Nucleus 7	2123.92	410.452	201.598		Nucleus 7	3259.98	830.465	774.054
	Embryo 3				Nucleus 2	1307.11	2057.27	1609.97		Nucleus 8	2472.69	624.566	640.651		Nucleus 8	5877.01	803.804	328.589
Nucleus 1	1586.09	642.606	2024.34		Nucleus 3	1147.38	1818.59	1439.38							Nucleus 9	3415.65	817.842	805.146
Nucleus 2	1700.97	655.114	2098.31		Nucleus 4	1487.64	1803.1	1268.28			Embryo 2				Nucleus 10	2939.23	784.482	711.821
										Nucleus 1	3019.96	956.204	903.246		Nucleus 11	3872.48	668.203	800.358
	Embryo 4					Embryo 3 (5 cells)				Nucleus 2	2981.43	649.163	789.985		Nucleus 12	7018.77	338.181	85.8525
Nucleus 1	1588.99	744.645	1666.16		Nucleus 1	3299.27	1211.48	667.891		Nucleus 3	5016.4	962.617	560.244		Nucleus 13	3512.93	847.699	639.972
Nucleus 2	1370.74	490.66	1247.29		Nucleus 2	3306.12	893.053	536.453		Nucleus 4	2844.14	762.721	1097.55
					Nucleus 3	1826.3	788.937	286.605		Nucleus 5	2947.82	673.656	611.048			Embryo 2 (14 cells)
	Embryo 5				Nucleus 4	2872.71	1123.07	626.272		Nucleus 6	3198.37	835.131	873.635		Nucleus 1	3205.57	510.703	834.977
Nucleus 1	1547.69	642.674	1279.52		Nucleus 5	3460.95	805.395	429.354		Nucleus 7	3208.9	823.555	1003.13		Nucleus 2	3353.55	629.346	787.462
Nucleus 2	1556.69	712.712	1394.49							Nucleus 8	3553.32	756.412	768.283		Nucleus 3	4000.63	507.319	485.244
						Embryo 4 (4 cells)									Nucleus 4	3725.11	609.008	1263.05
	Embryo 6				Nucleus 1	1445.36	872.763	579.471			Embryo 3				Nucleus 5	3600.7	441.623	807.451
Nucleus 1	1333.26	961.08	998.125		Nucleus 2	1346.15	512.278	358.326		Nucleus 1	2562.98	1246.27	706.006		Nucleus 6	3676.31	394.217	764.142
Nucleus 2	1294.42	938.341	894.235		Nucleus 3	1243.28	651.836	506.262		Nucleus 2	2379.35	627.053	723.624		Nucleus 7	3740.66	487.838	549.067
										Nucleus 3	2798.4	897.267	649.393		Nucleus 8	3957.47	334.326	486.014
	Embryo 7					Embryo 5 (4 cells)				Nucleus 4	2798.05	634.041	621.593		Nucleus 9	3488.86	408.688	638.517
Nucleus 1	1457.99	411.605	685.639		Nucleus 1	1989.11	1246.89	909.034		Nucleus 5	2599.39	1108.51	713.744		Nucleus 10	3535.75	339.135	599.684
Nucleus 2	1321.06	378.396	670.519		Nucleus 2	2328.67	1723.78	1293.97		Nucleus 6	2565.17	703.903	925.314		Nucleus 11	3822.85	652.242	906.058
										Nucleus 7	2563.42	748.071	801.374		Nucleus 12	6483.02	366.356	496.641
	Embryo 8					Embryo 6				Nucleus 8	2958.96	798.17	867.067		Nucleus 13	5575.39	388.911	305.977
Nucleus 1	1308.16	1421.98	1852.18		Nucleus 1	1832.09	745.741	749.496		Nucleus 9	2341.11	769.05	726.705
Nucleus 2	1267.89	1541.54	1858.73		Nucleus 2	1993.63	764.304	745.2		Nucleus 10	2441.74	778.851	789.993			Embryo 3 (16 cells)
					Nucleus 3	1863.62	755.991	736.911							Nucleus 1	2440.25	319.944	502.472
	Embryo 9				Nucleus 4	2074.93	616.185	619.543			Embryo 4				Nucleus 2	2341.29	205.827	409.486
Nucleus 1	1160.38	1445.65	1452.8							Nucleus 1	1887.49	808.408	819.622		Nucleus 3	2679.45	177.148	415.383
Nucleus 2	1274.02	1314.03	1428.86							Nucleus 2	2303.81	635.335	721.814		Nucleus 4	2169.17	314.799	508.802
										Nucleus 3	1845.09	592.643	639.882		Nucleus 5	2090.53	188.078	559.115
	Embryo 10									Nucleus 4	2436.92	651.787	740.453		Nucleus 6	2548.69	279.58	585.392
Nucleus 1	1555.28	675.426	652.743							Nucleus 5	2632.16	149.769	287.531		Nucleus 7	2104.56	224.181	446.118
Nucleus 2	1047.05	1017.87	1281.6							Nucleus 6	2339.88	536.263	665.76		Nucleus 8	2461.35	369.366	460.833
										Nucleus 7	1829.21	591.585	637.341		Nucleus 9	2363.57	393.715	590.416
	Embryo 11									Nucleus 8	2269.08	548.742	559.798		Nucleus 10	2634.83	273.698	328.79
Nucleus 1	1263.22	1203.68	1594.24												Nucleus 11	2280	290.086	640.646
Nucleus 2	1039.35	945.029	1482.91								Embryo 5
										Nucleus 1	1727.65	719.156	603.921			Embryo 4 (16 cells)
	Embryo 12									Nucleus 2	1727.99	720.792	744.736		Nucleus 1	2214.75	457.902	537.837
Nucleus 1	3151.49	2276.2	2874.53							Nucleus 3	1824.01	616.325	422.506		Nucleus 2	2292.74	452.085	605.329
Nucleus 2	3311.55	2031.35	2732.01							Nucleus 4	1893.23	719.872	719.708		Nucleus 3	2483.37	399.593	321.666
										Nucleus 5	1963.48	753.22	652.268		Nucleus 4	2087.18	393.694	630.623
										Nucleus 6	1956.87	628.896	661.276		Nucleus 5	2422.58	346.706	402.5
										Nucleus 7	1643.37	572.833	700.233		Nucleus 6	2176.9	433.271	666.742
										Nucleus 8	2013.17	801.496	637.537		Nucleus 7	2521.15	403.501	592.764
															Nucleus 8	2299.76	285.628	557.965
											Embryo 6				Nucleus 9	2060.57	45.302	52.5184
										Nucleus 1	1915.97	993.851	820.751		Nucleus 10	2322.35	452.017	675.782
										Nucleus 2	1495.59	545.769	400.385		Nucleus 11	2164.63	435.501	615.593
										Nucleus 3	2028.11	960.189	752.138
										Nucleus 4	1838.84	856.144	657.216			Embryo 5 (16 cells)
										Nucleus 5	1824.7	893.528	746.448		Nucleus 1	3012.16	934.464	560.33
										Nucleus 6	1721	800.662	722.258		Nucleus 2	3712.55	634.82	361.212
										Nucleus 7	1427.08	565.755	399.138		Nucleus 3	3267.6	716.811	626.275
										Nucleus 8	1817.48	870.888	704.009		Nucleus 4	3205.21	527.525	581.68
															Nucleus 5	3981.24	856.347	948.202
											Embryo 7 (7 cells)				Nucleus 6	2792.91	710.779	838.092
										Nucleus 1	1541.62	757.772	731.611		Nucleus 7	3605.74	797.135	552.627
										Nucleus 2	1490.89	683.647	721.727		Nucleus 8	3883.65	559.874	420.838
										Nucleus 3	1723.47	731.8	806.137		Nucleus 9	3551.06	615.684	638.684
										Nucleus 4	1680.55	579.768	675.939		Nucleus 10	3144.6	660.416	808.836
										Nucleus 5	1499.49	777.599	711.987		Nucleus 11	2880.57	741.254	506.891
										Nucleus 6	1525.11	537.38	532.246		Nucleus 12	3332.12	785.276	773.327
															Nucleus 13	3237.88	856.779	623.065
											Embryo 8
										Nucleus 1	1934.93	519.757	360.236			Embryo 6 (15 cells)
										Nucleus 2	2086.52	527.704	449.287		Nucleus 1	1770	543.778	401.258
										Nucleus 3	2556.1	492.508	383.461		Nucleus 2	1548.44	511.224	352.48
										Nucleus 4	2250.51	601.155	314.783		Nucleus 3	1741.01	548.295	417.462
										Nucleus 5	1845.49	332.617	363.999		Nucleus 4	1867.08	574.691	355.325
										Nucleus 6	2091.41	394.082	327.601		Nucleus 5	1926.27	465.5	380.535
										Nucleus 7	2253.91	537.186	419.246		Nucleus 6	1700.2	529.316	343.427
										Nucleus 8	1944.95	323.199	324.612		Nucleus 7	1883.52	290.408	185.943
															Nucleus 8	1761.86	343.057	175.532
											Embryo 9 (8 cells)				Nucleus 9	1832.36	655.795	371.201
										Nucleus 1	1702.38	646.375	641.851		Nucleus 10	1721.52	477.369	293.591
										Nucleus 2	1750	590.5	658.598		Nucleus 11	1811.84	474.061	304.426
										Nucleus 3	1782.36	562.194	538.38		Nucleus 12	1875.48	562.595	362.092
										Nucleus 4	1939.25	573.726	672.094		Nucleus 13	1679.87	508.49	285.08
										Nucleus 5	1779.19	238.195	188.884		Nucleus 14	1550.54	510.862	186.217
										Nucleus 6	1770.35	681.884	629.021		Nucleus 15	1791.74	421.231	186.554
										Nucleus 7	1316.96	287.283	208.146		Nucleus 16	1874.39	449.41	400.265
										Nucleus 8	1678.14	572.159	603.306		Nucleus 17	1647.48	495.626	302.506
										Nucleus 9	1642.86	551.492	598.181
											Embryo 10
										Nucleus 1	1748.89	645.933	477.62
										Nucleus 2	1737.37	678.761	432.774
										Nucleus 3	1666.28	578.93	376.258
										Nucleus 4	1870.02	465.859	427.655
										Nucleus 5	1897.18	525.865	436.152
										Nucleus 6	2074.73	172.569	167.848
										Nucleus 7	2106.75	612.638	458.442
										Nucleus 8	1689.87	487.947	435.867
											Embryo 11
										Nucleus 1	1628.22	533.462	460.77
										Nucleus 2	2344.41	155.369	259.578
										Nucleus 3	1647	509.171	490.72
										Nucleus 4	1455.19	415.227	419.232
										Nucleus 5	1609.93	404.466	388.433
										Nucleus 6	1538.94	521.321	544.074
										Nucleus 7	1124.47	379.9	324.598
										Nucleus 8	1440.24	371.39	437.27
										Nucleus 9	1357.25	187.682	145.526
										Nucleus 10	1257.21	356.714	277.793
											Embryo 12
										Nucleus 1	1673.73	329.459	418.843
										Nucleus 2	1897.15	290.5	264.812
										Nucleus 3	1956.56	317.053	333.609
										Nucleus 4	1825.64	283.09	317.824
										Nucleus 5	1719.65	391.933	348.886
										Nucleus 6	1783.19	240.684	251.882
										Nucleus 7	1964.15	339.959	374.457
										Nucleus 8	1804.74	387.587	361.932
											Embryo 13
										Nucleus 1	1798.79	416.474	339.827
										Nucleus 2	1549.08	766.674	559.52
										Nucleus 3	1393.17	573.721	374.941
										Nucleus 4	1399.07	770.119	653.28
										Nucleus 5	1311.23	724.344	646.116
										Nucleus 6	1625.01	225.985	239.089
											Embryo 14 (8 cells)
										Nucleus 1	1627.12	387.469	319.051
										Nucleus 2	1908.37	444.269	364.562
										Nucleus 3	1868.22	403.128	287.503
										Nucleus 4	1448.27	451.5	392.874
											Embryo 15
										Nucleus 1	1733.1	562.265	519.346
										Nucleus 2	1737.45	612.738	611.62
										Nucleus 3	1676.37	628.585	581.807
										Nucleus 4	1654.6	537.84	450.144
										Nucleus 5	2178.89	221.341	96.5318
										Nucleus 6	1779.55	568.8	490.753
										Nucleus 7	1598.48	466.026	479.273
										Nucleus 8	1750.73	660.257	494.677
										Nucleus 9	1819.96	490.893	458.334
										Nucleus 10	1842.44	504.694	436.734
											Embryo 16
										Nucleus 1	1555.18	452.574	387.782
										Nucleus 2	1676.99	458.094	409.782
										Nucleus 3	1733.06	393.798	454.074
										Nucleus 4	1394.35	403.12	414.862
										Nucleus 5	1286.93	274.378	199.508
										Nucleus 6	1630.92	437.793	404.721
										Nucleus 7	1825.18	397.896	452.238
										Nucleus 8	1681.73	332.209	391.317
											Embryo 17 (7 cells)
										Nucleus 1	1857.78	446.658	453.742
										Nucleus 2	1811.93	442.565	556.079
										Nucleus 3	1812.85	430.792	516.386
										Nucleus 4	1805.58	403.625	455.065
										Nucleus 5	1505.44	268.652	228.571
										Nucleus 6	1530.52	210.626	180.582
										Nucleus 7	1857.12	467.815	470.807
										Nucleus 8	2375.68	349.657	294.315

## Sheet: Eed het or null
Eedfl/- or Eed-/- 2-cell					Eedfl/- or Eed-/- ~4-cell (4-5 cells)					Eedfl/- or Eed-/- ~8-cell (6-9 cells)					Eedfl/- 16-cell					Eed-/- ~16-cell (14-16 cells)
	DAPI	FITC	Cy3			DAPI	FITC	Cy3			DAPI	FITC	Cy3			DAPI	FITC	Cy3			DAPI	FITC	Cy3
	Embryo 1					Embryo 1 (5 cell)					Embryo 1 (7 cell)					Embryo 1 (16 cell)					Embryo 1 (16 cell)
Nucleus 1	1735.14	1386.4	1452.2		Nucleus 1	2384	1847.16	622.898		Nucleus 1	4693.74	687.147	8.59334		Nucleus 1	3172.88	921.422	656.438		Nucleus 1	2781.14	589.185	667.68
Nucleus 2	1921.9	1606.87	2339.14		Nucleus 2	2257.7	1903.85	518.763		Nucleus 2	2285.17	1376.67	943.417		Nucleus 2	3167.57	917.985	805.923		Nucleus 2	2603.03	556.622	609.819
					Nucleus 3	6548.86	347.522	258.161		Nucleus 3	2242.1	1284.23	819.266		Nucleus 3	3135.4	849.92	751.291		Nucleus 3	2638.56	412.323	520.284
	Embryo 2				Nucleus 4	2803.4	2083.56	673.667		Nucleus 4	2489.71	1066.47	958.374		Nucleus 4	2841.02	572.335	508.275		Nucleus 4	2785.74	465.564	112.9
Nucleus 1	2375.6	2296.57	2823.57		Nucleus 5	2773.93	1719.56	885.658		Nucleus 5	2366.44	1418.54	818.3		Nucleus 5	3152.98	840.404	963.903		Nucleus 5	2823.37	346.632	385.307
Nucleus 2	1869	545.579	120.9		Nucleus 6	2740.09	2036.39	500.715		Nucleus 6	2006.48	1277.66	1056.97		Nucleus 6	3093.77	791.522	922.159		Nucleus 6	3270.68	694.93	88.9614
										Nucleus 7	2111.89	1310.79	918.034		Nucleus 7	3056.24	979.289	529.875		Nucleus 7	2161.43	188.773	85.2707
	Embryo 3					Embryo 2				Nucleus 8	1891.73	1354.37	788.301		Nucleus 8	3208.62	895.279	830.915		Nucleus 8	3072.45	410.768	0
Nucleus 1	3744.59	532.366	38.8976		Nucleus 1	1228.01	810.352	510.077							Nucleus 9	3661.8	638.245	1027.51
Nucleus 2	2256.2	869.991	777.744		Nucleus 2	1376.51	647.982	360.872			Embryo 2 (8 cell)				Nucleus 10	2792.6	947.017	699.413			Embryo 2 (16 cell)
					Nucleus 3	1314.92	796.739	360.957		Nucleus 1	1669.97	266.945	146.621		Nucleus 11	2960.83	1027.26	983.499		Nucleus 1	2503.24	438.771	78.7201
	Embryo 4				Nucleus 4	1307.57	650.945	467.474		Nucleus 2	1657.32	182.529	107.695		Nucleus 12	3750.85	435.958	648.439		Nucleus 2	2407.93	527.075	240.026
Nucleus 1	2263.22	1720.33	2503.78							Nucleus 3	1561.69	229.705	103.858		Nucleus 13	3414.09	508.03	658.852		Nucleus 3	2646.9	267.04	14.58
Nucleus 2	2052.47	1192.37	2854.9			Embryo 3				Nucleus 4	2089.24	130.788	183.586							Nucleus 4	2500.56	497.429	218.081
					Nucleus 1	1055.02	1077.66	361.621		Nucleus 5	1452.49	246.606	177.399			Embryo 2 (16 cell)				Nucleus 5	2628.67	490.016	201.831
	Embryo 5				Nucleus 2	1008.7	1130.39	287.922		Nucleus 6	1666.07	173.824	196.695		Nucleus 1	3722.3	587.897	607.441		Nucleus 6	2459.85	466.786	384.802
Nucleus 1	988.81	841.483	571.634		Nucleus 3	1261.05	1105.74	376.148		Nucleus 7	1591.6	82.6354	84.2535		Nucleus 2	2917.94	326.494	223.691		Nucleus 7	2664.78	428.704	147.572
Nucleus 2	1099.71	946.195	504.188		Nucleus 4	1099.7	1327.91	310.092		Nucleus 8	1888.4	95.1836	65.2415		Nucleus 3	2668.52	546.935	567.838		Nucleus 8	2277.78	75.5593	24.596
										Nucleus 9	1203.22	43.053	2.18939		Nucleus 4	2461.61	409.967	457.442		Nucleus 9	3254.13	350.435	221.283
	Embryo 6					Embryo 4									Nucleus 5	2839.72	519.178	758.887		Nucleus 10	2785.6	462.136	120.346
Nucleus 1	1839.04	478.448	156.846		Nucleus 1	1116.75	765.219	698.268			Embryo 3 (8 cell)				Nucleus 6	3596.53	600.844	547.201		Nucleus 11	1798.77	44.9081	926.564
Nucleus 2	1161.7	1030.85	356.215		Nucleus 2	1020.43	740.403	605.702		Nucleus 1	2925.88	775.717	827.454		Nucleus 7	3356.08	682.111	708.129		Nucleus 12	3568	358.066	7.42726
					Nucleus 3	921.346	900.69	800.224		Nucleus 2	2663.88	548.299	428.883		Nucleus 8	3003.01	700.088	243.798		Nucleus 13	2681.44	337.74	2.88641
					Nucleus 4	850.914	715.335	829.931		Nucleus 3	2527.24	496.798	206.921		Nucleus 9	3601.42	612.344	370.733		Nucleus 14	2836.09	408.076	53.7629
										Nucleus 4	2567.25	348.729	273.579		Nucleus 10	3006.64	555.227	534.081		Nucleus 15	2807.52	344.347	28.9265
						Embryo 5
					Nucleus 1	1251.4	612.679	143.057			Embryo 4 (8 cell)					Embryo 3 (16 cell)					Embryo 3 (16 cell)
					Nucleus 2	1422.19	778.706	179.556		Nucleus 1	2117.68	712.085	139.903		Nucleus 1	3007.37	739.992	437.75		Nucleus 1	2620.89	324.945	13.8128
					Nucleus 3	1342.61	607.619	116.847		Nucleus 2	1925.63	506.917	214.451		Nucleus 2	3567.69	1013.61	850.362		Nucleus 2	3365.75	456.869	47.9744
					Nucleus 4	1409.96	726.553	162.51		Nucleus 3	2043.24	600.768	61.9483		Nucleus 3	2905.44	690.559	445.27		Nucleus 3	2482.44	399.387	463.79
										Nucleus 4	2555.92	538.64	23.4312		Nucleus 4	2643.14	365.52	177.461		Nucleus 4	2547.08	443	204.394
						Embryo 6				Nucleus 5	2653.6	525.631	433.434		Nucleus 5	2795.4	1013.07	879.991		Nucleus 5	2523.68	360.379	606.976
					Nucleus 1	1634.39	521.907	223.492		Nucleus 6	1886.39	434.381	133.457		Nucleus 6	2836.37	780.15	755.804		Nucleus 6	2329.02	526.487	753.658
					Nucleus 2	1346.51	575.368	296.138		Nucleus 7	2310.12	463.864	27.6551		Nucleus 7	3225.83	646.374	596.709		Nucleus 7	2577.18	440.809	494.405
					Nucleus 3	1752.76	587.706	331.559							Nucleus 8	3359.45	786.796	493.362		Nucleus 8	2521.31	297.04	324.178
					Nucleus 4	1652.23	478.624	213.958			Embryo 5				Nucleus 9	3080.65	562.831	557.956		Nucleus 9	2786.84	535.125	31.9489
										Nucleus 1	2276.84	559.472	211.056		Nucleus 10	3461.64	639.156	840.25		Nucleus 10	2876.76	426.629	76.4599
						Embryo 7				Nucleus 2	2467.6	483.414	214.353		Nucleus 11	3027.69	466.992	35.0843
					Nucleus 1	1763.49	679.652	187.285		Nucleus 3	2888.44	560.102	249.397		Nucleus 12	2559.76	310.458	175.19			Embryo 4 (15 cell)
					Nucleus 2	2083.17	525.41	167.258		Nucleus 4	1977.22	505.696	158.137		Nucleus 13	3116.77	976.258	755.768		Nucleus 1	2448.76	62.3659	2.19953
					Nucleus 3	1918.86	370.033	298.424		Nucleus 5	1832.59	702.703	213.012		Nucleus 14	3026.68	725.339	687.882		Nucleus 2	2785.98	51.8361	3.03666
					Nucleus 4	2179.67	214.53	197.202		Nucleus 6	2563.76	554.06	242.935		Nucleus 15	3093.76	762.654	526.784		Nucleus 3	2952.02	603.682	179.206
										Nucleus 7	1964.39	491.914	231.461							Nucleus 4	3009.87	305.684	111.908
						Embryo 8				Nucleus 8	2171.92	562.023	219.935			Embryo 4				Nucleus 5	3736.97	176.958	80.5769
					Nucleus 1	1915.07	258.024	336.988							Nucleus 1	3161.56	1008.35	677.658		Nucleus 6	2215.74	93.1207	33.1466
					Nucleus 2	2016.46	249.973	329.063			Embryo 6				Nucleus 2	3487.32	1224.4	763.91		Nucleus 7	1537.91	813.594	376.174
					Nucleus 3	1777.5	213.289	309.409		Nucleus 1	1641.16	832.764	115.631		Nucleus 3	3247.36	893.72	823.257		Nucleus 8	2644.48	343.195	69.5006
					Nucleus 4	2182.4	284.986	209.387		Nucleus 2	1444.4	720.139	324.395		Nucleus 4	3355.19	1071.19	862.262		Nucleus 9	4147.73	324.079	199.978
										Nucleus 3	1631.57	588.323	160.355		Nucleus 5	3280.94	748.336	780.746		Nucleus 10	2221.21	669.753	261.212
						Embryo 9				Nucleus 4	2085.15	565.816	257.969		Nucleus 6	3390.2	678.465	953.697		Nucleus 11	2423.85	624.71	234.872
					Nucleus 1	1681.16	337.398	81.3251		Nucleus 5	1579.7	738.969	142.174		Nucleus 7	3202.23	1406.58	562.735		Nucleus 12	2834.64	522.651	236.59
					Nucleus 2	1892.54	539.663	148.264		Nucleus 6	1782.41	505.371	116.425		Nucleus 8	2562.43	476.013	358.734		Nucleus 13	2235.78	726.32	252.12
					Nucleus 3	1861.52	233.816	71.0881							Nucleus 9	3445.06	958.332	896.189		Nucleus 14	3129.01	130.913	36.1808
					Nucleus 4	1787.9	14.0259	8.11178			Embryo 7				Nucleus 10	3057.76	1076.22	751.584		Nucleus 15	3481.7	358.06	145.586
										Nucleus 1	2193.14	498.625	13.8705		Nucleus 11	2753.29	1113.91	602.093		Nucleus 16	2507.48	91.4622	0
										Nucleus 2	1849.91	516.236	153.866		Nucleus 12	3579.25	956.239	625.676		Nucleus 17	3202.9	324.75	110.621
										Nucleus 3	2360.78	353.956	33.1115		Nucleus 13	3609.93	1000.61	540.38		Nucleus 18	3711.09	245.812	54.9994
										Nucleus 4	2080.06	489.684	93.5249		Nucleus 14	3035.09	1297.45	488.102
										Nucleus 5	2265.14	597.533	18.125		Nucleus 15	3492.99	1123.77	568.452			Embryo 5 (15 cell)
										Nucleus 6	2406.99	666.957	33.0263		Nucleus 16	5041.9	2099.13	415.303		Nucleus 1	2162.24	382.215	53.8259
																				Nucleus 2	2019.45	225.48	72.4399
											Embryo 8					Embryo 5 (16 cell)				Nucleus 3	2020.32	578.46	35.1043
										Nucleus 1	1877.96	1337.12	207.065		Nucleus 1	3217.87	1060.87	1010.2		Nucleus 4	2244.05	336.713	215.192
										Nucleus 2	1880.42	1214.62	156.317		Nucleus 2	3759.5	552.674	564.968		Nucleus 5	1898.72	260.132	27.2456
										Nucleus 3	2481.7	696.495	103.701		Nucleus 3	2810.32	301.749	379.783		Nucleus 6	2280.91	351.274	325.348
										Nucleus 4	2475.19	901.544	132.745		Nucleus 4	4123.74	404.516	465.932		Nucleus 7	1786.48	463.891	174.514
										Nucleus 5	2335.53	1039.19	82.9192		Nucleus 5	3417.59	953.123	839.311		Nucleus 8	1999.27	438.965	242.023
										Nucleus 6	2156.51	842.664	153.134		Nucleus 6	3730.55	301.595	586.758		Nucleus 9	2851.5	242.729	61.3395
										Nucleus 7	2220.82	1033.69	29.2323		Nucleus 7	2811.09	689.469	557.381		Nucleus 10	2036.55	210.558	123.519
															Nucleus 8	4753.76	878.146	644.31		Nucleus 11	2094.82	156.236	18.5246
											Embryo 9				Nucleus 9	2990.68	509.809	493.143		Nucleus 12	1935.1	388.983	8.32129
										Nucleus 1	2139.88	264.875	151.746		Nucleus 10	3826.44	274.911	540.89		Nucleus 13	2349.78	202.801	109.742
										Nucleus 2	1860.26	271.103	184.221		Nucleus 11	5020.6	220.713	485.211		Nucleus 14	1866.58	209.583	15.6791
										Nucleus 3	1821.43	233.428	125.386		Nucleus 12	2886.03	624.813	523.551
										Nucleus 4	1947.96	254.072	166.656		Nucleus 13	4493.85	248.889	182.724			Embryo 6 (14 cells)
										Nucleus 5	1964.11	283.077	172.932							Nucleus 1	2705.97	367.036	104.689
										Nucleus 6	1933.81	270.649	171.595			Embryo 6 (16 cell)				Nucleus 2	4696.04	112.217	22.0592
										Nucleus 7	1888.91	244.592	110.487		Nucleus 1	3194.25	594.847	652.387		Nucleus 3	1645.2	379.158	73.1492
															Nucleus 2	2898.85	569.551	703.12		Nucleus 4	2220.51	513.998	84.1551
											Embryo 10 (7 cell)				Nucleus 3	3024.03	642.529	1068.9		Nucleus 5	2819.09	344.65	192.965
										Nucleus 1	3533.91	240.312	124.164		Nucleus 4	3267.94	613.74	599.561		Nucleus 6	3140.57	375.525	33.4849
										Nucleus 2	1764.24	208.261	148.731		Nucleus 5	3346.09	603.959	1011.99		Nucleus 7	1829.52	485.32	17.432
										Nucleus 3	2047.96	253.17	138.92		Nucleus 6	3352.68	829.842	1148.16		Nucleus 8	2251.48	424.995	55.8539
										Nucleus 4	1680.78	51.7195	27.2556		Nucleus 7	3178.29	465.012	389.376		Nucleus 9	2006.35	540.961	103.342
										Nucleus 5	1485.08	34.8843	18.0463		Nucleus 8	3401.17	519.647	443.635		Nucleus 10	3822.44	2184.64	283.478
										Nucleus 6	1609.98	36.5036	33.6845		Nucleus 9	3406.41	609.804	408.438		Nucleus 11	1108.95	842.98	1213.18
										Nucleus 7	1382.73	70.2722	24.1899							Nucleus 12	2201.96	545.045	288.874
										Nucleus 8	1831.55	182.142	163.267							Nucleus 13	2032	701.922	918.604
										Nucleus 9	1543.54	75.9056	46.5741							Nucleus 14	3026.97	269.871	2.48995
										Nucleus 10	1261.99	419.828	174.408							Nucleus 15	1628.8	743.309	1101.25
										Nucleus 11	1445.18	294.176	120.401							Nucleus 16	1667.82	401.921	90.5402
										Nucleus 12	1351.67	155.076	60.6414
										Nucleus 13	2053.72	222.392	158.772
											Embryo 11
										Nucleus 1	2317.47	1005.78	285.786
										Nucleus 2	2639.52	1064.37	357.051
										Nucleus 3	2055.07	489.144	126.115
										Nucleus 4	2723.78	888.858	347.275
										Nucleus 5	2783.16	1238.65	170.705
										Nucleus 6	2686.1	754.354	116.469
										Nucleus 7	2337.54	791.266	313.273
										Nucleus 8	2399.49	669.947	131.425
										Nucleus 9	2693.57	1151.47	242.963
											Embryo 12 (9 cell)
										Nucleus 1	2971.58	1310.08	354.66
										Nucleus 2	2572.76	1357.91	491.029
										Nucleus 3	2917.96	969.27	451.123
										Nucleus 4	2943.76	916.097	360.393
										Nucleus 5	2487.55	1168.54	553.227
										Nucleus 6	2684.78	1192.67	459.798
										Nucleus 7	1789.46	818.857	478.268
										Nucleus 8	2507.92	687.013	351.036
										Nucleus 9	2800.03	1178.13	422.906
										Nucleus 10	2772.7	1523.81	390.463
											Embryo 13
										Nucleus 1	3784.5	1026.64	142.274
										Nucleus 2	2252.22	837.293	312.298
										Nucleus 3	3746.77	867.254	106.838
										Nucleus 4	1540.21	729.32	129.912
										Nucleus 5	2492.08	1066.62	167.84
										Nucleus 6	1756.78	837.882	228.002
										Nucleus 7	2145.62	664.844	361.453
										Nucleus 8	4084.76	687.335	103.88
										Nucleus 9	2012.22	1169.48	105.465

## Sheet: Eed mat null
Eedm-/- 2-cell (2-3 cells)					Eedm-/- ~4-cell (4-5 cells)					Eedm-/- ~8-cell (6-9 cells)					Eedm-/- ~16-cell (14-19 cells)
	DAPI	FITC	Cy3			DAPI	FITC	Cy3			DAPI	FITC	Cy3			DAPI	FITC	Cy3
	Embryo 1					Embryo 1					Embryo 1 (6 cell)					Embryo 1 (14 cell)
Nucleus 1	1092.44	141.622	20.4954		Nucleus 1	1099.95	210.876	43.2891		Nucleus 1	2001.96	765.588	500.211		Nucleus 1	3749.21	211.104	219.164
Nucleus 2	1097.46	112.204	140.646		Nucleus 2	1424.78	216.484	21.0123		Nucleus 2	1571.52	767.769	331.445		Nucleus 2	4537.22	252.949	157.107
					Nucleus 3	1318.73	214.677	81.4062		Nucleus 3	1555.48	689.778	282.372		Nucleus 3	6179.57	101.035	142.322
	Embryo 2				Nucleus 4	1186.12	172.662	54.7691		Nucleus 4	2569.57	744.645	647.411		Nucleus 4	9087.11	1.08367	0.282252
Nucleus 1	1289.04	203.976	130.782							Nucleus 5	1752.13	602.025	287.806		Nucleus 5	3240.07	80.9832	10.5166
Nucleus 2	1454.37	116.064	51.4583			Embryo 2				Nucleus 6	1386.97	659.433	316.749
					Nucleus 1	1455.7	194.04	68.8794		Nucleus 7	3359.41	189.507	214.724			Embryo 2 (19 cell)
	Embryo 3				Nucleus 2	1497.19	165.278	51.8852							Nucleus 1	4087.48	257.113	203.964
Nucleus 1	1785.94	133.86	33.7892		Nucleus 3	1763.15	165.616	47.4328			Embryo 2 (7 cell)				Nucleus 2	4487.64	119.679	329.931
Nucleus 2	2115.6	135.459	25.6925		Nucleus 4	1524.85	201.829	81.9367		Nucleus 1	1672.18	382.252	319.196		Nucleus 3	6417.17	127.024	488.045
Nucleus 3	3550.91	54.1607	43.3293							Nucleus 2	2171.91	304.347	173.194		Nucleus 4	3181.76	302.219	562.103
						Embryo 3				Nucleus 3	2344.82	492.402	394.718		Nucleus 5	3628.13	228.064	74.9193
	Embryo 4				Nucleus 1	1486.29	589.795	291.461		Nucleus 4	1940.98	260.504	138.643		Nucleus 6	4038.5	407.531	624.784
Nucleus 1	2315.83	88.056	22.1247		Nucleus 2	1464.14	463.997	76.553		Nucleus 5	2260.7	435.168	264.094		Nucleus 7	2694.06	223.393	436.892
Nucleus 2	2267.14	85.5057	15.4519		Nucleus 3	1780.26	632.3	315.665		Nucleus 6	1615.69	251.342	240.901		Nucleus 8	3353.95	218.77	450.771
Nucleus 3	1389.52	207.719	68.3243		Nucleus 4	1949.16	454.597	14.774		Nucleus 7	1977.98	220.906	165.992		Nucleus 9	4606.62	239.028	529.361
										Nucleus 8	2099.46	569.457	552.963		Nucleus 10	3631.31	337.938	515.344
	Embryo 5					Embryo 4				Nucleus 9	2007.88	509.011	457.826		Nucleus 11	3305.57	138.556	425.37
Nucleus 1	1640	164.195	161.436		Nucleus 1	1720.39	353.661	203.948							Nucleus 12	3281.61	222.849	456.647
Nucleus 2	1443.28	285.948	78.4183		Nucleus 2	1716.95	289.409	191.655			Embryo 3				Nucleus 13	3194.12	349.948	240.169
Nucleus 3	1613.6	226.333	21.6115		Nucleus 3	1554.45	432.184	208.832		Nucleus 1	1688.51	317.148	159.097		Nucleus 14	4406.14	12.3071	177.094
					Nucleus 4	1519.15	429.811	237.536		Nucleus 2	1802.6	266.462	185.959		Nucleus 15	3119.17	131.534	88.1236
	Embryo 6									Nucleus 3	1596.84	158.571	106.219		Nucleus 16	4495.06	29.9601	275.734
Nucleus 1	3434.28	47.4756	20.3462			Embryo 5				Nucleus 4	1465.17	167.948	60.8161		Nucleus 17	4901.31	116.448	10.3932
Nucleus 2	1236.12	400.281	184.412		Nucleus 1	2212.13	9.11912	2.0036		Nucleus 5	1522.26	243.025	160.891
Nucleus 3	1171.81	388.501	117.155		Nucleus 2	2348.13	219.91	106.251		Nucleus 6	1244.12	240.517	132.409			Embryo 3 (16 cell)
					Nucleus 3	2452.13	205.967	105.686		Nucleus 7	1316.05	305.984	159.912		Nucleus 1	3113.28	254.207	203.644
					Nucleus 4	2584.6	227.138	79.4374		Nucleus 8	1377.06	265.502	136.409		Nucleus 2	3365.24	230.647	51.6497
										Nucleus 9	1525.94	278.176	122.251		Nucleus 3	3000.62	229.287	185.315
															Nucleus 4	3151.55	101.503	467.18
											Embryo 4				Nucleus 5	3227.79	157.077	20.711
										Nucleus 1	2273.11	88.5052	104.177		Nucleus 6	3373.86	225.15	205.969
										Nucleus 2	2190.57	29.2896	47.3456		Nucleus 7	3181.33	124.278	244.22
										Nucleus 3	1607.12	203.84	111.816		Nucleus 8	2784.64	134.424	60.0026
										Nucleus 4	2043.21	145.041	88.7721		Nucleus 9	3417.22	103.02	232.884
										Nucleus 5	1930.15	76.483	113.42		Nucleus 10	3345.1	204.3	112.001
										Nucleus 6	1659.62	211.158	112.591		Nucleus 11	4127.01	102.8	222.899
										Nucleus 7	1407.82	148.749	90.8327		Nucleus 12	2719.54	215.625	9.74783
										Nucleus 8	1464.15	172.534	115.257
																Embryo 4
											Embryo 5				Nucleus 1	1641.43	212.908	138.695
										Nucleus 1	1959.97	91.5069	95.975		Nucleus 2	1920.14	217.893	121.15
										Nucleus 2	1637.75	211.376	119.734		Nucleus 3	1396.65	230.076	136.248
										Nucleus 3	1601.07	248.694	125.199		Nucleus 4	1871.68	250.61	126.379
										Nucleus 4	1355.23	157.841	91.5376		Nucleus 5	2196.61	179.183	95.2599
										Nucleus 5	1724.52	180.475	89.5031		Nucleus 6	1596.49	121.276	48.0996
										Nucleus 6	1525.66	226.738	114.159		Nucleus 7	1855.62	147.603	85.5879
										Nucleus 7	1447.69	237.606	121.519		Nucleus 8	1868.59	182.883	117.542
										Nucleus 8	1851.51	171.396	89.3705		Nucleus 9	1776.74	147.02	125.444
															Nucleus 10	1838.17	150.36	77.6904
															Nucleus 11	1961.21	140.98	55.6875
															Nucleus 12	1522.69	174.873	118.645
															Nucleus 13	1681.35	164.782	88.3392
															Nucleus 14	1406.48	24.5054	7.64714
																Embryo 5
															Nucleus 1	1385.26	202.375	116.34
															Nucleus 2	1531.2	254.38	183.355
															Nucleus 3	1698.24	297.317	155.471
															Nucleus 4	1670.01	230.625	124.691
															Nucleus 5	1746.7	215.223	110.792
															Nucleus 6	1652.35	290.683	190.677
															Nucleus 7	1468.66	247.741	140.18
															Nucleus 8	1248.9	256.32	158.193
															Nucleus 9	1591.01	250.281	150.691
															Nucleus 10	1516.76	278.107	175.513
															Nucleus 11	1548.51	259.538	132.283
															Nucleus 12	1581.21	250.273	157.838
															Nucleus 13	1708.57	95.8772	55.7705
															Nucleus 14	1529.79	250.67	142.953

## Sheet: Eed mz null
Eedmz-/- 2-cell					Eedmz-/- ~4-cell (4-5 cells)					Eedmz-/- ~8-cell (6-8 cells)					Eedmz-/- 16-cell
	DAPI	FITC	Cy3			DAPI	FITC	Cy3			DAPI	FITC	Cy3			DAPI	FITC	Cy3
	Embryo 1					Embryo 1					Embryo 1					Embryo 1 (16 cells)
Nucleus 1	1577.98	361.327	223.827		Nucleus 1	2813.44	9.25029	3.83632		Nucleus 1	3042.7	65.7387	0.798029		Nucleus 1	3411.44	30.1537	23.2161
Nucleus 2	2047.98	261.083	60.8535		Nucleus 2	3617.92	261.552	1.0285		Nucleus 2	3602.33	165.505	10.26		Nucleus 2	3694.16	19.076	11.8882
					Nucleus 3	2961.63	105.621	63.5133		Nucleus 3	3339.22	45.4793	15.5188		Nucleus 3	4363.77	50.9697	18.3329
	Embryo 2				Nucleus 4	4639.98	56.1731	26.4226		Nucleus 4	4076.35	73.0613	7.93983		Nucleus 4	3090	18.034	28.7095
Nucleus 1	1956.6	339.526	111.997							Nucleus 5	3961.2	61.8896	4.36803		Nucleus 5	3784.29	184.957	64.4304
Nucleus 2	1848.72	348.055	126.903			Embryo 2				Nucleus 6	3635.01	150.33	36.9717		Nucleus 6	2768.78	136.636	19.5077
					Nucleus 1	1379.59	112.055	2.46833							Nucleus 7	4447.09	183.075	52.0863
	Embryo 3				Nucleus 2	1413.24	289.475	44.0725			Embryo 2				Nucleus 8	3553.48	195.341	2.80664
Nucleus 1	1478.45	197.031	69.822		Nucleus 3	1337.07	108.35	3.65379		Nucleus 1	2370.73	86.5478	64.4829		Nucleus 9	3766.55	55.2041	6.47773
Nucleus 2	1369.92	162.926	66.0051		Nucleus 4	1773.73	53.488	0.001371		Nucleus 2	2147.73	53.7334	2.05344
										Nucleus 3	2352.88	129.144	102.1			Embryo 2 (16 cells)
	Embryo 4					Embryo 3				Nucleus 4	1923.1	131.027	15.9642		Nucleus 1	3846.81	1.29109	0.239143
Nucleus 1	2840.37	298.854	38.0764		Nucleus 1	2526.35	1.34034	1.0573		Nucleus 5	2719.67	244.663	125.568		Nucleus 2	6202.05	0	0.004461
Nucleus 2	1854.92	314.896	239.995		Nucleus 2	1582.4	44.7175	37.0542		Nucleus 6	1797.2	187.47	62.2615		Nucleus 3	4563.4	80.3534	204.01
					Nucleus 3	1347.24	149.289	25.1265							Nucleus 4	3759.22	42.0666	2.61488
	Embryo 5				Nucleus 4	1023.89	197.125	44.9633			Embryo 3				Nucleus 5	3981.45	34.3605	0.417367
Nucleus 1	2707.16	220.225	69.3476							Nucleus 1	6638.25	3.40451	1.61326		Nucleus 6	3551.68	18.486	1.07817
Nucleus 2	1846.87	257.696	70.3935			Embryo 4				Nucleus 2	4007.03	320.082	122.694		Nucleus 7	3635.48	126.397	2.58269
					Nucleus 1	1448.41	75.9627	12.4564		Nucleus 3	4826.77	300.69	308.089		Nucleus 8	4805.95	56.0759	0.100142
	Embryo 6				Nucleus 2	1105.41	175.061	74.409		Nucleus 4	3803.39	180.077	3.97145		Nucleus 9	4842.58	2.96582	0
Nucleus 1	1829.37	145.533	16.88		Nucleus 3	1427.74	136.242	48.4082		Nucleus 5	4114.49	175.412	36.2799
Nucleus 2	1663.91	139.24	18.7133		Nucleus 4	1252.72	152.914	62.5487		Nucleus 6	3608.65	239.382	30.721			Embryo 3 (16 cells)
															Nucleus 1	3363.69	150.592	113.587
	Embryo 7					Embryo 5					Embryo 4				Nucleus 2	3121.36	0.700573	3.36656
Nucleus 1	1298.88	129.734	53.8651		Nucleus 1	1577.72	192.665	58.876		Nucleus 1	4720.47	251.311	90.7297		Nucleus 3	3102.02	0.313039	0.080588
Nucleus 2	1175.4	95.1616	30.4651		Nucleus 2	1533.32	139.43	37.7435		Nucleus 2	3391.12	111.341	11.7266		Nucleus 4	2944.98	77.0692	47.225
					Nucleus 3	1511.88	154.179	34.2144		Nucleus 3	3932.19	173.415	13.3145		Nucleus 5	3100.44	3.70317	0.056907
	Embryo 8				Nucleus 4	1836.91	156.013	19.155		Nucleus 4	4436.08	134.811	23.6032		Nucleus 6	2929.73	54.47	23.6041
Nucleus 1	1404.99	181.866	34.1771							Nucleus 5	4168.56	98.0996	11.6454		Nucleus 7	3770.61	42.3754	38.7057
Nucleus 2	1312.84	74.9839	3.34169			Embryo 6				Nucleus 6	3430.79	113.803	28.8815		Nucleus 8	3504.41	4.99654	2.68835
					Nucleus 1	1401.69	169.161	28.4418		Nucleus 7	4013.7	216.81	110.92		Nucleus 9	2899.37	16.7401	26.2401
	Embryo 9				Nucleus 2	1329.54	272.053	74.3295							Nucleus 10	3189.03	150.407	753.029
Nucleus 1	2679.68	336.928	3.60415		Nucleus 3	1580.99	220.569	41.2925			Embryo 5				Nucleus 11	3261.87	14.331	40.8742
Nucleus 2	2953.86	384.507	0.83239		Nucleus 4	1378.76	201.538	26.8631		Nucleus 1	2139.12	211.641	69.0007		Nucleus 12	3169.47	10.1863	2.08609
										Nucleus 2	2740.34	52.2936	0.132896		Nucleus 13	2801.26	23.1163	4.7557
						Embryo 7				Nucleus 3	3931.56	95.8605	6.63687		Nucleus 14	4002.28	4.29723	16.2271
					Nucleus 1	1114.16	130.675	5.35898		Nucleus 4	2195.98	81.8067	322.858		Nucleus 15	3421.55	0.413646	0.773285
					Nucleus 2	1387.46	234.172	28.293		Nucleus 5	3193.93	82.1203	0.533937
					Nucleus 3	1157.22	267.851	46.05		Nucleus 6	2975.53	130.871	41.9529
					Nucleus 4	1444.83	161.107	0.630483		Nucleus 7	2774.6	9.18697	0.4013
										Nucleus 8	3173.71	0.127016	0.505613
						Embryo 8
					Nucleus 1	930.944	221.684	16.9622			Embryo 6 (8 cells)
					Nucleus 2	1302.89	155.593	43.4177		Nucleus 1	3312.66	6.78174	0.004243
					Nucleus 3	668.384	162.854	79.8056		Nucleus 2	4545.37	0.077702	0.007837
					Nucleus 4	658.409	243.243	70.7572		Nucleus 3	3804.45	215.641	127.882
										Nucleus 4	2987.34	228.652	146.859
						Embryo 9				Nucleus 5	2716.33	80.5585	40.755
					Nucleus 1	1265.54	220.087	65.1901		Nucleus 6	3144.88	262.987	108.368
					Nucleus 2	1255.06	153.268	15.477		Nucleus 7	3619.72	84.3243	45.2996
					Nucleus 3	966.515	116.144	27.1655
					Nucleus 4	1194.03	168.046	28.2708			Embryo 7
										Nucleus 1	2537.7	75.3208	0.171947
						Embryo 10				Nucleus 2	2159.88	124.076	114.063
					Nucleus 1	1018.06	231.261	6.64176		Nucleus 3	2938.93	18.7974	0.070752
					Nucleus 2	910.857	231.033	6.06524		Nucleus 4	2447.92	24.4009	0
					Nucleus 3	792.234	228.873	3.31801		Nucleus 5	2935.65	35.5438	0
					Nucleus 4	743.686	216.35	13.1869		Nucleus 6	1862.28	172.96	0.909265
										Nucleus 7	2221.03	18.2692	0.216786
						Embryo 11				Nucleus 8	3014.58	62.146	0.191728
					Nucleus 1	987.83	131.035	26.4236
					Nucleus 2	1116.08	179.62	44.5696
					Nucleus 3	994.53	136.835	33.3901
					Nucleus 4	1042.54	127.183	31.4143
						Embryo 12
					Nucleus 1	884.399	303.012	25.7405
					Nucleus 2	870.082	265.172	49.3348
					Nucleus 3	1005.02	253.139	25.5583
					Nucleus 4	923.914	255.606	23.9054
						Embryo 13
					Nucleus 1	713.176	170.99	20.4269
					Nucleus 2	771.236	160.126	6.71596
					Nucleus 3	871.044	231.994	40.0452
					Nucleus 4	852.474	87.9726	1.50207
						Embryo 14
					Nucleus 1	871.617	187.62	25.1837
					Nucleus 2	874.098	196.386	42.5314
					Nucleus 3	1044.73	185.041	5.55943
					Nucleus 4	964.875	149.775	9.1019
						Embryo 15
					Nucleus 1	785.278	219.533	53.5784
					Nucleus 2	787.717	232.547	55.0723
					Nucleus 3	680.027	311.829	58.7008
					Nucleus 4	861.571	251.538	8.46581
