# Supplementary material for: Conversion of random X-inactivation to imprinted X-inactivation by maternal PRC2
Source: eLife journal article supplement (doi:10.7554/elife.44258), 2019-04-02

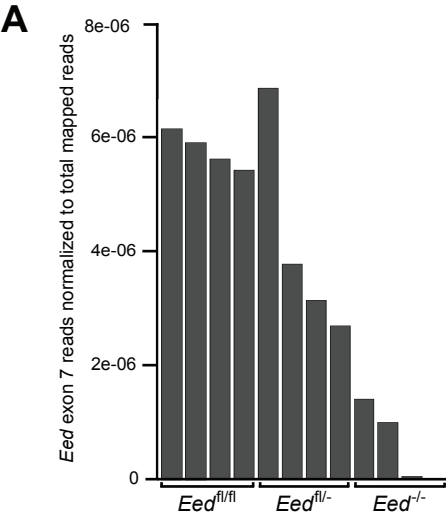

**B**

| Genotype                    | n | Avg. % Maternal X-linked Gene Expression | Avg. SNP-overlapping Reads per X-linked Gene | SNP Coverage Threshold |
|-----------------------------|---|------------------------------------------|----------------------------------------------|------------------------|
| <i>Eed</i> <sup>fl/fl</sup> | 4 | 85                                       | 4                                            | 10                     |
| <i>Eed</i> <sup>fl/+</sup>  | 4 | 90                                       | 4                                            | 10                     |
| <i>Eed</i> <sup>-/-</sup>   | 4 | 88                                       | 4                                            | 10                     |

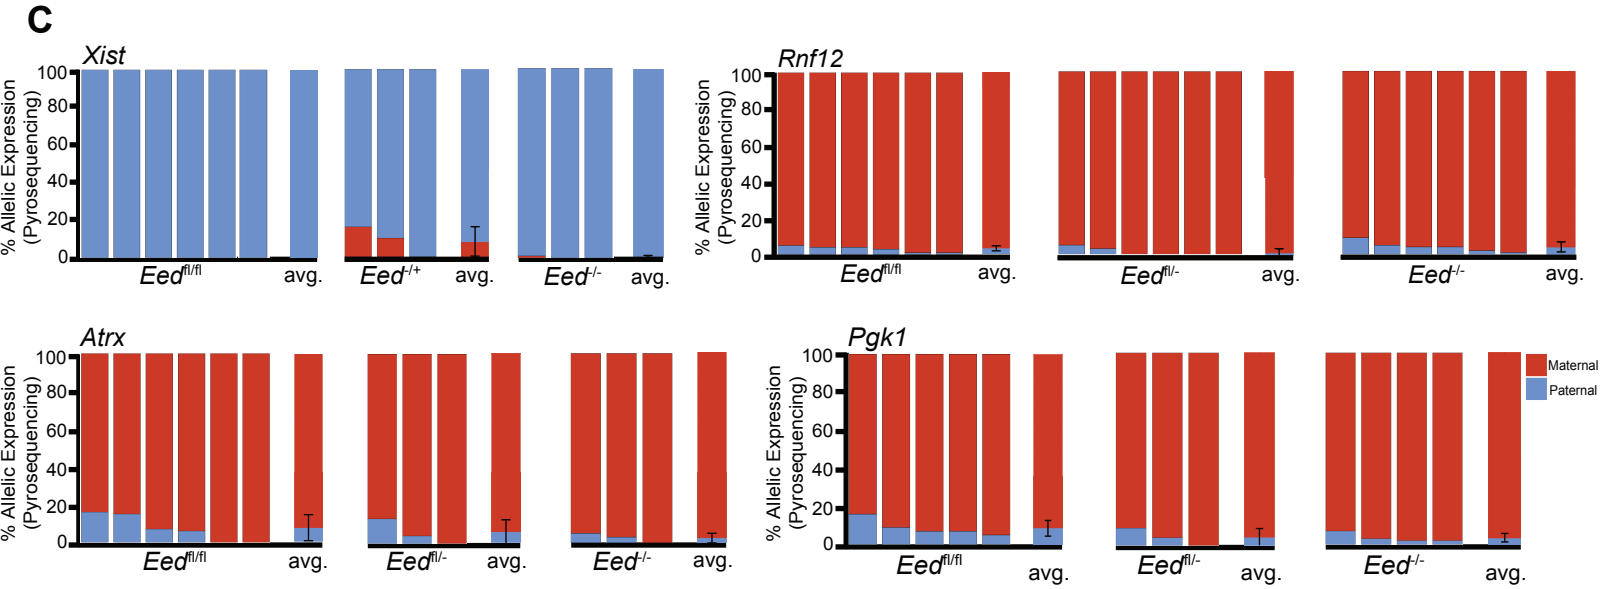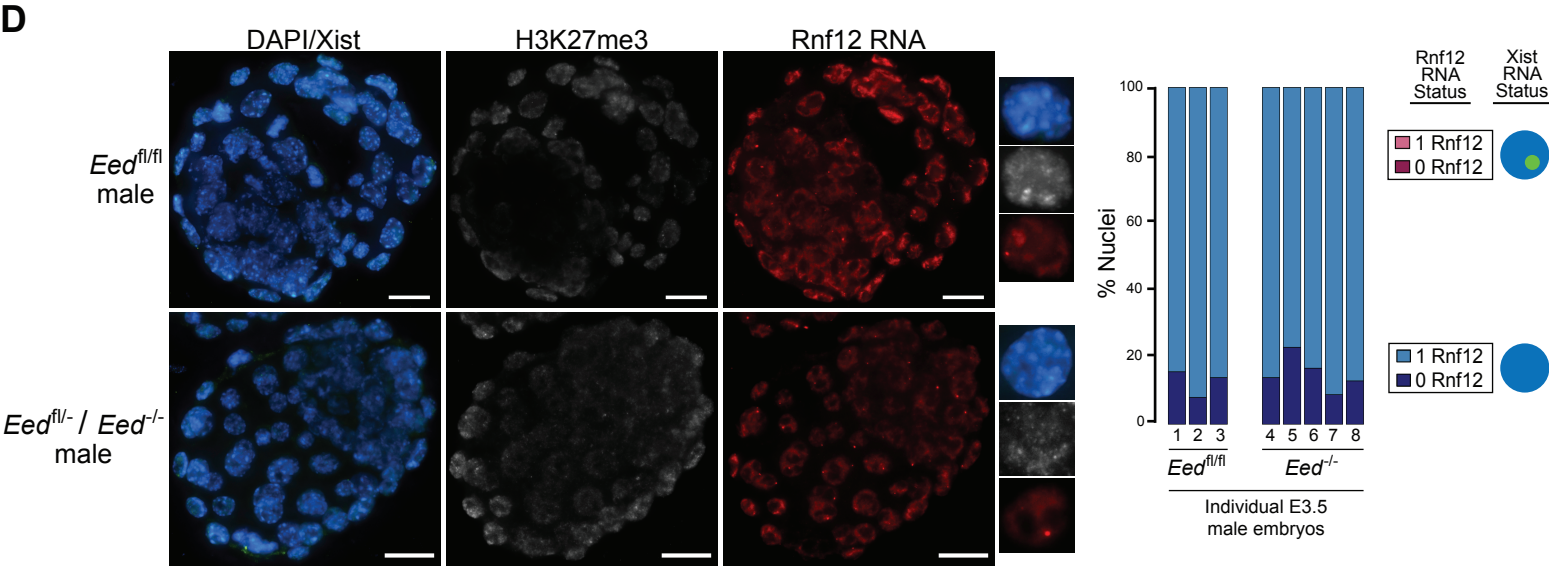

Supplement: supp [file elife-44258-supp-v1.zip]
