# Supplementary material for: Conversion of random X-inactivation to imprinted X-inactivation by maternal PRC2
Source: eLife journal article supplement (doi:10.7554/elife.44258), 2019-04-02
Supplement: supp [file elife-44258-supp-v1.zip]

A

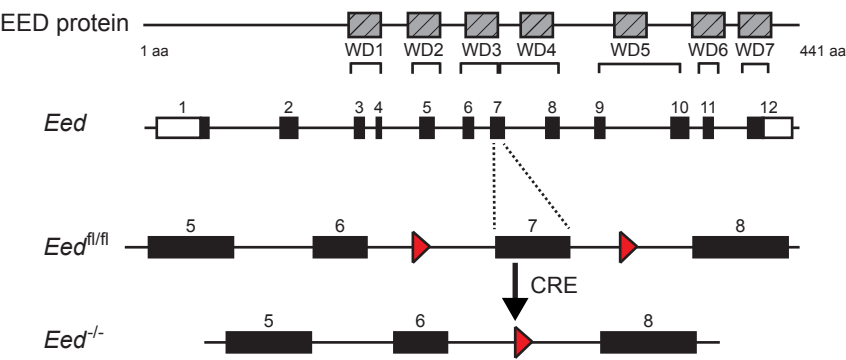

B

*Eed<sup>fl</sup>* deletion efficiency by *Prm-Cre*

| Dam                              | Sire                               | Number of litters | Number of pups | <i>Eed<sup>fl/fl</sup></i> pups | <i>Eed<sup>fl/-</sup></i> or <i>Eed<sup>+/-</sup></i> pups |
|----------------------------------|------------------------------------|-------------------|----------------|---------------------------------|------------------------------------------------------------|
| <i>Eed<sup>fl/fl</sup></i>       | <i>Eed<sup>fl/fl</sup>;Prm-Cre</i> | 6                 | 36             | 4 (11%)                         | 32 (89%)                                                   |
| <i>Eed<sup>fl/fl</sup></i> or WT | <i>Eed<sup>fl/-</sup>;Prm-Cre</i>  | 17                | 88             | 8 (9%)                          | 80 (91%)                                                   |
