# Supplementary material for: Conversion of random X-inactivation to imprinted X-inactivation by maternal PRC2
Source: eLife. 2019 Apr 2;8:e44258. doi: 10.7554/eLife.44258 (PMC6541438; doi:10.7554/eLife.44258)
Supplement: Supplementary file 1. — Statistical comparisons of EED and H3K27me3 IF intensities between all genotypes at each embryonic stage analyzed in Figure 2 (Two-tailed Student’s T-test). [file elife-44258-supp1.docx]

**Pairwise Analysis of IF Intensity Data in Figure 2**

**(Student’s Two-tailed T-test)**

| **~2-cell embryos - EED** | | | | | |
| --- | --- | --- | --- | --- | --- |
|  | *Eed*fl/fl | *Eed*fl/-/ *Eed*-/- | *Eed*m-/- | *Eed*mz-/- |
| *Eed*fl/fl |  |  |  |  |
| *Eed*fl/- / *Eed*-/- | 0.58 |  |  |  |
| *Eed*m-/- | 5 x 10-5 | .02 |  |  |
| *Eed*mz-/- | 2 x 10-6 | 3 x 10-3 | .88 |  |

**~2-cell embryos - H3K27me3**

|  | *Eed*fl/fl | *Eed*fl/-/ *Eed*-/- | *Eed*m-/- | *Eed*mz-/- |
| --- | --- | --- | --- | --- |
| *Eed*fl/fl |  |  |  |  |
| *Eed*fl/- / *Eed*-/- | .28 |  |  |  |
| *Eed*m-/- | 4 x 10-4 | 1 x 10-4 |  |  |
| *Eed*mz-/- | 8 x 10-6 | 1 x 10-5 | .18 |  |

**~4-cell embryos - EED**

|  | *Eed*fl/fl | *Eed*fl/-/ *Eed*-/- | *Eed*m-/- | *Eed*mz-/- |
| --- | --- | --- | --- | --- |
| *Eed*fl/fl |  |  |  |  |
| *Eed*fl/- / *Eed*-/- | 3 x 10-3 |  |  |  |
| *Eed*m-/- | 3 x 10-3 | .04 |  |  |
| *Eed*mz-/- | 2 x 10-8 | 2 x 10-6 | 2 x 10-4 |  |

**~4-cell embryos - H3K27me3**

|  | *Eed*fl/fl | *Eed*fl/-/ *Eed*-/- | *Eed*m-/- | *Eed*mz-/- |
| --- | --- | --- | --- | --- |
| *Eed*fl/fl |  |  |  |  |
| *Eed*fl/- / *Eed*-/- | .08 |  |  |  |
| *Eed*m-/- | 4 x 10-3 | .06 |  |  |
| *Eed*mz-/- | 2 x 10-6 | 3 x 10-5 | .01 |  |

**~8-cell embryos - EED**

|  | *Eed*fl/fl | *Eed*fl/-/ *Eed*-/- | *Eed*m-/- | *Eed*mz-/- |
| --- | --- | --- | --- | --- |
| *Eed*fl/fl |  |  |  |  |
| *Eed*fl/- / *Eed*-/- | 2 x 10-4 |  |  |  |
| *Eed*m-/- | 5 x 10-4 | .67 |  |  |
| *Eed*mz-/- | 8 x 10-8 | .02 | .01 |  |

**~8-cell embryos - H3K27me3**

|  | *Eed*fl/fl | *Eed*fl/-/ *Eed*-/- | *Eed*m-/- | *Eed*mz-/- |
| --- | --- | --- | --- | --- |
| *Eed*fl/fl |  |  |  |  |
| *Eed*fl/- / *Eed*-/- | .48 |  |  |  |
| *Eed*m-/- | .01 | .076 |  |  |
| *Eed*mz-/- | 5 x 10-7 | 1 x 10-3 | .03 |  |

**~16-cell embryos - EED**

|  | *Eed*fl/fl | *Eed*fl/- | *Eed*-/- | *Eed*m-/- | *Eed*mz-/- |
| --- | --- | --- | --- | --- | --- |
| *Eed*fl/fl |  |  |  |  |  |
| *Eed*fl/- | .29 |  |  |  |  |
| *Eed*-/- | 6 x 10-4 | 3 x 10-5 |  |  |  |
| *Eed*m-/- | 7 x 10-4 | 5 x 10-5 | .44 |  |  |
| *Eed*mz-/- | 5 x 10-4 | 4 x 10-5 | .01 | .08 |  |

**~16-cell embryos - H3K27me3**

|  | *Eed*fl/fl | *Eed*fl/- | *Eed*-/- | *Eed*m-/- | *Eed*mz-/- |
| --- | --- | --- | --- | --- | --- |
| *Eed*fl/fl |  |  |  |  |  |
| *Eed*fl/- | .14 |  |  |  |  |
| *Eed*-/- | .30 | 9 x 10-3 |  |  |  |
| *Eed*m-/- | 5 x 10-3 | 2 x 10-4 | 6 x 10-4 |  |  |
| *Eed*mz-/- | 6 x 10-3 | 9 x 10-4 | 5 x 10-4 | 5 x 10-3 |  |
