# Supplementary material for: Conversion of random X-inactivation to imprinted X-inactivation by maternal PRC2
Source: eLife. 2019 Apr 2;8:e44258. doi: 10.7554/eLife.44258 (PMC6541438; doi:10.7554/eLife.44258)
Supplement: Supplementary file 2. — Analysis of each informative X-linked gene (>10 reads/SNP). [file elife-44258-supp2.xlsx]

## Sheet: Data
Gene Name	Location	Proportion Paternal-X Expression					Proportion Paternal-X Expression					Proportion Paternal-X Expression					Proportion Paternal-X Expression						Proportion Paternal-X Expression				>10% change from Eedfl/fl to Eedfl/-	>10% change from Eedfl/fl to Eed-/-	>10% change from Eedfl/fl to Eedm-/-	>10% change from Eedfl/fl to Eedmz-/-	>10% change from Eedfl/- to Eed-/-	>10% change from Eedfl/- to Eedm-/-	>10% change from Eedfl/- to Eedmz-/-	>10% change from Eed-/- to Eedm-/-	>10% change from Eed-/- to Eedmz-/-	>10% change from Eedm-/- to Eedmz-/-
		Eedfl/fl Rep 1	Eedfl/fl Rep 2	Eedfl/fl Rep 3	Eedfl/fl Rep 4	Average Eedfl/fl	Eedfl/- Rep 1	Eedfl/- Rep 2	Eedfl/- Rep 3	Eedfl/- Rep 4	Average Eedfl/-	Eed-/- Rep 1	Eed-/- Rep 2	Eed-/- Rep 3	Eed-/- Rep 4	Average Eed-/-	Eedm-/- Rep 1	Eedm-/- Rep 2	Eedm-/- Rep 3	Eedm-/- Rep 4	Eedm-/- Rep 5	Average Eedm-/-	Eedmz-/- Rep 1	Eedmz-/- Rep 2	Eedmz-/- Rep 3	Average Eedmz-/-
1110012L19Rik	chrX:67639088-67642591	0.106094	0.001221	0	0.0255811	0.0332239	0	0.0198462	0	0	0.0066154	0.0624322	0	0	0.00980742	0.00326914	0.214277	0.224273	0.0830935	0.113454	0.162407	0.159501	0.46693	0.0827561	0.329427	0.293038	No	No	Yes	Yes	No	Yes	Yes	Yes	Yes	No
1600014K23Rik	chrX:82495016-82515630	0	0	0	0.00437643	0.00109411	NA	0.0037037	0	0	0.00123457	0.0191251	0	0	0	0	0.776876	0	0.431373	NA	0	0.302062	0.709542	0.60414	0.589898	0.634526	No	No	Yes	Yes	No	Yes	Yes	Yes	Yes	No
1700003E24Rik	chrX:90428633-90429283	NA	0	NA	NA	0	NA	NA	NA	NA	NA	NA	NA	NA	NA	NA	NA	NA	NA	NA	NA	NA	NA	NA	NA	NA	NA	NA	NA	NA	NA	NA	NA	NA	NA	NA
1700013H16Rik	chrX:51046078-51061008	NA	NA	NA	NA	NA	NA	NA	NA	0.0104167	0.0104167	0.284701	0	NA	NA	0	NA	NA	NA	NA	0.391332	0.391332	0.491755	NA	0.55369	0.522722	NA	NA	NA	NA	No	Yes	Yes	Yes	Yes	No
1810030O07Rik	chrX:141880967-141921589	0.344528	0	0.460609	0.456817	0.315489	0	0.6267	0	0.771835	0.466178	0.461106	0	0.332069	0.481874	0.271315	0.567488	0.758081	0.787406	0.493135	0.855787	0.69238	0.508046	0.493724	0.525938	0.509236	Yes	No	Yes	Yes	No	Yes	No	Yes	Yes	No
2210013O21Rik	chrX:70163860-70203867	0	0	0	0	0	0	0	0	0	0	0	0	0	0.0909091	0.030303	0	0.167494	0.0526316	NA	0.0416667	0.065448	0.133333	0.0588235	0.225806	0.139321	No	No	No	Yes	No	No	Yes	No	Yes	No
2610018G03Rik	chrX:48194613-48245027	0	0	NA	NA	0	0	NA	NA	0	0	NA	NA	0	NA	0	NA	NA	NA	0	NA	0	NA	NA	NA	NA	No	No	No	NA	No	No	Yes	No	Yes	NA
2610029G23Rik	chrX:102275114-102280525	NA	NA	0	0.227273	0.113636	NA	0.333333	NA	1	0.666667	0	NA	0.239225	0.1	0.169612	0.459278	0.0588235	0.270779	0.989583	0.664737	0.48864	0.435145	0.578846	0.692308	0.568766	Yes	No	Yes	Yes	No	No	No	Yes	Yes	No
2610030H06Rik	chrX:69062118-69070045	0	0	0	0	0	0	0.0951271	0	0	0.031709	0.0515567	0	0.0283897	0	0.00946324	0.7	0	0.412587	0.271943	0.156437	0.308193	0.683391	0.23965	0.409508	0.444183	No	No	Yes	Yes	No	Yes	Yes	Yes	Yes	No
2810403D21Rik	chrX:106029996-106082235	NA	NA	0.966667	NA	0.966667	0	NA	NA	NA	NA	0	NA	NA	0	0	NA	NA	1	1	0.7	0.9	NA	NA	NA	NA	NA	Yes	No	NA	NA	NA	NA	Yes	NA	NA
2900002K06Rik	chrX:7722553-7725089	NA	0	0.454545	0.692308	0.382284	NA	0.538462	NA	0.527778	0.53312	0.307692	NA	0.230769	0.3	0.265385	NA	0	0.3125	NA	0.25	0.1875	0.573529	0.5	0.678571	0.584034	Yes	No	No	Yes	No	No	No	No	Yes	No
2900056M20Rik	chrX:148749855-148762013	NA	NA	NA	NA	NA	NA	NA	NA	0.166667	0.166667	0.5	NA	NA	NA	NA	NA	NA	NA	NA	NA	NA	NA	NA	NA	NA	NA	NA	NA	NA	NA	NA	NA	NA	NA	NA
2900062L11Rik	chrX:132528359-132529898	0.316842	NA	NA	NA	0.316842	NA	NA	0	NA	0	0	NA	0	0	0	0	NA	NA	NA	0	0	0.341241	0.140909	0.551298	0.344483	No	No	No	No	No	No	Yes	No	Yes	No
3110007F17Rik	chrX:120217168-120256902	NA	NA	NA	NA	NA	NA	NA	NA	NA	NA	0	NA	NA	NA	NA	NA	NA	NA	NA	NA	NA	NA	NA	NA	NA	NA	NA	NA	NA	NA	NA	NA	NA	NA	NA
3830403N18Rik	chrX:53389749-53406673	NA	NA	NA	0	0	NA	NA	NA	0	0	0	0	NA	NA	0	NA	NA	NA	NA	NA	NA	0.478063	0.411765	0.535688	0.475172	No	NA	NA	Yes	No	NA	NA	NA	NA	No
3830417A13Rik	chrX:61426723-61431953	NA	0	NA	NA	0	NA	NA	NA	NA	NA	0	NA	NA	NA	NA	NA	0.170588	NA	NA	0	0.0852942	0.27155	NA	0.367698	0.319624	NA	NA	No	Yes	NA	NA	NA	NA	NA	No
4930519F16Rik	chrX:100427620-100451945	1	NA	NA	NA	1	NA	NA	NA	NA	NA	NA	NA	NA	NA	NA	NA	NA	NA	NA	NA	NA	0.5	NA	NA	0.5	NA	NA	NA	No	NA	NA	NA	NA	NA	No
4930524E20Rik	chrX:112021191-112022119	NA	NA	NA	NA	NA	NA	NA	NA	NA	NA	NA	NA	NA	NA	NA	NA	NA	NA	NA	NA	NA	NA	0.9	NA	0.9	NA	NA	NA	NA	NA	NA	NA	NA	NA	No
4930550L24Rik	chrX:56164638-56173481	NA	NA	NA	0	0	NA	NA	0.000494315	0	0.000247158	NA	NA	NA	0	0	NA	0.472629	NA	1	0	0.490876	0.719529	0.463563	0.155227	0.446106	No	No	Yes	Yes	No	Yes	Yes	Yes	Yes	No
4933402E13Rik	chrX:97818245-97821246	NA	NA	NA	0	0	NA	NA	0	NA	0	0	0	0	0	0	0	NA	NA	NA	NA	0	NA	NA	NA	NA	No	No	No	NA	No	No	Yes	No	Yes	NA
4933407K13Rik	chrX:72970797-73010038	0	NA	NA	NA	0	NA	NA	NA	NA	NA	0.5	NA	NA	NA	NA	NA	NA	NA	NA	NA	NA	NA	NA	NA	NA	NA	NA	NA	NA	NA	NA	NA	NA	NA	NA
5430427O19Rik	chrX:83115612-83136838	NA	NA	0	0.5	0.25	NA	NA	NA	NA	NA	NA	NA	0	NA	0	0	NA	0	0	0	0	NA	NA	NA	NA	NA	NA	No	NA	NA	NA	NA	NA	NA	NA
5530601H04Rik	chrX:102236193-102265463	0.0238095	0	0.0680865	0.08009	0.0429965	0.00357143	0.302572	0	0	0.100857	0.240783	0	0.271368	0.17287	0.148079	0.300609	0.466038	0.234186	0.676289	0.377641	0.410953	0.412395	0.211889	0.484604	0.369629	No	Yes	Yes	Yes	No	Yes	Yes	Yes	Yes	No
6530401D17Rik	chrX:132,567,906-132,569,485	NA	0	NA	NA	0	NA	NA	NA	NA	NA	NA	NA	NA	NA	NA	NA	NA	NA	NA	NA	NA	0.243258	NA	0.556255	0.399756	NA	NA	NA	Yes	NA	NA	NA	NA	NA	No
6720401G13Rik	chrX:47908921-47988435	0	NA	0	NA	0	NA	NA	0.2	1	0.6	0	NA	0	NA	0	0	NA	NA	0	NA	0	NA	NA	0.409091	0.409091	Yes	No	No	Yes	No	No	No	No	Yes	No
8030474K03Rik	chrX:12232010-12250672	NA	0	0	NA	0	NA	NA	0	0	0	0.149782	0	0.0277778	NA	0.0138889	0.658832	0.145453	0.757703	0.936684	0.331267	0.565988	0.529574	0.613932	0.330384	0.491297	No	No	Yes	Yes	No	Yes	Yes	Yes	Yes	No
A230072C01Rik	chrX:20538802-20564475	NA	NA	NA	NA	NA	NA	0	NA	NA	0	0.00666667	NA	0.00769231	0	0.00384615	NA	0.316667	0	NA	NA	0.158333	NA	0.8	NA	0.8	NA	NA	NA	NA	No	Yes	Yes	Yes	Yes	No
A630033H20Rik	chrX:104344793-104369000	NA	NA	NA	NA	NA	NA	NA	NA	NA	NA	NA	NA	NA	NA	NA	NA	NA	NA	0	NA	0	NA	NA	NA	NA	NA	NA	NA	NA	NA	NA	NA	NA	NA	NA
A730046J19Rik	chrX:140588238-140600817	NA	0	NA	NA	0	NA	NA	NA	NA	NA	NA	NA	NA	NA	NA	NA	NA	NA	NA	NA	NA	NA	NA	NA	NA	NA	NA	NA	NA	NA	NA	NA	NA	NA	NA
A830080D01Rik	chrX:7471649-7476354	0.2	0	0.113636	0.332057	0.161423	0	0.341364	0	0.174208	0.171857	0.150281	0	0.229718	0.365865	0.198527	0.709052	0.117479	0.424951	0.764706	0.117491	0.426736	0.395491	0.457061	0.433217	0.42859	No	No	Yes	Yes	No	Yes	Yes	Yes	Yes	No
Abcb7	chrX:101475904-101609185	NA	0	0	0.030303	0.010101	NA	NA	0.030303	NA	0.030303	0	0	0.11803	0.161702	0.0932441	NA	0	NA	NA	0.0504202	0.0252101	0.541958	0.127147	0.348485	0.339197	No	No	No	Yes	No	No	Yes	No	Yes	No
Abcd1	chrX:6949717-6952956	NA	0	0	0.0354839	0.011828	0	0.531994	0	NA	0.265997	0.250496	0.0214286	0.053163	0.128094	0.0675618	0.508964	0.352382	0.494788	0.568702	0.306815	0.44633	0.277778	0.308058	NA	0.292918	Yes	No	Yes	Yes	No	Yes	No	Yes	Yes	No
Acot9	chrX:151697043-151732050	0.330692	0	0.0552555	0.210902	0.149212	0	0.0478295	0	0	0.0159432	0.0349394	0.00350877	0.00473973	0.0671276	0.0251254	0.244643	0.332826	0.444145	0.152937	0.0921738	0.253345	0.586575	0.222011	0.524506	0.444364	No	No	Yes	Yes	No	Yes	Yes	Yes	Yes	Yes
Acsl4	chrX:138752536-138825078	0.141462	NA	0	0	0.0471541	0	NA	NA	0	0	0.107143	NA	0	NA	0	NA	NA	0.454545	NA	0.958333	0.706439	0.58114	0.698333	NA	0.639737	No	No	Yes	Yes	No	Yes	Yes	Yes	Yes	No
Aifm1	chrX:45828121-45866603	0	0	0	0.0770789	0.0192697	0	0.205453	0.00505051	0.170616	0.12704	0.105332	0.00574713	0.0527491	0.166457	0.0749843	0	0.161886	0.286341	0.460205	0.276018	0.23689	0.476371	0.374888	0.473403	0.441554	Yes	No	Yes	Yes	No	Yes	Yes	Yes	Yes	Yes
Akap17b	chrX:12252497-12339099	0	0	0	0.125	0.03125	0	0	0	0	0	0.345614	0	0	NA	0	1	0	NA	NA	NA	0.5	0.545166	0.307692	0.438462	0.43044	No	No	Yes	Yes	No	Yes	Yes	Yes	Yes	No
Alas2	chrX:146981960-147005165	0.000701754	0	0.00210614	0.000930233	0.000934531	0.000338476	0.000651466	0.000332779	0	0.000328082	0	0	0	0	0	0.000440214	0	0.000852972	0.000763169	0	0.000411271	0.00949395	0.000653595	0	0.00338252	No	No	No	No	No	No	No	No	No	No
Alg13	chrX:140752509-140759740	NA	NA	0.659574	0.584906	0.62224	NA	0.122449	0	0	0.0408163	0.144444	0	0.0188679	0.0625	0.0271226	NA	0.0454545	0.388889	0.333333	0.142857	0.227633	0.142857	0.448653	0.375	0.32217	No	No	No	No	No	Yes	Yes	Yes	Yes	No
Ammecr1	chrX:139288017-139401271	NA	NA	NA	NA	NA	NA	NA	NA	NA	NA	0	NA	NA	NA	NA	NA	NA	NA	NA	NA	NA	NA	NA	NA	NA	NA	NA	NA	NA	NA	NA	NA	NA	NA	NA
Amot	chrX:141880967-141922182	0	NA	0.255028	0.191571	0.148866	NA	NA	NA	NA	NA	0.460317	NA	NA	NA	NA	NA	0	NA	NA	0.1	0.05	0.416633	0.422619	NA	0.419626	NA	NA	No	Yes	NA	NA	NA	NA	NA	No
Ankrd58	chrX:34588840-34590413	NA	0	NA	NA	0	NA	NA	NA	NA	NA	NA	NA	NA	NA	NA	NA	NA	NA	NA	NA	NA	NA	NA	NA	NA	NA	NA	NA	Yes	NA	NA	NA	NA	NA	NA
Ap1s2	chrX:160347092-160367478	NA	NA	0.21978	0	0.10989	0	NA	NA	NA	NA	NA	NA	NA	NA	NA	0	NA	NA	NA	NA	0	NA	NA	0.7298	0.7298	NA	NA	No	Yes	NA	NA	NA	NA	NA	No
Apex2	chrX:147006050-147022692	0	0	0	0	0	0	0.255948	0	0.580707	0.278885	0	0	0	0	0	NA	0.237745	0	NA	0.358116	0.19862	0.462759	0.400794	0.407719	0.423757	Yes	No	Yes	Yes	No	No	Yes	Yes	Yes	No
Apln	chrX:45378323-45388030	NA	NA	NA	NA	NA	NA	NA	NA	0	0	NA	NA	NA	NA	NA	NA	NA	NA	NA	NA	NA	NA	NA	NA	NA	NA	NA	NA	NA	NA	NA	NA	NA	NA	NA
Apoo	chrX:161376141-161418267	0.526195	0	0.403181	0.313503	0.31072	0	0.34231	0	0.319555	0.220622	0.35488	0	0.237153	0.312725	0.183293	0.592781	0.427326	0.665022	0.538858	0.282396	0.501276	0.490086	0.422742	0.51843	0.477086	No	No	Yes	Yes	No	Yes	Yes	Yes	Yes	No
Apool	chrX:147481776-147523642	NA	0	0.117647	0.205128	0.107592	0	0.182796	0	0.260504	0.147767	0.147541	0	0.0535714	0.207547	0.0870395	0.391892	0.150685	0.508197	0.508197	0.171875	0.346169	0.412698	0.326087	0.456522	0.398436	No	No	Yes	Yes	No	Yes	Yes	Yes	Yes	No
Arhgap4	chrX:71139691-71156637	0	NA	0	0	0	0	NA	NA	0	0	NA	0	0	0	0	NA	0	0	0	0	0	NA	0	NA	0	No	No	No	No	No	No	No	No	No	No
Arhgap6	chrX:165233031-165742372	0	NA	NA	NA	0	0.5	NA	NA	NA	NA	NA	NA	NA	NA	NA	NA	0	NA	NA	NA	0	NA	NA	NA	NA	NA	NA	No	NA	NA	NA	NA	NA	NA	NA
Arhgef6	chrX:68673245-68745820	NA	NA	NA	0	0	0	NA	NA	NA	NA	NA	NA	0	0	0	NA	NA	NA	0	0	0	NA	NA	NA	NA	NA	NA	No	NA	NA	NA	NA	NA	NA	NA
Armcx1	chrX:131252477-131256451	0	NA	0.125	0	0.0416667	NA	NA	0.5	NA	0.5	0.107565	0.5	NA	0.5	0.5	NA	NA	NA	NA	NA	NA	0.435897	0.25	0.520712	0.402203	Yes	NA	NA	Yes	No	Yes	No	NA	No	No
Armcx2	chrX:104115964-104129238	NA	NA	NA	NA	NA	NA	NA	NA	NA	NA	NA	NA	0	0.461538	0.230769	NA	NA	NA	NA	NA	NA	NA	NA	NA	NA	NA	NA	NA	NA	NA	NA	NA	NA	NA	NA
Armcx3	chrX:131291107-131295995	NA	NA	NA	NA	NA	0	NA	NA	NA	NA	NA	NA	NA	NA	NA	0	NA	NA	NA	NA	0	NA	NA	NA	NA	NA	NA	NA	NA	NA	NA	NA	NA	NA	NA
Armcx5	chrX:132277231-132281867	NA	0	0	0.411993	0.137331	0	0.187041	0	0.0651779	0.0840728	0.354622	0	0.313638	0.310225	0.207954	NA	0.726984	0.587253	0.809524	0.268652	0.598103	0.589601	0.421188	0.8125	0.607763	No	No	Yes	Yes	Yes	Yes	Yes	Yes	Yes	No
Atg4a	chrX:103382463-103399038	0	0	0	0.122378	0.0305944	NA	0	0	NA	0	0	0	0	0	0	0.217647	0.251124	0	NA	0	0.117193	0.393939	0.240909	0.656818	0.430556	No	No	No	Yes	No	Yes	Yes	Yes	Yes	No
Atg4a-2	chrX:137593241-137598813	NA	0	0	0	0	NA	0	0	NA	0	0	0	0	0	0	0.181818	0.0520833	NA	NA	0	0.0779672	0.133333	0.301316	0.228084	0.220911	No	No	No	Yes	No	No	Yes	No	Yes	No
Atp11c	chrX:57476467-57657156	NA	0	0	0.025	0.00833333	0	0.077342	0	NA	0.038671	0	0	0.1	0.335897	0.145299	0.25	NA	0	0	NA	0.0833333	0.636364	0.362023	0.408333	0.468907	No	Yes	No	Yes	Yes	No	Yes	No	Yes	No
Atp6ap1	chrX:71542436-71550060	0.700278	0.0048023	0.29629	0.277314	0.319671	0.00129543	0.280959	0.00766741	0.390036	0.226221	0.323458	0.00877086	0.257075	0.135726	0.133857	0.321751	0.345447	0.353713	0.429822	0.468927	0.383932	0.383413	0.388381	0.588607	0.453467	No	No	No	Yes	No	Yes	Yes	Yes	Yes	No
Atp6ap2	chrX:12164885-12194177	0.34257	0	0.216238	0.244354	0.200791	0	0.321475	0.00230415	0.222079	0.181953	0.381211	0.00155223	0.239338	0.266731	0.169207	0.336879	0.371056	0.326081	0.447531	0.329315	0.362172	0.484833	0.359397	0.552849	0.465693	No	No	Yes	Yes	No	Yes	Yes	Yes	Yes	No
Atp7a	chrX:103222615-103323499	NA	NA	NA	0.5	0.5	NA	NA	0.333333	NA	0.333333	0	0.166667	0.25	0.5	0.305556	NA	0.5	NA	NA	0.393939	0.44697	NA	0.5	NA	0.5	No	No	No	No	No	Yes	Yes	Yes	Yes	No
Atrx	chrX:132779619-132781678	0.387003	0	0.0699458	0.0648406	0.130447	0.4	0.100226	0	0	0.0334085	0.154456	0	0.0731453	0	0.0243818	0.615385	0.03885	0.221154	0.0117647	0.234197	0.22427	0.388883	0.241144	0.496587	0.375538	No	No	No	Yes	No	Yes	Yes	Yes	Yes	Yes
AU015836	chrX:91213995-91220809	NA	0	NA	0	0	NA	NA	NA	NA	NA	0.268975	NA	NA	NA	NA	NA	0.0638889	NA	NA	0.480769	0.272329	0.272727	NA	NA	0.272727	NA	NA	Yes	Yes	NA	NA	NA	NA	NA	No
AU022751	chrX:5658355-5660537	NA	NA	NA	NA	NA	NA	0	NA	NA	0	NA	NA	0	NA	0	NA	NA	1	NA	NA	1	0.5	0.133333	0.642857	0.425397	NA	NA	NA	NA	No	Yes	Yes	Yes	Yes	No
Avpr2	chrX:71137441-71139766	NA	NA	0.25	NA	0.25	NA	0.5	NA	NA	0.5	NA	NA	NA	NA	NA	NA	NA	NA	NA	NA	NA	0.688889	NA	NA	0.688889	Yes	NA	NA	Yes	NA	Yes	Yes	NA	NA	No
B230206F22Rik	chrX:100756249-100812293	NA	NA	0	0.8	0.4	0	NA	NA	NA	NA	NA	NA	NA	0.8	0.8	0.676471	NA	0.642857	0.875	0.868421	0.765687	0.5	NA	0.403846	0.451923	NA	No	Yes	No	NA	NA	NA	No	NA	No
B630019K06Rik	chrX:8469479-8472103	0	0	NA	NA	0	NA	NA	NA	NA	NA	NA	NA	NA	NA	NA	NA	NA	NA	NA	NA	NA	NA	NA	NA	NA	NA	NA	NA	NA	NA	NA	NA	NA	NA	NA
BC022960	chrX:165,806,837-165,808,072	NA	NA	NA	NA	NA	NA	NA	NA	NA	NA	NA	NA	NA	NA	NA	NA	NA	NA	0.687335	NA	0.687335	NA	NA	NA	NA	NA	NA	NA	NA	NA	NA	NA	NA	NA	NA
BC023829	chrX:68809168-68813829	NA	0	0	0.0287883	0.0095961	0	0.0945339	0.00384615	0	0.0327933	0	0	0	0	0	NA	0	0	0	0.292441	0.0731102	0.581742	0.119812	0.568407	0.42332	No	No	No	Yes	No	No	Yes	No	Yes	No
BC065397	chrX:133277496-133337900	0	NA	NA	0	0	0	NA	NA	NA	NA	NA	NA	NA	NA	NA	NA	0.5	NA	0	NA	0.25	0	NA	NA	0	NA	NA	Yes	No	NA	NA	NA	NA	NA	No
Bcap31	chrX:70931522-70961514	0.332822	0.00172861	0.0857927	0.181416	0.15044	0	0.233683	0	0.151847	0.12851	0.268067	0.000706215	0.177966	0.155951	0.111541	0.399882	0.363829	0.39212	0.402054	0.312825	0.374142	0.489933	0.431907	0.473543	0.465127	No	No	Yes	Yes	No	Yes	Yes	Yes	Yes	No
Bcor	chrX:11613864-11657679	0.484057	0	NA	0.222439	0.235498	NA	NA	NA	NA	NA	NA	0	NA	NA	0	0	0	NA	NA	NA	0	0.387097	0.403846	NA	0.395471	NA	NA	No	Yes	NA	NA	NA	NA	NA	No
Bcorl1	chrX:45694535-45759905	NA	NA	NA	NA	NA	NA	NA	NA	NA	NA	NA	NA	NA	NA	NA	NA	0	NA	NA	NA	0	NA	NA	NA	NA	NA	NA	NA	NA	NA	NA	NA	NA	NA	NA
Bex1	chrX:132748511-132750052	0	0.163609	NA	0	0.0545362	NA	0.400585	NA	0.194613	0.297599	0.681482	NA	0	NA	0	NA	0.330751	0.421482	0.556344	0	0.327144	0.513361	0.618301	0.47835	0.536671	Yes	No	Yes	Yes	No	No	Yes	Yes	Yes	No
Bex2	chrX:132,601,104-132,602,775	0.122711	0	NA	NA	0.0613553	NA	NA	NA	NA	NA	NA	NA	NA	NA	NA	NA	0	NA	NA	NA	0	0.498805	NA	0.474297	0.486551	NA	NA	No	Yes	NA	NA	NA	NA	NA	No
Bgn	chrX:70728974-70741275	NA	0	NA	0	0	0	NA	NA	0	0	0	NA	0	0	0	NA	0	NA	NA	NA	0	NA	0	NA	0	No	No	No	No	No	No	No	No	No	No
Bhlhb9	chrX:132420390-132425620	0.748357	NA	NA	NA	0.748357	0	0.05	0	0	0.0166667	NA	0	0	0.1	0.0333333	NA	0.5625	NA	NA	NA	0.5625	0.0625	0.0830931	0.820491	0.322028	No	No	No	No	No	Yes	Yes	Yes	Yes	No
Brcc3	chrX:72661967-72701040	0.133333	0	0.012987	0.0122655	0.0396465	0	0.155738	0	0.0391061	0.064948	0.0118153	0	0.0714286	0.206522	0.0926501	0.833333	0.384649	0.492958	0.468354	0.363636	0.508586	0.518519	0.457143	0.52	0.498554	No	No	Yes	Yes	No	Yes	Yes	Yes	Yes	No
Brwd3	chrX:105931184-106029685	NA	NA	0.185185	0.05	0.117593	NA	0	NA	0	0	0	NA	NA	NA	NA	NA	NA	NA	NA	NA	NA	NA	NA	NA	NA	No	NA	NA	NA	NA	NA	NA	NA	NA	NA
Btk	chrX:131076880-131117679	NA	NA	NA	0.192308	0.192308	0	0	NA	0.0628571	0.0314286	NA	NA	0.09375	0.130435	0.112092	0	NA	0	NA	0.0833333	0.0277778	NA	0.147783	NA	0.147783	No	No	No	No	No	No	Yes	No	No	No
C1galt1c1	chrX:35983960-35988320	0	0.0185185	0	0.052381	0.0177249	0	0	0	0	0	0.0526316	0	0	0	0	0.3	0.0521886	0.168124	0.224311	0	0.148925	0.438776	0.223333	0.527778	0.396629	No	No	Yes	Yes	No	Yes	Yes	Yes	Yes	Yes
C330007P06Rik	chrX:34388538-34404241	0.22	0	0.249822	0.246618	0.17911	NA	0.233148	0	0.371615	0.201588	0.132233	0	0.260084	0.251675	0.170586	0.595238	0.213028	0.394086	0.237229	0.357228	0.359362	0.470902	0.267882	0.403531	0.380771	No	No	Yes	Yes	No	Yes	Yes	Yes	Yes	No
C430049B03Rik	chrX:50407970-50410367	0	0	0	0.00265957	0.000664894	NA	0	0	0	0	0.253762	0.00347222	0.00208333	0	0.00185185	0.613636	0.186389	NA	NA	0	0.266675	0.345211	0.0674603	0.48398	0.298884	No	No	Yes	Yes	No	Yes	Yes	Yes	Yes	No
C77370	chrX:101272774-101396456	NA	0	0	0.0571652	0.0190551	NA	0.0896472	0	0	0.0298824	0.35905	0	0.150145	0.271542	0.140562	0.5	NA	NA	NA	NA	0.5	NA	0.564156	NA	0.564156	No	Yes	Yes	Yes	Yes	Yes	Yes	Yes	Yes	No
Cacna1f	chrX:7184229-7212322	NA	NA	NA	0	0	NA	NA	NA	NA	NA	0	NA	NA	NA	NA	NA	NA	NA	NA	NA	NA	NA	NA	NA	NA	NA	NA	NA	NA	NA	NA	NA	NA	NA	NA
Capn6	chrX:140236780-140261955	NA	0	0.916667	NA	0.458333	NA	0.00909091	NA	NA	0.00909091	0.086206	0	NA	NA	0	NA	0	NA	NA	0.1822	0.0911001	0.431041	0.125	0.420185	0.325409	No	No	No	No	No	No	Yes	No	Yes	No
Car5b	chrX:160414754-160465942	NA	0	NA	NA	0	NA	NA	0	NA	0	0	NA	NA	NA	NA	NA	NA	NA	NA	NA	NA	NA	NA	NA	NA	No	NA	Yes	NA	NA	NA	NA	NA	NA	NA
Cask	chrX:13094206-13423667	NA	NA	NA	NA	NA	NA	NA	0	NA	0	NA	NA	0	NA	0	NA	NA	NA	0	NA	0	NA	NA	NA	NA	NA	NA	NA	NA	No	No	Yes	No	Yes	NA
Ccdc120	chrX:7308840-7318450	0	NA	NA	0	0	NA	0	0.2	0	0.0666667	0.857143	NA	NA	NA	NA	1	0.333442	NA	0.333333	NA	0.555592	0.366667	0.470626	NA	0.418646	No	NA	Yes	Yes	NA	Yes	Yes	NA	NA	No
Ccdc160	chrX:50144199-50152229	NA	0	0	0.244565	0.0815217	NA	0.183903	0	NA	0.0919516	0.238442	0	0.0108696	0.307692	0.106187	NA	NA	0.45	NA	0.223214	0.336607	NA	0.188068	NA	0.188068	No	No	Yes	Yes	No	Yes	No	Yes	No	No
Ccdc22	chrX:133515655-133572841	0	NA	0	0	0	0	0.162232	0	0	0.0540775	0.260678	0	0.0840665	0.13265	0.0722388	0	0.177282	0.305764	0.383117	0.348314	0.242895	0.5	0.474878	0.551923	0.508934	No	No	Yes	Yes	No	Yes	Yes	Yes	Yes	Yes
Cd40lg	chrX:54465320-54477219	NA	NA	NA	NA	NA	0	NA	NA	NA	NA	NA	NA	NA	NA	NA	NA	NA	NA	NA	NA	NA	NA	NA	NA	NA	NA	NA	NA	NA	NA	NA	NA	NA	NA	NA
Cd99l2	chrX:39148171-39265078	NA	NA	0.173214	0	0.0866071	NA	0	0.326389	0	0.108796	NA	0	0	NA	0	NA	0	NA	NA	0	0	NA	NA	NA	NA	No	No	No	Yes	No	No	Yes	No	Yes	NA
Cdk16	chrX:20265619-20277003	0.109375	0.00301205	0.173783	0.281657	0.141957	0	0.33352	0	0.0450048	0.126175	0.184148	0	0.15097	0.151996	0.100989	0.245496	0.357519	0.379454	0.496049	0.426133	0.38093	0.369763	0.468866	0.38148	0.406703	No	No	Yes	Yes	No	Yes	Yes	Yes	Yes	No
Cenpi	chrX:130842702-130897178	0.608054	NA	0.00243902	0.118207	0.2429	NA	0.0611299	0	0.103803	0.0549776	0.260848	0.00502646	0.0624019	0.0742975	0.047242	0.496641	0.268794	0.282547	0.606283	0.302768	0.391407	0.41064	0.473082	0.492273	0.458665	No	No	Yes	Yes	No	Yes	Yes	Yes	Yes	No
Cetn2	chrX:70158904-70163683	NA	NA	0.0714286	NA	0.0714286	0	NA	NA	NA	NA	0	NA	NA	NA	NA	NA	NA	NA	NA	0.916667	0.916667	0.357143	NA	NA	0.357143	Yes	NA	Yes	Yes	NA	NA	NA	NA	NA	No
Cfp	chrX:20502661-20508650	0	0	0	0	0	0.00212782	0.0046729	0	0	0.00155763	0	0	0.00184502	0	0.000615006	0.00105932	0.0030303	0	0.00248576	0	0.00131508	0.406273	0.00555556	0.315789	0.242539	No	No	No	Yes	No	No	Yes	No	Yes	Yes
Chic1	chrX:100551815-100591457	0	0	NA	NA	0	NA	NA	NA	NA	NA	NA	NA	NA	NA	NA	NA	NA	NA	NA	NA	NA	NA	NA	NA	NA	Yes	NA	NA	NA	NA	NA	NA	NA	NA	NA
Chm	chrX:110154201-110299124	0	0	0	0	0	NA	0.4	0	0	0.133333	0.0833333	0	0.0497159	0.264045	0.104587	0.145455	0	NA	0.320165	0.401227	0.216712	0.4	0.252581	0.381624	0.344735	Yes	Yes	Yes	Yes	No	No	Yes	Yes	Yes	No
Chrdl1	chrX:139731701-139828805	NA	NA	NA	NA	NA	0	NA	NA	NA	NA	NA	NA	NA	NA	NA	NA	NA	NA	NA	NA	NA	NA	NA	NA	NA	NA	NA	NA	NA	NA	NA	NA	NA	NA	NA
Chst7	chrX:19636696-19674646	NA	0	NA	0	0	NA	NA	NA	0	0	NA	NA	NA	NA	NA	NA	NA	NA	NA	0	0	NA	NA	NA	NA	No	NA	No	NA	NA	No	Yes	NA	NA	NA
Cited1	chrX:99442721-99447468	0.00125237	0	0.157144	0.149015	0.0768527	NA	0.242112	0	0	0.0807039	0.340741	0	0	0.0423077	0.0141026	1	0.252845	0.574832	0.970196	0.224322	0.604439	0.493389	0.414824	0.613586	0.507266	No	No	Yes	Yes	No	Yes	Yes	Yes	Yes	No
Clcn5	chrX:6735945-6765840	NA	0	0	0.207716	0.0692386	NA	0	NA	1	0.5	NA	NA	0.102564	0.309848	0.206206	NA	NA	NA	NA	NA	NA	NA	NA	0.5829	0.5829	Yes	NA	NA	Yes	No	NA	NA	NA	NA	No
Col4a5	chrX:137909962-138123778	NA	NA	NA	NA	NA	0	NA	NA	NA	NA	NA	NA	0	NA	0	0	NA	NA	NA	NA	0	NA	0	NA	0	NA	NA	NA	NA	NA	NA	NA	NA	NA	No
Col4a6	chrX:137599946-137908619	NA	NA	NA	NA	NA	0	NA	NA	NA	NA	0	NA	NA	NA	NA	NA	NA	NA	NA	NA	NA	NA	NA	NA	NA	NA	NA	NA	NA	NA	NA	NA	NA	NA	NA
Cox7b	chrX:103211039-103217789	0.139758	0	0.0368266	0.0514464	0.0570077	0.0330971	0.170439	0.00259866	0.0296464	0.0675613	0.0291767	0	0.0545229	0.0668066	0.0404431	0.16247	0.0797183	0.115761	0.0973047	0.1072	0.112491	0.460209	0.187331	0.446591	0.36471	No	No	No	Yes	No	No	Yes	No	Yes	Yes
Cstf2	chrX:130593888-130621360	0.0669606	0.0246914	0.199	0.152603	0.110814	0	0.308209	0.0208333	0.0141844	0.114409	0.181144	0.0144168	0.107194	0.143419	0.0883432	0.569432	0.353842	0.275877	0.567992	0.190116	0.391452	0.530757	0.484389	0.456659	0.490602	No	No	Yes	Yes	No	Yes	Yes	Yes	Yes	No
Ctps2	chrX:159339492-159472473	0.316225	0	0	0.14841	0.116159	0	0.185271	0	0.00287356	0.0627148	0.00676886	0.00222222	0.201142	0.148196	0.117187	0.318888	0.145949	0.167105	0	0.0933698	0.145062	0.328924	0.452792	0.429598	0.403771	No	No	No	Yes	No	No	Yes	No	Yes	Yes
Cul4b	chrX:35884793-35929373	0.470959	0.0541667	0.0864699	0.203506	0.203776	NA	0.187575	0.05	0.829295	0.355623	0.178726	0.0844156	0.292195	0.265011	0.213874	0.213277	0.322917	0.685549	0.371364	0.349524	0.388526	0.421939	0.534121	0.419198	0.458419	Yes	No	Yes	Yes	No	No	Yes	Yes	Yes	No
Cxcr3	chrX:98926875-98929486	0	NA	NA	0	0	0	NA	NA	NA	NA	NA	NA	NA	0	0	NA	NA	0	NA	0	0	0.255051	NA	NA	0.255051	NA	NA	No	Yes	NA	NA	NA	NA	NA	No
Cxx1a	chrX:50945665-50946940	0	0	NA	NA	0	0	0	0	0	0	0	0	0	0	0	NA	NA	NA	0	0.191667	0.0958333	0.633333	0	0.394958	0.342764	No	No	No	Yes	No	No	Yes	No	Yes	No
Cxx1b	chrX:50972354-50973585	0.178906	0.274725	NA	NA	0.226816	0.0865233	0.123954	0.272727	1	0.46556	0.0746584	0.152778	0.0526316	0.269481	0.158297	0	0.0499109	NA	NA	0.159357	0.0697559	0.636364	0.0743034	0.363636	0.358101	Yes	No	No	Yes	No	No	No	No	Yes	No
Cxx1c	chrX:70961936-70983626	0.108654	NA	NA	0.3	0.204327	0.0707601	0.125	NA	1	0.5625	0.0921489	0.666667	0.107692	0.0837209	0.286027	NA	0.0396825	NA	NA	NA	0.0396825	0.227273	0.148148	0.727273	0.367565	Yes	No	No	Yes	No	No	No	No	No	No
Cybb	chrX:9012378-9046450	0.05	0.0434783	0.03125	0.0351852	0.0399784	0.04	0.25	0.108333	0.047619	0.135317	NA	0.333333	0.0333333	0.0454545	0.137374	0.0321468	0.0538462	0.0344828	0.0390305	0.0416667	0.0402346	0.342299	0.0357143	0.379004	0.252339	No	No	No	Yes	No	No	Yes	No	Yes	Yes
Cysltr1	chrX:103771848-103799018	NA	NA	NA	0	0	NA	NA	NA	0	0	NA	NA	NA	NA	NA	NA	NA	NA	NA	NA	NA	NA	NA	NA	NA	No	NA	NA	NA	NA	NA	NA	NA	NA	NA
Dach2	chrX:110411865-110949995	0	NA	NA	NA	0	NA	NA	NA	NA	NA	NA	NA	NA	NA	NA	NA	NA	NA	NA	NA	NA	NA	NA	NA	NA	NA	NA	NA	NA	NA	NA	NA	NA	NA	NA
Dcaf12l1	chrX:42139749-42143328	0	NA	0	0	0	NA	0.0702277	0	0	0.0234092	0	0	0.0279341	0	0.00931137	NA	NA	NA	NA	NA	NA	NA	0.25404	NA	0.25404	No	NA	NA	Yes	No	NA	NA	NA	NA	No
Ddx26b	chrX:153881886-153929978	0	NA	NA	NA	0	NA	NA	NA	0	0	NA	NA	0	0	0	NA	NA	NA	NA	NA	NA	NA	0	NA	0	No	NA	NA	No	No	NA	NA	NA	NA	No
Ddx3x	chrX:34748497-34751036	0.498785	0	0.428374	0.323297	0.312614	NA	0.348164	0	0.456991	0.268385	0.0771027	0	0.259341	0.305737	0.188359	0.3014	0.138067	0.317026	0.549484	0.266888	0.314573	0.535597	0.55045	0.680502	0.58885	No	No	No	Yes	No	No	Yes	Yes	Yes	Yes
Dgkk-2	chrX:6356432-6525489	NA	0	NA	NA	0	NA	NA	NA	NA	NA	NA	NA	NA	NA	NA	NA	NA	NA	NA	NA	NA	NA	NA	NA	NA	NA	NA	NA	NA	NA	NA	NA	NA	NA	NA
Diap2	chrX:165806121-165808072	NA	0.1	0	0.111765	0.0705882	0.125	0.153846	0	0.0833333	0.0790598	0.415377	0	0.052381	0.342857	0.131746	0.776914	NA	NA	NA	0	0.388457	NA	0.408501	NA	0.408501	No	No	Yes	Yes	No	Yes	Yes	Yes	Yes	No
Dkc1	chrX:72341193-72355115	0.122509	0	0.289162	0.309879	0.180388	0	0.370707	0	0.364903	0.245203	0.361914	0.000992063	0.155118	0.326465	0.160858	0.538191	0.532114	0.575865	0.602053	0.324941	0.514633	0.493489	0.397577	0.505239	0.465435	No	No	Yes	Yes	No	Yes	Yes	Yes	Yes	No
Dlg3	chrX:97963062-98013749	NA	0	0	0	0	0	0.114542	0	NA	0.0572712	0	0	0.0289808	0.01	0.0129936	0.436233	0.397439	0.510529	0.473157	0.614678	0.486407	0.6	0.22664	NA	0.41332	No	No	Yes	Yes	No	Yes	Yes	Yes	Yes	No
Dmd	chrX:80194209-82450389	NA	0	NA	0	0	NA	0	NA	0.609375	0.304688	NA	NA	NA	0	0	NA	NA	NA	NA	NA	NA	NA	NA	NA	NA	Yes	NA	NA	NA	No	NA	NA	NA	NA	NA
Dmrtc1a	chrX:100098560-100104026	NA	NA	NA	NA	NA	0.5	NA	NA	NA	NA	NA	NA	NA	NA	NA	NA	NA	NA	NA	NA	NA	NA	NA	NA	NA	NA	NA	NA	NA	NA	NA	NA	NA	NA	NA
Dnase1l1	chrX:71518556-71527672	NA	NA	0	0	0	0	NA	NA	0.0102041	0.0102041	0.0294118	NA	0	0.2	0.1	0.121078	0.606754	0.467668	0	0.345358	0.308172	NA	NA	0.384615	0.384615	No	No	Yes	Yes	No	Yes	Yes	Yes	Yes	No
Dock11	chrX:33428827-33616557	NA	NA	NA	NA	NA	0	NA	NA	NA	NA	NA	NA	NA	NA	NA	NA	NA	NA	NA	0	0	NA	0.4	NA	0.4	NA	NA	NA	NA	NA	NA	NA	NA	NA	No
Dusp9	chrX:70884780-70888853	1	0.25	0.166667	0.263158	0.419956	NA	0.333333	0.25	0.25	0.277778	0.262653	0.166667	0.25	0.25	0.222222	NA	0.257143	NA	NA	NA	0.257143	0.492205	NA	0.484116	0.48816	No	No	No	No	No	No	Yes	No	Yes	No
Dynlt3	chrX:9231396-9240109	0.5	0.5	0.5	0.5	0.5	0.5	0.5	0.494737	0.5	0.498246	0.501597	0.5	0.5	0.5	0.5	0.5	0.5	0.5	0.5	0.5	0.5	0.5	0.5	0.5	0.5	No	No	No	No	No	No	No	No	No	No
E530001F21Rik	chrX:102359717-102360844	NA	1	0.25	1	0.75	NA	1	1	0.142857	0.714286	0.25	1	1	1	1	1	1	0.220899	0.25	0.666667	0.627513	NA	1	NA	1	No	Yes	No	Yes	Yes	No	Yes	No	No	No
Ebp	chrX:7762457-7770638	0.189809	0	0.150994	0.124706	0.116377	0	0.219841	0	0.161739	0.127193	0.19619	0	0.14697	0.164545	0.103838	0.165563	0.160186	0.364182	0.286454	0.0357345	0.202424	0.452951	0.4054	0.496836	0.451729	No	No	No	Yes	No	No	Yes	No	Yes	Yes
Eda	chrX:97170945-97596099	NA	NA	NA	NA	NA	NA	NA	NA	0	0	0	NA	NA	NA	NA	NA	NA	0.416667	NA	NA	0.416667	NA	NA	NA	NA	NA	NA	NA	NA	NA	Yes	Yes	NA	NA	NA
Eda2r	chrX:94529180-94572548	NA	NA	NA	NA	NA	NA	0.1	NA	NA	0.1	NA	NA	NA	NA	NA	0.631868	0.155786	0.36321	0.497235	0.689481	0.467516	NA	NA	NA	NA	NA	NA	NA	NA	NA	Yes	Yes	NA	NA	NA
Efhc2	chrX:16709175-16897067	NA	NA	NA	0	0	NA	NA	NA	NA	NA	NA	NA	NA	NA	NA	NA	NA	NA	NA	NA	NA	NA	NA	0.764706	0.764706	Yes	NA	Yes	Yes	NA	NA	NA	NA	NA	No
Efnb1	chrX:98986914-98989762	NA	0	0	0	0	NA	0	0	0.0166667	0.00555556	0	0	0	0	0	NA	0	NA	NA	0	0	0.448782	0.291889	0.27682	0.339164	No	No	No	Yes	No	No	Yes	No	Yes	No
Egfl6	chrX:162960939-163023648	NA	NA	NA	NA	NA	NA	NA	NA	NA	NA	1	NA	NA	NA	NA	NA	1	NA	NA	0.991453	0.995726	NA	NA	NA	NA	NA	NA	NA	NA	NA	NA	NA	NA	NA	NA
Eif1ax	chrX:155810127-155823631	0.407467	0	0.132605	0.198167	0.18456	0	0.250047	0.000816993	0.0629422	0.104602	0.125418	0	0.128305	0.234615	0.120973	0.205453	0.172031	0.142187	0.363348	0.215093	0.219623	0.477411	0.313155	0.463661	0.418076	No	No	No	Yes	No	Yes	Yes	No	Yes	Yes
Eif2s3x	chrX:91434048-91457990	NA	NA	0.883333	0.639286	0.76131	NA	0.839852	0.05	0.679785	0.523212	0.817949	0	0.695455	0.72681	0.474088	0.924242	0.712312	0.702303	0.755102	0.789474	0.776687	0.941176	0.803904	0.904762	0.883281	No	No	No	Yes	No	Yes	Yes	Yes	Yes	No
Elf4	chrX:45764226-45816309	NA	NA	NA	0	0	NA	NA	0	0	0	NA	NA	0	0	0	NA	NA	NA	NA	0.675	0.675	NA	0.0916667	NA	0.0916667	No	No	Yes	No	No	Yes	No	Yes	No	No
Elk1	chrX:20510521-20527726	NA	0	NA	0.4	0.2	NA	0.5	NA	NA	0.5	0.0527473	NA	0	NA	0	NA	0.291667	NA	NA	0.111111	0.201389	NA	0.2	NA	0.2	Yes	No	No	No	No	No	No	Yes	Yes	No
Emd	chrX:71500178-71503086	0.265987	0	0.41607	0.232255	0.228578	0.0454545	0.250081	0	0.283617	0.177899	0.26426	0	0.158228	0.185484	0.114571	0.438502	0.538229	0.503892	0.498399	0.418137	0.479432	0.393956	0.405091	0.672678	0.490575	No	No	Yes	Yes	No	Yes	Yes	Yes	Yes	No
Enox2	chrX:46363699-46641419	NA	0	NA	NA	0	NA	NA	NA	NA	NA	NA	NA	NA	NA	NA	NA	NA	NA	NA	NA	NA	NA	NA	NA	NA	NA	NA	NA	NA	NA	NA	NA	NA	NA	NA
Eras	chrX:7501402-7505733	0.195722	NA	0	NA	0.0978612	NA	NA	NA	0.534007	0.534007	NA	NA	NA	NA	NA	NA	NA	NA	NA	NA	NA	NA	NA	0.425214	0.425214	Yes	NA	NA	Yes	NA	NA	NA	NA	NA	No
Ercc6l	chrX:99338159-99352430	0.0517241	0	0.193835	0.0962163	0.085444	NA	0.260188	0	1	0.420063	0.49158	0	0.306019	0.317895	0.207971	NA	0.229256	0.278649	0	0.448103	0.239002	0.510966	0.490416	0.413716	0.471699	Yes	Yes	Yes	Yes	No	No	No	No	Yes	No
F630028O10Rik	chrX:93435265-93438981	NA	NA	NA	0	0	NA	NA	NA	0	0	NA	NA	0	0	0	0	0	0	0	NA	0	0	0	NA	0	No	No	No	No	No	No	No	No	No	No
F8	chrX:72418056-72625380	NA	NA	NA	NA	NA	NA	NA	NA	NA	NA	NA	NA	NA	NA	NA	0	NA	NA	NA	NA	0	NA	NA	NA	NA	NA	NA	NA	NA	NA	NA	NA	NA	NA	NA
F8a	chrX:70473645-70476134	0	0	NA	0	0	0	0	0	NA	0	0.228571	0	0	NA	0	0	0.133333	0.0833333	NA	NA	0.0722222	NA	0.333333	0.269231	0.301282	No	No	No	Yes	No	No	Yes	No	Yes	No
Fam120c	chrX:147778766-147908677	NA	NA	NA	NA	NA	NA	NA	NA	0	0	NA	NA	NA	NA	NA	NA	NA	NA	NA	NA	NA	NA	NA	NA	NA	NA	NA	NA	NA	NA	NA	NA	NA	NA	NA
Fam122b	chrX:50596592-50622982	0.322581	0.0142857	0.0145349	0	0.0878503	NA	0.197348	0.00460829	0	0.0673189	0.0337037	0	0	0	0	0.138889	0.252306	0	NA	0	0.0977987	0.379246	0.384615	0.561667	0.441843	No	No	No	Yes	No	No	Yes	No	Yes	No
Fam123b	chrX:92615653-92640179	NA	0	NA	NA	0	0	NA	0	0	0	0	NA	NA	NA	NA	0	NA	NA	NA	NA	0	NA	NA	0.334957	0.334957	No	NA	No	Yes	NA	No	Yes	NA	NA	No
Fam3a	chrX:71630059-71638478	NA	0	0.411905	0.337011	0.249639	0	0.222222	0	NA	0.111111	0.29252	0	0.34335	0.19441	0.179253	0.683333	0.406223	0.373043	0.590278	0.316724	0.47392	0.475269	0.239565	0.563492	0.426109	No	No	Yes	Yes	No	Yes	Yes	Yes	Yes	No
Fam70a	chrX:35550478-35605658	NA	NA	0	NA	0	NA	NA	NA	NA	NA	NA	NA	0	NA	0	NA	NA	NA	NA	NA	NA	NA	NA	NA	NA	Yes	NA	NA	NA	NA	NA	NA	NA	NA	NA
Fancb	chrX:161418524-161435204	NA	0	0	0.286932	0.0956439	NA	0.0666667	0	0	0.0222222	0	NA	NA	NA	NA	NA	NA	0.321683	NA	0	0.160842	0.400568	0.477009	0.46521	0.447596	No	NA	No	Yes	NA	Yes	Yes	NA	NA	No
Fgd1	chrX:53599577-53618851	0	0	NA	0.10243	0.0341432	NA	0.0783245	0	1	0.359442	0	0	0.0954516	0.042791	0.0460809	NA	0.4315	NA	0	0	0.143833	0.307692	0.275	0.471429	0.351374	Yes	No	Yes	Yes	No	No	No	No	Yes	No
Fgf13	chrX:56315328-56387613	NA	NA	NA	NA	NA	NA	NA	NA	0	0	NA	NA	NA	NA	NA	NA	NA	NA	NA	NA	NA	NA	NA	NA	NA	NA	NA	NA	NA	NA	NA	NA	NA	NA	NA
Fhl1	chrX:53984964-54046523	0.015625	0	0	NA	0.00520833	0	0	0	0	0	0	0	0	0	0	0	0	NA	0	NA	0	0.266234	0.024812	0.297374	0.19614	No	No	No	Yes	No	No	Yes	No	Yes	No
Figf	chrX:160811480-160840579	NA	NA	NA	NA	NA	NA	NA	NA	NA	NA	NA	NA	NA	NA	NA	NA	0.546853	NA	NA	NA	0.546853	NA	0	NA	0	NA	NA	NA	NA	NA	NA	NA	NA	NA	No
Flna	chrX:131071797-131076168	0.00357027	0	0	0.0322387	0.00895224	0.0153061	0.0123457	0	0.00669118	0.00634562	0.08625	0	0.0675764	0.0718703	0.0464822	0.2	0.366268	0.166667	0	0.015625	0.149712	0.486713	0.10545	0.428713	0.340292	No	No	Yes	Yes	No	Yes	Yes	Yes	Yes	Yes
Fmr1	chrX:65931730-65971138	NA	NA	0.250461	0.516447	0.383454	NA	NA	0	NA	0	0.484848	0.238095	0.339506	0.424644	0.334082	NA	0.200893	NA	0.513986	0.471665	0.395515	0.708899	0.556782	0.421962	0.562548	No	No	No	Yes	Yes	Yes	Yes	No	Yes	No
Fmr1nb	chrX:66015014-66057735	0.128001	0	0.000469484	0	0.0321175	NA	0.0150758	0	0.000566572	0.00521413	0.1983	0	0	0.00490983	0.00163661	0.450855	1	0.152244	0.54844	0.735397	0.577387	0.339508	0.275546	0.551018	0.388691	No	No	Yes	Yes	No	Yes	Yes	Yes	Yes	No
Foxo4	chrX:98449867-98456212	0.47619	NA	0	NA	0.238095	NA	NA	NA	NA	NA	NA	NA	NA	NA	NA	NA	NA	NA	NA	NA	NA	NA	NA	NA	NA	NA	NA	Yes	NA	NA	NA	NA	NA	NA	NA
Foxp3	chrX:7156802-7172369	NA	0	NA	NA	0	NA	NA	NA	NA	NA	NA	NA	NA	NA	NA	NA	NA	NA	NA	NA	NA	NA	NA	NA	NA	NA	NA	Yes	NA	NA	NA	NA	NA	NA	NA
Frmd7	chrX:48245822-48295887	0	0	NA	NA	0	NA	NA	NA	0	0	NA	NA	NA	NA	NA	NA	NA	NA	NA	NA	NA	NA	NA	NA	NA	No	NA	Yes	NA	NA	NA	NA	NA	NA	NA
Ftsj1	chrX:7815794-7829532	0.334943	0	0.252191	0.305124	0.223065	0	0.32715	0	0.00129199	0.109481	0.141286	0	0.127674	0.172244	0.0999726	0.224445	0.0551718	0.362921	0.239152	0.103458	0.19703	0.453996	0.345182	0.50498	0.434719	No	No	No	Yes	No	No	Yes	No	Yes	Yes
Fundc1	chrX:17133695-17149423	0.0632324	0	0.215271	0.207285	0.121447	0.00252525	0.273562	0.00382458	0.0956367	0.124341	0.0703395	0	0.188866	0.237795	0.14222	0.0493793	0.129981	0.0791525	0.221291	0.13122	0.122205	0.464597	0.291079	0.490876	0.415518	No	No	No	Yes	No	No	Yes	No	Yes	Yes
Fundc2	chrX:72627738-72642497	0	0	0	0	0	0	0	0	0	0	0.075303	0	0	0.128571	0.0428571	0	0.211111	0.172222	0.591667	0	0.195	0.31526	0.271579	0.385691	0.324177	No	No	Yes	Yes	No	Yes	Yes	Yes	Yes	Yes
G530011O06Rik	chrX:166412975-166416849	NA	0.0340136	0	0.527972	0.187329	NA	NA	0.0487179	NA	0.0487179	0.15625	NA	0.5	NA	0.5	NA	0.5	NA	0.5	NA	0.5	NA	NA	0.5	0.5	No	Yes	Yes	Yes	Yes	Yes	Yes	No	No	No
G6pdx	chrX:71654825-71674500	0	0	0.130755	0.0663095	0.049266	0	0.155944	0	0	0.0519815	0.172342	0	0.117481	0.179648	0.0990429	0.297921	0.324738	0.301685	0.23993	0.49553	0.331961	0.445965	0.401279	0.410085	0.41911	No	No	Yes	Yes	No	Yes	Yes	Yes	Yes	No
Gabra3	chrX:69678015-69901585	NA	NA	NA	NA	NA	NA	NA	NA	NA	NA	NA	NA	NA	NA	NA	NA	NA	NA	NA	0	0	NA	NA	NA	NA	NA	NA	NA	NA	NA	NA	NA	NA	NA	NA
Gata1	chrX:7536386-7544941	0	0	0	0.116687	0.0291717	NA	0.1225	0.1	NA	0.11125	0.12037	0	0.213578	0.300797	0.171459	NA	0.28275	0.48442	0.634134	NA	0.467101	0.412972	NA	NA	0.412972	No	Yes	Yes	Yes	No	Yes	Yes	Yes	Yes	No
Gdi1	chrX:71550351-71557206	0.382406	0.120833	0.675008	0.449403	0.406912	0.16383	0.584876	0.14	0.286733	0.337203	0.48811	0.0454545	0.461317	0.390345	0.299039	0.601736	0.742336	0.584315	0.637292	0.661831	0.645502	0.696919	0.527957	0.649033	0.624636	No	No	Yes	Yes	No	Yes	Yes	Yes	Yes	No
Gemin8	chrX:162608412-162628444	NA	NA	NA	0.060494	0.060494	0	0.0477778	0	0.0149502	0.0209093	0.0333333	0.012987	0.0920635	NA	0.0525253	NA	NA	NA	1	0.15	0.575	NA	0.336335	0.636364	0.48635	No	No	Yes	Yes	No	Yes	Yes	Yes	Yes	No
Gla	chrX:131122708-131135544	0.0410628	0.0592437	0.0327687	0.0737983	0.0517184	0	0.0137888	0.0641453	0.100906	0.0596133	0.100327	0.0242602	0.0727721	0.0770302	0.0580208	0.301133	0.136091	0.224884	0.278666	0.203989	0.228953	0.550325	0.47778	0.469691	0.499265	No	No	Yes	Yes	No	Yes	Yes	Yes	Yes	Yes
Gm14458	chrX:8,563,026-8,563,881	NA	NA	NA	NA	NA	NA	NA	NA	NA	NA	1	NA	NA	NA	NA	NA	NA	1	NA	NA	1	NA	NA	NA	NA	NA	NA	NA	NA	NA	NA	NA	NA	NA	NA
Gm14499	chrX:8620853-8621368	NA	NA	NA	1	1	NA	1	NA	NA	1	NA	NA	NA	NA	NA	NA	NA	NA	1	NA	1	1	NA	1	1	No	NA	No	No	NA	No	No	NA	NA	No
Gm14680	chrX:60028303-60029919	0	NA	0	0.0138889	0.00462963	NA	0	0	0	0	0.0323244	0	0.0751634	0.0384615	0.037875	NA	NA	NA	NA	NA	NA	0.295553	0	0.350379	0.215311	No	NA	Yes	Yes	No	NA	NA	NA	NA	No
Gm15097	chrX:146,219,047-146,261,237	NA	NA	NA	NA	NA	NA	NA	NA	NA	NA	NA	NA	NA	NA	NA	NA	NA	NA	NA	NA	NA	NA	NA	1	1	NA	NA	NA	NA	NA	NA	NA	NA	NA	No
Gm1862	chrX:51186788-51187597	NA	NA	0	NA	0	NA	NA	NA	NA	NA	NA	NA	NA	NA	NA	NA	NA	NA	NA	NA	NA	NA	0	NA	0	Yes	NA	Yes	No	NA	NA	NA	NA	NA	No
Gm364	chrX:54662331-54741944	NA	NA	NA	NA	NA	NA	NA	NA	NA	NA	NA	0.025	NA	NA	0.025	NA	0.542446	0.22619	NA	0.641369	0.470002	0.56496	NA	0.720356	0.642658	NA	NA	NA	NA	NA	NA	NA	NA	NA	No
Gm4779	chrX:98989931-98993983	NA	0	0	NA	0	NA	0.671795	0	NA	0.335897	0.295095	0	0	NA	0	0.601195	0.197986	0.461042	0.683279	0.325471	0.453795	0.550128	0.640568	0.433442	0.541379	Yes	No	Yes	Yes	No	Yes	Yes	Yes	Yes	No
Gm4984	chrX:12,229,009-12,229,946	NA	NA	NA	NA	NA	NA	NA	NA	NA	NA	0.384615	NA	NA	NA	NA	NA	NA	NA	NA	NA	NA	NA	NA	NA	NA	NA	NA	NA	NA	NA	NA	NA	NA	NA	NA
Gm5634	chrX:8539260-8540101	NA	NA	NA	1	1	NA	1	NA	NA	1	NA	NA	1	1	1	NA	NA	NA	1	NA	1	NA	NA	1	1	No	No	No	No	No	No	No	No	No	No
Gm5635	chrX:8640216-8640948	0.116553	NA	NA	0.292881	0.204717	NA	0.799206	NA	1	0.899603	0.255728	0	0.9	1	0.633333	NA	0.846154	0.975	0.674286	0.97096	0.8666	1	0.552116	0.725118	0.759078	Yes	Yes	Yes	Yes	No	No	No	Yes	Yes	No
Gm5637	chrX:57298288-57299406	NA	1	0.0333333	0.272727	0.435354	1	0.916667	0.266667	0.292647	0.491993	0.48	1	0	0	0.333333	0.5	0.277778	0.55	0.645833	0.121212	0.418965	0.453216	0.0833333	0.416667	0.317739	No	No	No	No	No	No	No	No	No	No
Gm5643	chrX:138732048-138733780	NA	NA	NA	NA	NA	NA	NA	0.3	NA	0.3	NA	NA	NA	NA	NA	NA	NA	NA	NA	NA	NA	NA	NA	NA	NA	NA	NA	NA	NA	NA	NA	NA	NA	NA	NA
Gm5751	chrX:8451379-8457876	NA	NA	NA	NA	NA	0	NA	NA	NA	NA	NA	NA	NA	NA	NA	NA	NA	NA	NA	NA	NA	NA	NA	NA	NA	NA	NA	NA	NA	NA	NA	NA	NA	NA	NA
Gm5946	chrX:146651290-146663499	NA	NA	NA	NA	NA	NA	NA	NA	NA	NA	1	NA	NA	NA	NA	NA	NA	NA	NA	1	1	NA	1	NA	1	NA	NA	NA	NA	NA	NA	NA	NA	NA	No
Gm6036	chrX:72,389,027-72,389,809	NA	NA	NA	NA	NA	1	NA	NA	NA	NA	NA	NA	NA	NA	NA	NA	NA	NA	NA	NA	NA	NA	NA	NA	NA	NA	NA	NA	NA	NA	NA	NA	NA	NA	NA
Gm6222	chrX:100958256-100958884	1	NA	0.0152284	0.00657895	0.340602	NA	NA	0.0172414	0.724868	0.371055	0.71875	0.504808	0.512255	0.933333	0.650132	0.558333	0.01	1	NA	0.495743	0.516019	0.423077	1	0.636364	0.68648	No	Yes	Yes	Yes	Yes	Yes	Yes	No	No	No
Gm648	chrX:53797051-53802783	NA	NA	NA	NA	NA	NA	NA	NA	NA	NA	NA	NA	NA	NA	NA	NA	0	NA	NA	NA	0	NA	NA	0.454545	0.454545	NA	NA	NA	NA	NA	NA	NA	NA	NA	No
Gm6787	chrX:7,674,213-7,683,827	NA	NA	NA	NA	NA	0	NA	NA	NA	NA	NA	NA	NA	NA	NA	NA	NA	NA	NA	NA	NA	NA	NA	NA	NA	NA	NA	NA	NA	NA	NA	NA	NA	NA	NA
Gm6880	chrX:71725626-71726738	1	NA	0.755226	0.333131	0.696119	NA	0.637964	0	0.502503	0.380156	0.634112	0.0909091	NA	NA	0.0909091	0.0714286	0.842942	0.942216	1	0.818182	0.734954	0.61303	0.76805	0.692517	0.691199	No	No	No	No	No	Yes	Yes	Yes	Yes	No
Gm773	chrX:53443004-53466058	NA	NA	NA	NA	NA	NA	NA	NA	NA	NA	NA	NA	NA	NA	NA	NA	NA	1	1	NA	1	0.473684	NA	0.377778	0.425731	NA	NA	NA	NA	NA	NA	NA	NA	NA	No
Gm9	chrX:34748497-34751036	NA	0	0	0.0124251	0.00414169	NA	NA	0	NA	0	1	0.0133333	NA	NA	0.0133333	NA	0.166879	0	NA	0.0594356	0.0754382	0.425426	NA	0.439635	0.432531	No	No	No	Yes	No	No	Yes	No	Yes	No
Gm9112	chrX:99,902,227-99,903,009	0	NA	NA	NA	0	NA	NA	NA	NA	NA	NA	NA	NA	NA	NA	NA	0	NA	NA	NA	0	NA	NA	NA	NA	Yes	NA	No	NA	NA	NA	NA	NA	NA	NA
Gnl3l	chrX:147417676-147451865	0.0357143	0	0	0	0.00892857	0	0.0434174	0	NA	0.0217087	0	0	0.0580532	0	0.0193511	0.685606	0.666667	NA	1	0.0650856	0.60434	0.6	0.274171	0.433155	0.435776	No	No	Yes	Yes	No	Yes	Yes	Yes	Yes	No
Gpc3	chrX:49625603-49967151	NA	NA	NA	NA	NA	0	NA	NA	NA	NA	0	NA	0	0.05	0.025	0	NA	NA	NA	NA	0	0.502609	0.0714286	0.496555	0.356864	NA	NA	NA	NA	NA	NA	NA	NA	NA	No
Gpc4	chrX:49406195-49518100	NA	0	0	0	0	NA	NA	NA	NA	NA	NA	NA	NA	NA	NA	NA	NA	NA	NA	NA	NA	NA	NA	0.666667	0.666667	NA	NA	NA	Yes	NA	NA	NA	NA	NA	No
Gpkow	chrX:7274260-7287387	0.37013	NA	0.0593407	0.547968	0.325813	0.231354	0.497032	0.268351	0	0.255128	0.202463	0.197795	0.46952	0.530601	0.399305	NA	0.38284	0.646553	0.807281	0.279281	0.528989	0.692176	0.566469	0.751676	0.670107	No	No	Yes	Yes	Yes	Yes	Yes	Yes	Yes	No
Gpm6b	chrX:50911099-50912312	NA	NA	NA	NA	NA	NA	NA	NA	NA	NA	NA	NA	0	NA	0	NA	NA	NA	NA	NA	NA	NA	NA	NA	NA	NA	NA	NA	NA	NA	NA	NA	NA	NA	NA
Gpr173	chrX:148779189-148802654	NA	NA	NA	NA	NA	NA	NA	NA	NA	NA	0	NA	NA	NA	NA	NA	NA	NA	NA	NA	NA	NA	NA	NA	NA	NA	NA	NA	NA	NA	NA	NA	NA	NA	NA
Gpr34	chrX:13209812-13217984	0	NA	NA	NA	0	NA	NA	NA	NA	NA	NA	NA	NA	NA	NA	NA	NA	NA	NA	NA	NA	NA	0	NA	0	Yes	NA	Yes	No	NA	NA	NA	NA	NA	No
Gpr64	chrX:156828622-156936002	NA	NA	NA	NA	NA	0	NA	NA	NA	NA	NA	NA	NA	NA	NA	NA	NA	NA	NA	NA	NA	NA	NA	NA	NA	NA	NA	NA	NA	NA	NA	NA	NA	NA	NA
Gprasp1	chrX:132277231-132338007	NA	0	0.0363636	0.00757576	0.0146465	NA	0.346154	0	0	0.115385	0.116959	0	0.0375	0.0703704	0.0359568	NA	0.717391	0.55	0.666667	0.45	0.596014	0.571429	0.08	0.591855	0.414428	Yes	No	Yes	Yes	No	Yes	Yes	Yes	Yes	No
Gprasp2	chrX:132373573-132379269	NA	NA	NA	NA	NA	NA	NA	NA	NA	NA	NA	NA	NA	NA	NA	NA	NA	NA	NA	NA	NA	NA	0.5	NA	0.5	NA	NA	NA	NA	NA	NA	NA	NA	NA	No
Gripap1	chrX:61426723-61431953	0	0	0	0.119829	0.0299573	0	0.355003	0	0	0.118334	0.0653414	0	0.0526055	0.195934	0.0828466	0.435592	0.207075	0	0.342454	0.387691	0.274562	0.51295	0.468452	0.509084	0.496829	No	No	Yes	Yes	No	Yes	Yes	Yes	Yes	Yes
Gspt2	chrX:91881408-91883900	1	NA	NA	NA	1	0.5	NA	NA	NA	NA	NA	NA	NA	NA	NA	NA	NA	1	NA	NA	1	NA	NA	NA	NA	NA	NA	No	NA	NA	NA	NA	NA	NA	NA
Gyk	chrX:82947276-83022158	0	0	0.335051	0.111362	0.111603	NA	0.034127	0	0.00347222	0.0125331	0.372201	0	0.139292	0.172028	0.103773	0	0	0	0	NA	0	NA	0.671329	0.4544	0.562864	No	No	No	Yes	No	No	Yes	No	Yes	No
Haus7	chrX:70682654-70704368	0.0663643	0	0	0	0.0165911	0	0.0677516	0	0.446466	0.171406	0.0988417	0.0017094	0.107794	0	0.0365012	0.252322	0.102032	0.23892	0.321145	0.0820843	0.199301	0.447985	0.33727	0.476058	0.420438	Yes	No	Yes	Yes	No	No	Yes	Yes	Yes	Yes
Hccs	chrX:165749462-165758275	0	0	0.324574	0.363654	0.172057	NA	0.437183	0	0	0.145728	0.313777	0	0.418565	0.345943	0.254836	0.378023	0.376342	0.575803	0.454571	0.456115	0.448171	0.499354	0.389683	0.541599	0.476878	No	No	Yes	Yes	Yes	Yes	Yes	Yes	Yes	No
Hcfc1	chrX:71188134-71211654	0.230569	0	0.480168	0.272679	0.245854	NA	0.150784	0	0.0974576	0.0827471	0.129487	0	0.0360397	0.19787	0.0779699	0.563866	0.47465	0.266423	0.403244	0.217949	0.385226	0.493775	0.374285	0.523856	0.463972	No	No	Yes	Yes	No	Yes	Yes	Yes	Yes	No
Hdac6	chrX:7507248-7525015	0.463709	0	NA	0.391501	0.28507	NA	0.36442	0.0952381	0	0.153219	0.0940712	0.174655	0	0.212928	0.129194	0.00617284	0.700321	0.105263	0.246559	0	0.211663	0.468439	0.362993	0.419429	0.416954	No	No	No	Yes	No	No	Yes	No	Yes	Yes
Hdx	chrX:108688813-108810688	NA	NA	NA	NA	NA	NA	NA	NA	NA	NA	0	NA	NA	NA	NA	NA	NA	NA	NA	NA	NA	NA	NA	0.3875	0.3875	NA	NA	NA	NA	NA	NA	NA	NA	NA	No
Hmgb3	chrX:137074067-137135061	0	0.0298507	0.135714	0.0732894	0.0597136	0	0.189571	0.0268817	0.0320513	0.0828348	0.343059	0.0166667	0.287427	0.169415	0.157836	0.307692	0.147619	0.931818	0.262712	0.286354	0.387239	0.541496	0.519231	0.555686	0.538804	No	No	Yes	Yes	No	Yes	Yes	Yes	Yes	Yes
Hmgn5	chrX:48466671-48559009	NA	0	0.00833333	0.038961	0.0157648	NA	0	0	0	0	0.189655	0	0.0731707	0.154762	0.0759775	0.1	0.0666667	NA	NA	0.037037	0.0679012	0.535714	0.131579	NA	0.333647	No	No	No	Yes	No	No	Yes	No	Yes	No
Hnrnph2	chrX:131135825-131141593	0.101351	0.0543652	0.0537815	0.081618	0.072779	0.0659341	0.17508	0.0659751	0.1601	0.133718	0.135824	0.0591447	0.0809787	0.0965077	0.078877	0.214664	0.0697752	0.271264	0.148342	0.31142	0.203093	0.368357	0.286789	0.254404	0.303183	No	No	Yes	Yes	No	No	Yes	Yes	Yes	No
Hprt	chrX:50341255-50374837	0.143434	0	0.0728844	0.115805	0.083031	0	0.139878	0.000478927	0.136064	0.0921403	0.230907	0.000743024	0.122025	0.112087	0.078285	0.389999	0.178449	0.398608	0.437254	0.204089	0.32168	0.318957	0.359341	0.283339	0.320546	No	No	Yes	Yes	No	Yes	Yes	Yes	Yes	No
Hs6st2	chrX:48740389-49034779	NA	NA	NA	NA	NA	0	NA	NA	NA	NA	NA	NA	NA	NA	NA	NA	NA	NA	NA	NA	NA	NA	NA	NA	NA	NA	NA	NA	NA	NA	NA	NA	NA	NA	NA
Hsd17b10	chrX:148436439-148438985	0.173818	0	0.022854	0.0624243	0.064774	0	0.178737	0	0.124635	0.101124	0.0299419	0	0.0359053	0.0243902	0.0200985	0.257598	0.164568	0.151587	0.389885	0.189316	0.230591	0.554544	0.478021	0.358312	0.463625	No	No	Yes	Yes	No	Yes	Yes	Yes	Yes	No
Htatsf1	chrX:54306792-54320360	0.0871543	0	0.00129199	0.0592209	0.0369168	0	0.175048	0	0	0.0583495	0.0788277	0	0.0382807	0.106035	0.0481054	0.585588	0.37538	0.398994	0.2907	0	0.330132	0.491554	0.308851	0.483756	0.428054	No	No	Yes	Yes	No	Yes	Yes	Yes	Yes	No
Huwe1	chrX:148237825-148369960	0.222222	NA	0.672222	0.280842	0.391762	0	0.2	0	0	0.0666667	0.341346	NA	0.338889	0.3625	0.350694	0.622222	0.375	0.524064	0.553867	0.784058	0.571842	0.551724	0.625593	0.290476	0.489264	No	No	Yes	No	Yes	Yes	Yes	Yes	Yes	No
Idh3g	chrX:71024302-71032236	0.286071	0	0.200537	0.209009	0.173904	0.00371817	0.308554	0.000489237	0.432935	0.247326	0.269887	0.00231326	0.238384	0.189089	0.143262	0.387949	0.370118	0.44899	0.358778	0.231054	0.359378	0.510755	0.373438	0.4789	0.454364	No	No	Yes	Yes	No	Yes	Yes	Yes	Yes	No
Ids	chrX:67596244-67618260	NA	NA	0	0	0	0	NA	NA	NA	NA	0	NA	0	0	0	NA	0	NA	0.470696	0	0.156899	NA	NA	0.4	0.4	NA	NA	Yes	Yes	NA	NA	NA	NA	NA	No
Ikbkg	chrX:137491456-137529979	NA	0	0.556408	0.142857	0.233089	0	0.207407	0	NA	0.103704	0.0695402	0	0.263542	0.219223	0.160922	0.437214	0.327312	0.593484	0.715841	0.29627	0.474024	0.491994	0.539612	0.947368	0.659658	No	No	Yes	Yes	No	Yes	Yes	Yes	Yes	Yes
Il13ra1	chrX:33652134-33711257	NA	0	0	0	0	0	NA	NA	NA	NA	0	NA	0	NA	0	NA	NA	NA	0	NA	0	0.138095	NA	NA	0.138095	NA	NA	No	Yes	NA	NA	NA	NA	NA	No
Il2rg	chrX:98459726-98463545	0	0	0.00320513	0.00173611	0.00123531	0	0	0	0	0	0	0.00347222	0.00546448	0	0.0029789	0	0.0629322	0.00252525	0	0.0287325	0.018838	0.427869	0.0817251	0.434639	0.314744	No	No	No	Yes	No	No	Yes	No	Yes	Yes
Iqsec2	chrX:148578811-148659779	NA	NA	NA	NA	NA	NA	NA	NA	NA	NA	NA	NA	NA	NA	NA	NA	0	NA	NA	NA	0	NA	NA	NA	NA	NA	NA	NA	NA	NA	NA	NA	NA	NA	NA
Irak1	chrX:71259253-71269260	0	0	0	0.109867	0.0274668	0	0.153306	0.0019305	0	0.0517456	0.0286209	0	0.0383371	0.0201283	0.0194884	0.383281	0.157539	0.168022	0.0924945	0.178918	0.196051	0.526128	0.36147	0.46628	0.451292	No	No	Yes	Yes	No	Yes	Yes	Yes	Yes	No
Itih5l-ps	chrX:147261460-147291950	NA	NA	NA	NA	NA	NA	NA	NA	NA	NA	NA	NA	NA	NA	NA	NA	0	NA	NA	NA	0	NA	NA	NA	NA	NA	NA	NA	NA	NA	NA	NA	NA	NA	NA
Itm2a	chrX:104592534-104598699	0	0	0	0	0	NA	0.0487805	0	0	0.0162602	0	NA	0	0	0	0	NA	NA	NA	0	0	0.454545	0.0833333	NA	0.268939	No	No	No	Yes	No	No	Yes	No	Yes	NA
Kcnd1	chrX:7400969-7413629	NA	NA	NA	NA	NA	NA	NA	NA	NA	NA	NA	NA	NA	NA	NA	NA	0.581983	NA	NA	NA	0.581983	NA	NA	NA	NA	NA	NA	NA	NA	NA	NA	NA	NA	NA	NA
Kctd12b	chrX:150119697-150130823	NA	NA	NA	NA	NA	NA	NA	NA	0	0	NA	NA	NA	NA	NA	NA	NA	NA	NA	NA	NA	NA	NA	NA	NA	NA	NA	NA	NA	Yes	NA	NA	NA	NA	NA
Kdm5c	chrX:148667773-148708897	0	NA	1	0.219513	0.406504	0	0.0625	0	0	0.0208333	0.2753	0	0.242491	0.308179	0.183557	0.416667	0.666667	0.3125	0.629464	0.442708	0.493601	NA	0.541721	NA	0.541721	No	No	No	Yes	Yes	Yes	Yes	Yes	Yes	NA
Kdm6a	chrX:17739793-17856484	0.0992136	0	0.509766	0.272899	0.22047	NA	0.5	0.00833333	0.547913	0.352082	0.204895	0	0.324996	0.286107	0.203701	0.185181	0.15	0.148039	0.261364	0.294163	0.207749	0.415553	0.491244	0.406605	0.437801	Yes	No	No	Yes	No	No	No	No	Yes	Yes
Kif4	chrX:97821404-97922610	0.503623	0	0.00559087	0.234459	0.185918	NA	0.0583794	0	0	0.0194598	0.450598	0	0.178108	0.238074	0.138727	0.84184	0.326162	0.605353	0.74588	0.393844	0.582616	0.75069	0.61188	0.510912	0.624494	No	No	Yes	Yes	Yes	Yes	Yes	Yes	Yes	No
Klf8	chrX:149672588-149830677	0.921569	NA	0	0	0.30719	NA	0	NA	0	0	0	NA	NA	0	0	NA	NA	NA	NA	0.4	0.4	NA	0.302969	NA	0.302969	No	No	No	No	No	Yes	Yes	Yes	Yes	No
Klhl13	chrX:22796397-22942179	NA	NA	NA	NA	NA	NA	NA	NA	NA	NA	NA	NA	NA	NA	NA	NA	0	NA	NA	NA	0	NA	NA	NA	NA	NA	NA	NA	NA	NA	NA	NA	NA	NA	NA
Klhl15	chrX:91480269-91518854	NA	0.03125	0	0.0235849	0.0182783	NA	0.0973114	0	0	0.0324371	0	0	0	0.0525253	0.0175084	0.4375	0.1	0.695046	0.916667	0	0.429843	0.5	0.524799	NA	0.5124	No	No	Yes	Yes	No	Yes	Yes	Yes	Yes	No
Klhl4	chrX:111588129-111674307	NA	NA	NA	NA	NA	0	NA	NA	NA	NA	NA	NA	NA	NA	NA	NA	NA	NA	NA	NA	NA	NA	NA	NA	NA	NA	NA	NA	NA	NA	NA	NA	NA	NA	NA
L1cam	chrX:71099119-71126173	0	NA	0	NA	0	NA	NA	0	NA	0	NA	NA	NA	NA	NA	NA	NA	NA	NA	NA	NA	0.482434	NA	0.450532	0.466483	No	NA	NA	Yes	Yes	NA	NA	NA	NA	No
Lage3	chrX:71597501-71598957	0.241955	0.000413052	0.179498	0.18658	0.152111	0.000954198	0.287907	0.00120044	0.30974	0.199616	0.236067	0.00115942	0.161802	0.108802	0.0905879	0.459824	0.49034	0.371786	0.453483	0.513872	0.457861	0.469194	0.371811	0.475695	0.4389	No	No	Yes	Yes	No	Yes	Yes	Yes	Yes	No
Lamp2	chrX:35758241-35809632	0	0	0.0166667	0.063292	0.0199897	0	0.0262605	0	0.016761	0.0143405	0.0483349	0	0.0475074	0.0298228	0.0257767	0.256673	0.264819	0.0821477	0.0124434	0.185994	0.160415	0.44655	0.144819	0.394545	0.328638	No	No	Yes	Yes	No	Yes	Yes	Yes	Yes	Yes
Lancl3	chrX:8777099-8845211	NA	NA	NA	NA	NA	NA	NA	NA	NA	NA	NA	NA	NA	NA	NA	NA	NA	NA	NA	NA	NA	NA	NA	0.5	0.5	NA	NA	NA	NA	NA	NA	NA	NA	NA	No
Las1l	chrX:93130652-93152298	0.206522	0	0.150568	0.0825037	0.109898	0.00520833	0.169658	0	0	0.0565526	0.144329	0	0	0.0660511	0.022017	0.555357	0.23319	0.314083	0.408649	0.519048	0.406065	0.451344	0.449159	0.575549	0.492018	No	No	Yes	Yes	No	Yes	Yes	Yes	Yes	No
Ldoc1	chrX:58962791-58964125	0.36016	0	0	0	0.09004	NA	0	0	0	0	0	0	0.0159868	0.0246338	0.0135402	0	0.188785	0.337069	0	0	0.105171	0.347965	0.305541	0.240253	0.29792	No	No	No	Yes	No	Yes	Yes	No	Yes	Yes
LOC100046796	chrX:100046796	0	0	0.0147306	0	0.00368264	0	0.0147059	0	0	0.00490196	0.0220401	0.00735294	NA	0	0.00367647	0.0211161	0	0	0.0543478	0.0357143	0.0222357	0.0227273	0.0416667	0.0114943	0.0252961	No	No	No	No	No	No	No	No	No	No
LOC100502723	chrX:100502723	NA	NA	NA	NA	NA	NA	NA	NA	NA	NA	NA	NA	NA	NA	NA	NA	NA	NA	0	NA	0	NA	NA	NA	NA	NA	NA	NA	NA	NA	NA	NA	NA	NA	NA
LOC100503034	chrX:100503034	NA	NA	NA	0	0	NA	NA	NA	NA	NA	NA	NA	NA	NA	NA	NA	NA	NA	NA	0	0	NA	NA	NA	NA	Yes	NA	No	NA	NA	NA	NA	NA	NA	NA
LOC100503043	chrX:100503043	NA	NA	NA	NA	NA	NA	NA	NA	NA	NA	0	NA	NA	NA	NA	NA	NA	NA	NA	NA	NA	NA	NA	NA	NA	NA	NA	NA	NA	NA	NA	NA	NA	NA	NA
LOC100503280	chrX:100503280	0	NA	NA	NA	0	NA	0	NA	NA	0	NA	NA	NA	NA	NA	NA	NA	NA	NA	NA	NA	NA	NA	NA	NA	No	NA	Yes	NA	Yes	NA	NA	NA	NA	NA
LOC100503383	chrX:100503383	NA	NA	NA	NA	NA	0	NA	0	NA	0	0	NA	NA	NA	NA	NA	NA	NA	NA	0	0	NA	NA	NA	NA	NA	NA	NA	NA	Yes	No	Yes	NA	NA	NA
LOC100503426	chrX:100503426	NA	0	0.632576	0.210723	0.281099	NA	0.203525	0	0	0.0678416	0.138574	0	0.238194	0.277751	0.171982	0.383469	0	0.444771	0.363319	0.362187	0.310749	0.8	0.223123	0.297397	0.440173	No	No	No	Yes	Yes	Yes	Yes	Yes	Yes	No
LOC100503437	chrX:100503437	NA	0	NA	NA	0	NA	NA	NA	NA	NA	0	NA	NA	NA	NA	NA	NA	NA	NA	NA	NA	0.5	NA	0.466667	0.483333	NA	NA	NA	Yes	NA	NA	NA	NA	NA	No
LOC100503459	chrX:100503459	1	1	0.994253	0.997199	0.997863	1	0.995851	1	0.998551	0.998134	1	1	1	0.994805	0.998268	1	1	1	0.994565	1	0.998913	0.997487	0.997214	0.997063	0.997255	No	No	No	No	No	No	No	No	No	No
LOC100503525	chrX:100503525	NA	NA	NA	NA	NA	NA	NA	NA	0	0	NA	NA	NA	NA	NA	NA	NA	NA	NA	NA	NA	NA	NA	NA	NA	NA	NA	NA	NA	NA	NA	NA	NA	NA	NA
LOC100503548	chrX:100503548	0	0	0	0	0	0	0	0	0	0	0	0	0.00675676	0	0.00225225	0	0.0822285	0	0	0.049359	0.0263175	0.195833	0.148387	0.269318	0.204513	No	No	No	Yes	No	No	Yes	No	Yes	No
LOC100503934	chrX:100503934	0.484174	0	0.346939	0.354058	0.296293	0.0697674	0.387328	0.00167785	0.41614	0.268382	0.314486	0.00164339	0.280353	0.292716	0.191571	0.540822	0.458266	0.525827	0.495783	0.517904	0.50772	0.624878	0.458569	0.567598	0.550348	No	No	Yes	Yes	No	Yes	Yes	Yes	Yes	No
LOC100503948	chrX:100503948	0.000712251	0	0.134834	0.126627	0.0655433	NA	0.327892	0	0	0.109297	0.390407	0	0	0.120606	0.040202	1	0.329563	0.446605	0.93869	0.201213	0.583214	0.42598	0.530323	0.662542	0.539615	No	No	Yes	Yes	No	Yes	Yes	Yes	Yes	No
LOC100504335	chrX:100504335	0.324238	0	0.105041	0.202112	0.157848	0	0.312181	0	0.216516	0.176232	0.130167	0	0.211518	0.130546	0.114021	0.228394	0.308413	0.401344	0.433092	0.304226	0.335094	0.5083	0.182644	0.534424	0.408456	No	No	Yes	Yes	No	Yes	Yes	Yes	Yes	No
LOC100504463	chrX:100504463	0.501916	0.015625	0.0994661	0.284103	0.225277	NA	0.109217	0.1	0.584924	0.264714	0.098659	0.0192308	0.120942	0.0638889	0.0680204	0	NA	0.2	0.300758	0	0.125189	0.553846	0.206044	0.406818	0.388903	No	No	No	Yes	No	No	Yes	No	Yes	No
LOC100504630	chrX:100504630	1	NA	NA	NA	1	NA	NA	NA	NA	NA	NA	NA	NA	NA	NA	NA	NA	NA	NA	NA	NA	0.942857	1	1	0.980952	NA	NA	NA	No	NA	NA	NA	NA	NA	No
LOC100504671	chrX:100504671	NA	NA	0	NA	0	NA	NA	NA	0	0	NA	NA	NA	NA	NA	NA	NA	NA	NA	NA	NA	NA	NA	NA	NA	No	NA	NA	NA	NA	NA	NA	NA	NA	NA
LOC100504708	chrX:100504708	0.782003	NA	0	0.541667	0.441223	NA	0.4	0	0	0.133333	NA	NA	NA	0.166667	0.166667	NA	NA	NA	NA	NA	NA	0.842105	0.463158	0.702797	0.669353	No	NA	NA	Yes	No	NA	NA	NA	NA	No
Lonrf3	chrX:33868404-33906851	NA	0	NA	0.479167	0.239583	0	NA	0	0	0	0	NA	0	NA	0	NA	NA	NA	NA	NA	NA	NA	NA	NA	NA	No	NA	NA	NA	No	NA	NA	NA	NA	NA
Lrch2	chrX:143906237-143988624	NA	NA	NA	NA	NA	NA	NA	NA	NA	NA	NA	NA	NA	NA	NA	NA	NA	NA	NA	NA	NA	NA	NA	0.333333	0.333333	NA	NA	NA	NA	NA	NA	NA	NA	NA	No
Magea1	chrX:151523062-151524333	NA	NA	NA	1	1	NA	NA	NA	NA	NA	1	NA	NA	NA	NA	NA	NA	NA	NA	1	1	NA	NA	NA	NA	NA	NA	No	NA	NA	NA	NA	NA	NA	NA
Magea3	chrX:151383006-151384112	NA	NA	NA	1	1	NA	NA	NA	NA	NA	0.236364	NA	NA	NA	NA	NA	NA	NA	NA	NA	NA	NA	NA	1	1	NA	NA	NA	No	NA	NA	NA	NA	NA	No
Magea5	chrX:151487604-151496096	NA	0	NA	0	0	NA	0.25	NA	NA	0.25	0.00170068	0	0	0	0	0	NA	NA	NA	NA	0	0.708833	NA	0.947262	0.828048	Yes	No	No	Yes	No	No	Yes	No	Yes	No
Magea6	chrX:151358555-151360658	NA	NA	NA	NA	NA	NA	NA	NA	NA	NA	0.153846	NA	NA	NA	NA	NA	NA	NA	NA	NA	NA	0.2	NA	NA	0.2	NA	NA	NA	NA	NA	NA	NA	NA	NA	No
Magea8	chrX:151420318-151430393	NA	0	NA	0.015873	0.00793651	NA	NA	NA	NA	NA	0	NA	NA	NA	NA	NA	NA	NA	NA	NA	NA	NA	NA	NA	NA	NA	NA	NA	Yes	NA	NA	NA	NA	NA	NA
Mageb16	chrX:76868570-76916774	NA	0	0.142857	0.0909091	0.0779221	NA	0.296296	0	0	0.0987654	0.105263	0	0.0512821	0.285714	0.112332	1	0.432432	0.782609	0.709677	0.590909	0.703126	0.416667	0.478261	0.4	0.431643	No	No	Yes	Yes	No	Yes	Yes	Yes	Yes	No
Mageb16-ps1	chrX:140987301-140990782	NA	0.333333	0.333333	1	0.555556	NA	0.5	0.485714	1	0.661905	1	0.5	0.5	0.5	0.5	1	1	1	1	1	1	0.5	0.978723	0.5	0.659574	Yes	No	Yes	Yes	No	Yes	No	Yes	Yes	No
Maged1	chrX:91780813-91787413	0	0.000921659	0.909091	0.0308939	0.235227	0	0.00512821	0	0.00101523	0.00204781	0.147691	0	0.00163934	0.00872727	0.00345554	0	0.137945	0	0.460276	0.165246	0.152693	0.46144	0.149159	0.530266	0.380288	No	No	No	Yes	No	Yes	Yes	Yes	Yes	Yes
Maged2	chrX:147240964-147248825	0	0	NA	NA	0	0	0.0666667	0	0	0.0222222	0	0	0	0	0	0	0.0416667	NA	NA	0	0.0138889	0.514286	0	0.459677	0.324654	No	No	No	Yes	No	No	Yes	No	Yes	No
Magee1	chrX:102315735-102319250	NA	NA	NA	NA	NA	0	NA	NA	NA	NA	0	NA	NA	NA	NA	NA	NA	NA	NA	NA	NA	NA	NA	NA	NA	NA	NA	NA	NA	NA	NA	NA	NA	NA	NA
Magix	chrX:7250292-7258215	NA	0	NA	NA	0	0	NA	0.0384615	NA	0.0384615	0	NA	NA	NA	NA	NA	NA	NA	NA	NA	NA	NA	NA	NA	NA	No	NA	NA	NA	NA	NA	NA	NA	NA	NA
Magt1	chrX:103163423-103207238	0	0	0	0.0344465	0.00861163	0	0.0558877	0	0	0.0186292	0.0293464	0	0.00571429	0.00642129	0.00404519	0.105805	0.0453497	0.156141	0.0997215	0.0532283	0.0920491	0.413468	0.0915064	0.416336	0.307103	No	No	No	Yes	No	No	Yes	No	Yes	Yes
Maoa	chrX:16196824-16264938	0	0	0	0.257195	0.0642988	0	0.109441	0	0.0131579	0.0408662	0.00666667	0	0	0.0882382	0.0294127	NA	0	0.4	0	0.0875422	0.121886	0.0614494	0.486147	0.163844	0.237147	No	No	No	Yes	No	No	Yes	No	Yes	No
Maob	chrX:16286407-16394492	0	0.00416667	NA	NA	0.00208333	0	0	NA	NA	0	0	NA	0	0	0	0	NA	0	0	NA	0	NA	0.00694444	0.35927	0.183107	No	No	No	Yes	No	No	Yes	No	Yes	No
Map3k15	chrX:156426365-156561283	0.515103	0.00115607	0.325204	0.216189	0.264413	0	0.263869	0	0.597266	0.287045	0.279944	0.00200803	0.301064	0.372264	0.225112	0.731238	0.441233	0.605969	0.685606	0.137892	0.520387	0.507044	0.534883	0.550284	0.530737	No	No	Yes	Yes	No	Yes	Yes	Yes	Yes	No
Mbnl3	chrX:102992954-103124711	0	0	0	0	0	NA	0.0541667	0.0016129	0	0.0185932	0	0	0.0417112	0	0.0139037	0.598771	NA	NA	NA	NA	0.598771	0.50726	0.408696	0.514815	0.476924	No	No	Yes	Yes	No	Yes	Yes	Yes	Yes	No
Mbtps2	chrX:153985754-154036647	0	NA	0.394737	0	0.131579	NA	NA	NA	NA	NA	0.597828	NA	0.0909091	NA	0.0909091	NA	0.4	NA	NA	0.979167	0.689583	0.449925	NA	0.9	0.674962	NA	NA	Yes	Yes	NA	NA	NA	NA	NA	No
Mcart6	chrX:126284278-126995733	0	NA	0.707386	NA	0.353693	NA	0.5	NA	NA	0.5	NA	NA	0	NA	0	NA	0.17586	NA	0.239316	0	0.138392	0.517857	NA	NA	0.517857	Yes	No	No	Yes	No	No	No	Yes	Yes	No
Mcf2	chrX:57309133-57400820	0.144928	0	NA	NA	0.0724638	NA	NA	NA	NA	NA	NA	0	NA	0.290909	0.145455	NA	NA	NA	NA	NA	NA	NA	NA	0.364099	0.364099	NA	NA	NA	Yes	NA	NA	NA	NA	NA	No
Mcts1	chrX:35953835-35966699	0.120192	0	0.047619	0.312195	0.120002	0	0.35122	0	0	0.117073	0.192308	0	0.136364	0.254098	0.130154	0.346774	0.257812	0.217054	0.245033	0.331858	0.279706	0.393443	0.3	0.44385	0.379098	No	No	Yes	Yes	No	Yes	Yes	Yes	Yes	No
Mecp2	chrX:71272161-71330975	0	0	NA	0	0	0	0.0781663	0	0	0.0260554	0.120103	0	NA	0.0835664	0.0417832	0.742821	0.324103	0.836178	1	0.563021	0.693225	0.402427	0.463194	0.576771	0.480797	No	No	Yes	Yes	No	Yes	Yes	Yes	Yes	No
Med12	chrX:98469430-98494273	NA	NA	0	NA	0	NA	NA	NA	NA	NA	NA	NA	NA	NA	NA	NA	0.818182	NA	NA	0	0.409091	NA	0.416667	NA	0.416667	NA	NA	Yes	Yes	NA	NA	NA	NA	NA	No
Med14	chrX:106199876-106208719	NA	0	0.707751	0.272924	0.326892	NA	0.420566	NA	1	0.710283	0.150265	0	0.214087	0.358683	0.190923	0.0954545	0.585683	0.451936	0.307972	0.299942	0.348198	0.433374	0.427287	0.373578	0.411413	Yes	No	No	No	No	No	No	Yes	Yes	No
Mid1	chrX:166123179-166428729	NA	1	NA	NA	1	NA	NA	NA	NA	NA	NA	NA	NA	NA	NA	NA	0	0	0	NA	0	NA	NA	NA	NA	NA	NA	No	NA	NA	NA	NA	NA	NA	NA
Mid1ip1	chrX:10294491-10296828	0.207748	0	0	0.00925926	0.0542517	0	0.264542	0	0	0.0881806	0.0847018	0	0	0	0	0	0.0425725	0.104538	0	0	0.029422	0.213346	0.104409	0.493641	0.270465	No	No	No	Yes	No	No	Yes	No	Yes	Yes
Mmgt1	chrX:53838689-53851096	0.221154	0	1	0.19597	0.354281	NA	0.206294	NA	0	0.103147	0	NA	0.0825792	0.449472	0.266026	0	0.322222	0.3	0.25	0.300981	0.234641	0.469231	0.32275	0.551535	0.447839	No	No	No	No	Yes	Yes	Yes	No	Yes	Yes
Morc4	chrX:136356174-136406193	0	NA	NA	NA	0	NA	NA	NA	NA	NA	NA	NA	NA	0	0	NA	NA	NA	NA	NA	NA	0.584335	NA	0.437058	0.510697	NA	NA	NA	Yes	NA	NA	NA	NA	NA	No
Morf4l2	chrX:133267481-133278225	0.164208	0.00128866	0	0.104576	0.0675181	0	0.151104	0.00134048	0.0012285	0.0512243	0.362685	0.00274725	0.0647861	0.0741808	0.0472381	0.314997	0.189741	0.438121	0.416695	0.277221	0.327355	0.490713	0.426398	0.517572	0.478228	No	No	Yes	Yes	No	Yes	Yes	Yes	Yes	Yes
Mospd1	chrX:50698198-50723669	NA	0	0.00243309	0.00106157	0.00116489	0	0.101708	0	0.00617284	0.0359604	0.112816	0.00117371	0.0204837	0.0530299	0.0248958	0.354419	0.155065	0.322578	0.54147	0.298773	0.334461	0.446502	0.267289	0.508841	0.407544	No	No	Yes	Yes	No	Yes	Yes	Yes	Yes	No
Mospd2	chrX:135868222-135872704	NA	NA	NA	0.243873	0.243873	NA	0.0952381	0.1	NA	0.097619	0.0714286	0.25	0	NA	0.125	0	0	1	0.425635	0	0.285127	NA	0.377778	NA	0.377778	No	No	No	Yes	No	Yes	Yes	Yes	Yes	NA
Mpp1	chrX:72355072-72376288	0	0	0.275021	0.205272	0.120073	0	0.256187	0	0.25167	0.169286	0.219123	0	0.168313	0.283718	0.150677	0.457936	0.311809	0.420115	0.339228	0.417803	0.389378	0.415142	0.39173	0.38865	0.398507	No	No	Yes	Yes	No	Yes	Yes	Yes	Yes	No
Msl3	chrX:165092049-165111834	NA	0	0.109376	0.242212	0.117196	0	0.424753	0.00409836	NA	0.214426	0.19772	0	0.284024	0.185697	0.156574	0.80869	0.41202	0.475744	0.350674	0.472773	0.50398	0.373069	0.470548	0.478078	0.440565	No	No	Yes	Yes	No	Yes	Yes	Yes	Yes	No
Msn	chrX:93291384-93363892	0	0	0	0	0	0	0	0	0	0	0.00958272	0	0.0165042	0.000757527	0.0057539	0	0	0.0400038	0	0.0325294	0.0145066	0.385298	0.137913	0.267312	0.263508	No	No	No	Yes	No	No	Yes	No	Yes	Yes
Mtap7d2	chrX:155852510-155936879	0	NA	NA	NA	0	0	0.0434783	NA	NA	0.0434783	1	NA	NA	NA	NA	NA	0.0952381	NA	NA	0.0357143	0.0654762	NA	NA	NA	NA	No	NA	No	NA	NA	No	Yes	NA	NA	NA
Mtap7d3	chrX:54051130-54075502	NA	NA	NA	NA	NA	NA	NA	NA	NA	NA	NA	NA	NA	NA	NA	0	NA	NA	NA	NA	0	NA	NA	NA	NA	NA	NA	NA	NA	NA	NA	NA	NA	NA	NA
Mtcp1	chrX:72655781-72661882	NA	0	NA	NA	0	0	0	NA	NA	0	0.2	NA	NA	NA	NA	0.1875	NA	0.181818	0.4375	NA	0.268939	NA	NA	NA	NA	No	NA	Yes	NA	NA	Yes	Yes	NA	NA	NA
Mtm1	chrX:68463942-68568470	NA	0	0	0.0705403	0.0235134	NA	0.19383	0	0.00160256	0.0651441	0.108394	0	0	0.13387	0.0446234	0	0.294056	0.316667	0.229617	0	0.168068	0.1	0.433202	0.230077	0.254426	No	No	Yes	Yes	No	Yes	Yes	Yes	Yes	No
Mtmr1	chrX:68617935-68672371	0	0	0	0.135163	0.0337909	0	0	0	0	0	0	0	0.0371834	0.0104072	0.0158635	NA	NA	0	0	0	0	0.138715	0.328424	NA	0.233569	No	No	No	Yes	No	No	Yes	No	Yes	No
Mum1l1	chrX:135744583-135772874	NA	0	NA	NA	0	NA	NA	NA	NA	NA	NA	NA	0	NA	0	NA	NA	NA	NA	NA	NA	NA	NA	NA	NA	NA	NA	NA	NA	NA	NA	NA	NA	NA	NA
Naa10	chrX:71162209-71167283	0.349301	0	0.328704	0.197802	0.218952	0	0.331429	0	0.337248	0.222892	0.277612	0.031746	0.171598	0.240602	0.147982	0.494186	0.398907	0.294393	0.575581	0.300971	0.412808	0.489286	0.395238	0.521236	0.468586	No	No	Yes	Yes	No	Yes	Yes	Yes	Yes	No
Nap1l3	chrX:119508170-119510994	NA	NA	NA	NA	NA	NA	NA	NA	0	0	0	NA	NA	NA	NA	NA	NA	NA	NA	NA	NA	NA	NA	NA	NA	NA	NA	NA	NA	NA	NA	NA	NA	NA	NA
Ncrna00086	chrX:53627763-53631647	NA	NA	NA	NA	NA	NA	0.8	NA	NA	0.8	1	NA	NA	NA	NA	NA	NA	NA	NA	NA	NA	NA	NA	0.41552	0.41552	NA	NA	NA	NA	NA	NA	NA	NA	NA	No
Ndp	chrX:16462648-16488890	NA	0	NA	NA	0	0	NA	NA	0	0	0.00793651	NA	0	0	0	NA	NA	NA	NA	NA	NA	NA	0	NA	0	No	NA	NA	No	No	NA	NA	NA	NA	No
Ndufa1	chrX:34727583-34731233	0.294499	0	0.273279	0.235725	0.200876	0.00197239	0.311489	0.0145865	0.219181	0.181752	0.210729	0.00137741	0.213659	0.302793	0.17261	0.303854	0.34979	0.345117	0.420458	0.438334	0.371511	0.412204	0.359046	0.435198	0.402149	No	No	Yes	Yes	No	Yes	Yes	Yes	Yes	No
Ndufb11	chrX:20192452-20194690	0.132688	0.0450483	0.184859	0.184761	0.136839	0	0.222707	0.0505433	0.250907	0.174719	0.191787	0.0207693	0.207141	0.166189	0.131366	0.289504	0.223481	0.274324	0.242498	0.198563	0.245674	0.453798	0.252319	0.465085	0.3904	No	No	Yes	Yes	No	No	Yes	Yes	Yes	Yes
Ngfrap1	chrX:132804792-132806517	0.179956	0.00212766	0.160375	0.0331624	0.0939053	0	0.38554	0.0386401	0.163978	0.196053	0.116854	0	0.0319128	0.422239	0.151384	0.43221	0.107421	0.20252	0.296327	0.28799	0.265294	0.358708	0.424513	0.298151	0.360457	Yes	No	Yes	Yes	No	No	Yes	Yes	Yes	No
Nhsl2	chrX:99044724-99287394	NA	NA	NA	NA	NA	NA	NA	NA	NA	NA	NA	NA	NA	NA	NA	0	0	NA	NA	NA	0	NA	NA	NA	NA	NA	NA	NA	NA	NA	NA	NA	NA	NA	NA
Nkap	chrX:34666758-34690741	0.43589	0.00980392	0.436265	0.601552	0.370877	0.0185185	0.327474	0	0.637263	0.321579	0.325325	0	0.300273	0.198436	0.166236	0.682146	0.372352	0.671256	0.344822	0.648911	0.543897	0.474861	0.301127	0.457297	0.411095	No	No	Yes	No	No	Yes	No	Yes	Yes	No
Nkrf	chrX:34427537-34442894	0	0	NA	NA	0	NA	NA	NA	NA	NA	NA	NA	NA	NA	NA	NA	NA	NA	NA	NA	NA	NA	NA	NA	NA	NA	NA	NA	NA	NA	NA	NA	NA	NA	NA
Nono	chrX:98624990-98643932	0.0186074	0	0.00719619	0.0123719	0.00954386	0	0.0197178	0.000823766	0.0257475	0.0154297	0.0122459	0.000416667	0.00369241	0.00620298	0.00343735	0.051992	0.0165194	0.0301501	0.0346617	0.0402958	0.0347238	0.0484049	0.0433796	0.0475708	0.0464518	No	No	No	No	No	No	No	No	No	No
Nr0b1	chrX:83437114-83441283	0.0015873	NA	NA	0	0.000793651	NA	0	0.00526316	NA	0.00263158	0	NA	NA	NA	NA	0	NA	0.1	NA	NA	0.05	0.595496	0.338497	0.55554	0.496511	No	NA	No	Yes	NA	No	Yes	NA	NA	No
Nsdhl	chrX:160414754-160465942	0.0227273	0	0	0.0392725	0.0154999	NA	0.0666423	0	0	0.0222141	0.03813	0	0.0210853	0	0.00702842	0	0.0682957	NA	0	0	0.0170739	0.453581	0.0434174	0.3142	0.2704	No	No	No	Yes	No	No	Yes	No	Yes	No
Nudt11	chrX:5624625-5631869	0	NA	NA	0	0	0	0.142857	NA	NA	0.142857	NA	NA	NA	NA	NA	NA	NA	NA	NA	0.384615	0.384615	0	NA	0.0909091	0.0454545	Yes	NA	Yes	No	NA	Yes	No	NA	NA	No
Nup62cl	chrX:136542212-136597107	0	0	0	0	0	NA	0.0294118	0	0.166667	0.0653595	0	0	0	0	0	NA	0	NA	NA	NA	0	0.530599	0.278711	0.351068	0.386793	No	No	No	Yes	No	No	Yes	No	Yes	No
Nxt2	chrX:35180232-35183034	0.040893	0.05	NA	0.0213294	0.0374075	0.0365059	NA	0.06	0.031746	0.045873	0.0192308	0	0.0888636	0.034632	0.0411652	0.155556	NA	0.325455	0.0416667	0.338008	0.215171	0.309091	0.139468	0.334945	0.261168	No	No	Yes	Yes	No	Yes	Yes	Yes	Yes	No
Ocrl	chrX:45265633-45319045	0.825225	0	0.00892857	0.0463012	0.220114	NA	0	0	0	0	0.0441919	0	0.0659753	0.0141009	0.0266921	0.04	0.2	NA	NA	0.245082	0.161694	0.5	0.216652	0.692308	0.469653	No	No	No	Yes	No	Yes	Yes	Yes	Yes	No
Ofd1	chrX:162827965-162878636	0	0	0.572811	0.0851511	0.16449	0	0.414495	0	0.465278	0.293258	0	0	0.0866013	0.235992	0.107531	0.853846	0.428765	0.236255	0.599265	0.274162	0.478459	0.625385	0.527025	0.521697	0.558036	Yes	No	Yes	Yes	No	Yes	Yes	Yes	Yes	No
Ogt	chrX:98835403-98879690	0.746753	0	0.439323	0.353146	0.384805	NA	0.34896	0	NA	0.17448	0.396962	0	0.229097	0.263522	0.164207	0.405632	0.42153	0.377429	0.731725	0.18296	0.423855	0.631939	0.377504	0.548164	0.519202	No	No	No	Yes	No	Yes	Yes	Yes	Yes	No
Ophn1	chrX:95,752,854-96,086,324	NA	NA	NA	NA	NA	NA	NA	NA	NA	NA	0	NA	NA	NA	NA	NA	NA	NA	NA	NA	NA	NA	NA	NA	NA	NA	NA	NA	NA	NA	NA	NA	NA	NA	NA
Otud5	chrX:7496948-7501536	0.555556	0	0.277647	0.411811	0.311253	0	0.392788	0	0	0.130929	0.237824	0.00308642	0.262697	0.304103	0.189962	0.403108	0.272091	0.491836	0.284358	0.380246	0.366328	0.573486	0.534789	0.621941	0.576739	No	No	No	Yes	No	Yes	Yes	Yes	Yes	Yes
Pcdh19	chrX:130117400-130223532	0.285714	0	NA	0.145833	0.143849	NA	NA	NA	1	1	0.5	NA	NA	NA	NA	NA	NA	NA	NA	NA	NA	0.294118	NA	NA	0.294118	Yes	NA	NA	Yes	NA	NA	NA	NA	NA	NA
Pcsk1n	chrX:7496948-7501536	0.337655	NA	0	NA	0.168827	NA	0.0138889	NA	0.283019	0.148454	NA	NA	NA	NA	NA	NA	NA	NA	0.636364	NA	0.636364	0.534483	NA	0.296599	0.415541	No	NA	Yes	Yes	NA	Yes	Yes	NA	NA	No
Pcyt1b	chrX:90920451-90995287	0	0.00925926	0	NA	0.00308642	0	0.181818	NA	NA	0.181818	0	NA	NA	NA	NA	NA	NA	NA	NA	NA	NA	NA	NA	NA	NA	Yes	NA	NA	NA	NA	NA	NA	NA	NA	NA
Pdha1	chrX:34148178-34185409	0.268182	0.00159824	0.297869	0.372735	0.235096	0.00773036	0.281709	0.000581395	0.41787	0.233387	0.319083	0.000426621	0.280864	0.374551	0.218614	0.698557	0.458738	0.619404	0.607362	0.413023	0.559417	0.499989	0.521715	0.506798	0.509501	No	No	Yes	Yes	No	Yes	Yes	Yes	Yes	No
Pdk3	chrX:91009955-91077434	0.192059	0.00173611	NA	0	0.0645984	0	0.102558	0	0	0.0341859	0	0	0	0.00709541	0.00236514	NA	0	0	0.224803	0	0.0562006	0.525515	0	0.434605	0.32004	No	No	No	Yes	No	No	Yes	No	Yes	No
Pdzd11	chrX:7170935-7182546	0.0909091	0	0.0526316	0	0.0358852	0	0	0	0.155844	0.0519481	0.0987025	0	0.0232558	0.0714286	0.0315615	0.608696	0.296296	0.632653	0.52466	0.247423	0.461946	0.48	0.302326	0.465116	0.415814	No	No	Yes	Yes	No	Yes	Yes	Yes	Yes	No
Pdzd4	chrX:71038696-71070308	0.0163043	NA	NA	NA	0.0163043	NA	NA	NA	NA	NA	NA	NA	NA	NA	NA	NA	NA	NA	NA	NA	NA	NA	NA	NA	NA	NA	NA	NA	NA	NA	NA	NA	NA	NA	NA
Pfkfb1	chrX:147024464-147078403	NA	0	0	0	0	NA	0	0	0	0	0	0	0	0	0	NA	0.357143	NA	NA	0	0.178571	0.591111	NA	0.413725	0.502418	No	No	Yes	Yes	No	Yes	Yes	Yes	Yes	No
Pgk1	chrX:131338681-131343760	0.342466	0	0	0.0224719	0.0912344	0	0	0.0508475	0	0.0169492	0	0	0	0	0	NA	0.192308	0	NA	0	0.0641026	0.806349	0.2	0.40445	0.470266	No	No	No	Yes	No	No	Yes	No	Yes	No
Pgrmc1	chrX:34138220-34146074	0.199802	0	0.00568182	0.0807929	0.0715692	0	0.0774882	0	0.00371747	0.0270685	0.0864431	0.00301205	0.0456417	0.038383	0.0290122	0.414852	0.203567	0.305143	0.236237	0.147484	0.261457	0.399581	0.182325	0.559011	0.380306	No	No	Yes	Yes	No	Yes	Yes	Yes	Yes	No
Phf16	chrX:20037653-20095022	NA	NA	0	0.228962	0.114481	NA	0.161111	0	NA	0.0805556	0.275201	0	0.130196	0.153677	0.0946246	NA	0.411765	NA	NA	0.105598	0.258681	0.133333	0.480827	NA	0.30708	No	No	Yes	Yes	No	Yes	Yes	Yes	Yes	NA
Phf6	chrX:50265443-50310120	0.0720721	0	0	0.088545	0.0401543	NA	0.174499	0	0.0437392	0.0727462	0.192968	0	0	0	0	NA	NA	0.34127	0.376649	0.0704545	0.262791	0.121482	0.202698	NA	0.16209	No	No	Yes	Yes	No	Yes	No	Yes	Yes	NA
Phf8	chrX:147955215-148068400	NA	NA	0	0	0	NA	NA	NA	NA	NA	NA	NA	NA	NA	NA	1	NA	0	0.761905	NA	0.587302	NA	0.25303	NA	0.25303	NA	NA	Yes	Yes	NA	NA	NA	NA	NA	NA
Phka1	chrX:99709314-99839585	0	NA	NA	NA	0	0	NA	NA	NA	NA	NA	NA	NA	NA	NA	NA	NA	NA	NA	NA	NA	NA	NA	NA	NA	NA	NA	NA	Yes	NA	NA	NA	NA	NA	NA
Phka2	chrX:156940098-157036810	NA	NA	0	0.136447	0.0682236	NA	NA	0	NA	0	NA	0	0.166667	0	0.0555556	NA	NA	NA	NA	0.0125	0.0125	NA	NA	NA	NA	No	No	No	Yes	No	No	Yes	No	Yes	NA
Piga	chrX:160857719-160871847	0.75	0	NA	0.562383	0.437461	NA	0.439394	0.5	NA	0.469697	0.440634	NA	0.0192308	0.118119	0.0686748	NA	0.259357	NA	0.515862	0.32029	0.36517	0.457837	0.530323	0.592254	0.526805	No	No	No	No	No	No	No	Yes	Yes	No
Pim2	chrX:7455432-7460558	0.703671	0.125	NA	0.146468	0.325046	0	0	0.2	0.127717	0.109239	0.136364	0.333333	0.0892857	0	0.140873	NA	0.564983	0.401546	0.411248	0	0.344444	0.616504	0.28688	0.683314	0.528899	No	No	No	Yes	No	Yes	Yes	Yes	Yes	No
Pir	chrX:160707363-160810945	NA	NA	0	0	0	NA	0	0	NA	0	NA	0	NA	0	0	NA	0	NA	NA	0.777778	0.388889	NA	NA	NA	NA	No	No	Yes	Yes	No	Yes	Yes	Yes	Yes	NA
Pja1	chrX:96661073-96666074	NA	NA	NA	NA	NA	0	NA	0	NA	0	0	NA	0	0	0	NA	NA	NA	NA	0	0	0.452083	0	0.319425	0.25717	NA	NA	NA	NA	No	No	Yes	No	Yes	No
Plac1	chrX:50423179-50467582	0	0.249627	0.332916	0	0.145636	NA	0	0.333333	0.249726	0.194353	0.166667	0	0.0019305	0	0.000643501	0.535714	0.294466	NA	NA	0	0.276727	0.490087	NA	0.486546	0.488317	No	No	Yes	Yes	No	No	Yes	Yes	Yes	No
Plp1	chrX:133357375-133372281	NA	NA	NA	NA	NA	0.00595238	NA	NA	0	0	NA	NA	NA	NA	NA	NA	NA	NA	NA	NA	NA	NA	NA	0.909091	0.909091	NA	NA	NA	NA	NA	NA	NA	NA	NA	No
Plp2	chrX:7245242-7248404	0.273749	0	0.0557237	0.10285	0.108081	0	0.141778	0.000712251	0.0416804	0.0613902	0.0508705	0	0.111664	0.139791	0.0838184	0.271213	0.11341	0.189356	0.218334	0.165069	0.191476	0.437302	0.273585	0.443419	0.384769	No	No	No	Yes	No	Yes	Yes	Yes	Yes	Yes
Pls3	chrX:73030993-73120509	0.25	0.165533	0.172131	0.186234	0.193475	0.166667	0.258065	0.167558	0.166667	0.19743	0.251907	0.165766	0.174242	0.0285714	0.12286	NA	0	NA	NA	0.290624	0.145312	0.5	0.5	0.5	0.5	No	No	No	Yes	No	No	Yes	No	Yes	No
Plxna3	chrX:71574405-71590028	NA	NA	NA	NA	NA	NA	NA	NA	NA	NA	NA	NA	NA	NA	NA	NA	0	NA	NA	0	0	NA	NA	NA	NA	NA	NA	NA	NA	NA	NA	NA	NA	NA	NA
Plxnb3	chrX:71002399-71017849	NA	NA	NA	NA	NA	0	NA	NA	NA	NA	0	NA	NA	NA	NA	NA	NA	NA	NA	NA	NA	NA	NA	NA	NA	NA	NA	NA	NA	NA	NA	NA	NA	NA	NA
Pnck	chrX:70901331-70905193	0.25	0.5	NA	NA	0.375	NA	NA	0.25	0.276316	0.263158	NA	NA	NA	NA	NA	NA	NA	1	0.411765	NA	0.705882	0.458333	NA	0.5	0.479167	No	NA	Yes	Yes	NA	Yes	Yes	NA	NA	No
Pnma5	chrX:70279327-70282442	0	0	0	0	0	NA	0	0	0	0	0	0	0	0	0	0	0	0	NA	NA	0	0.456818	0.3	0.342246	0.366355	No	No	No	Yes	No	No	Yes	No	Yes	No
Pola1	chrX:90550105-90877494	0.718925	0	0	0.162185	0.220278	NA	0.493974	0	NA	0.246987	0.672463	0	0.0202739	0.0994504	0.0399081	0.673236	0.19903	0.367361	0.516028	0.360004	0.423132	NA	0.466414	NA	0.466414	No	No	Yes	Yes	No	Yes	Yes	Yes	Yes	No
Porcn	chrX:7770976-7783651	0.297696	0	0.197115	NA	0.164937	0	0.431624	0	0.547671	0.326432	0	0	0	NA	0	NA	NA	0.374396	0.372083	0	0.248826	0.52381	0.153846	0.555575	0.411077	Yes	No	No	Yes	No	No	No	Yes	Yes	No
Ppp1r3f	chrX:7135688-7151246	0.2	0	0	NA	0.0666667	NA	NA	NA	NA	NA	NA	NA	NA	NA	NA	NA	NA	NA	NA	NA	NA	NA	NA	NA	NA	NA	NA	NA	NA	NA	NA	NA	NA	NA	NA
Pqbp1	chrX:159198304-159217022	0.342852	0	0.1652	0.283068	0.19778	0	0.295146	0	0.162906	0.152684	0.162671	0.0268707	0.0813477	0.11895	0.0757229	0.328	0.256576	0.375	0.341473	0.128576	0.285925	0.480539	0.274676	0.499283	0.418166	No	No	No	Yes	No	Yes	Yes	Yes	Yes	No
Praf2	chrX:7305697-7308189	0.55814	0	0.137611	0.206667	0.225604	0	0.241441	0	0.161122	0.134188	0.0269608	0	0.0902778	0.0930233	0.0611003	0.436189	0.651914	0.154762	0.362179	0	0.321009	0.452381	0.540132	0.425824	0.472779	No	No	No	Yes	No	Yes	Yes	Yes	Yes	Yes
Pramel3	chrX:131836855-131847175	NA	NA	NA	NA	NA	NA	NA	NA	NA	NA	NA	NA	NA	NA	NA	NA	NA	NA	NA	NA	NA	NA	NA	1	1	NA	NA	NA	NA	NA	NA	NA	NA	NA	No
Prickle3	chrX:7235659-7245312	0	NA	0	0	0	NA	NA	NA	0	0	0	NA	NA	NA	NA	0	NA	0	NA	0	0	0	0	NA	0	No	NA	No	No	NA	No	No	NA	NA	NA
Prkx	chrX:75007362-75041299	1	0	0	0.0133333	0.253333	0	0	0	NA	0	0.306228	0	0.0402442	0.0721812	0.0374751	0	0	0.445731	0.0197458	0.0111111	0.0953176	0.351515	0.164164	NA	0.257839	No	No	No	No	No	No	Yes	No	Yes	NA
Prps1	chrX:156560151-156576268	0.50772	0.00130152	0.125803	0.158263	0.198272	0	0.197564	0.000528549	0.320024	0.172705	0.175157	0.00153031	0.1229	0.150652	0.0916942	0.377261	0.381212	0.307887	0.318876	0.246534	0.326354	0.439854	0.35338	0.396531	0.396588	No	No	Yes	Yes	No	Yes	Yes	Yes	Yes	No
Prps2	chrX:163784265-163820631	0.0166667	NA	0	0	0.00555556	0	0.131352	NA	0	0.065676	0.5	0	0	0	0	NA	0.279688	1	0.33638	0.261029	0.469274	0.416667	0.0674076	0.574525	0.352866	No	No	Yes	Yes	No	Yes	Yes	Yes	Yes	No
Psmd10	chrX:137482964-137491250	0.307291	0	0.0343964	0.0242477	0.0914837	0.00292398	0.0290745	0	0	0.00969151	0	0	0.0510543	0.0235041	0.0248528	0.473698	0.116375	0.251314	0.345485	0.0420981	0.245794	0.392559	0.228239	0.424161	0.34832	No	No	Yes	Yes	No	Yes	Yes	Yes	Yes	No
Rab39b	chrX:72817397-72823543	NA	NA	NA	NA	NA	NA	NA	NA	NA	NA	NA	NA	NA	NA	NA	NA	0.363636	NA	NA	NA	0.363636	NA	NA	NA	NA	NA	NA	NA	NA	NA	NA	NA	NA	NA	NA
Rab9	chrX:162895191-162917626	0.386364	0	0.153846	0.265252	0.201365	0	0.274194	0	0.124481	0.132892	0.130435	0.00396825	0.204444	0.198895	0.135769	0.460784	0.160804	0.552486	0.423611	0.371134	0.393764	0.498239	0.444099	0.487562	0.476634	No	No	Yes	Yes	No	Yes	Yes	Yes	Yes	No
Rai2	chrX:158154968-158217426	NA	NA	NA	NA	NA	0	NA	NA	0	0	NA	NA	NA	NA	NA	NA	NA	NA	NA	NA	NA	NA	NA	NA	NA	NA	NA	NA	NA	NA	NA	NA	NA	NA	NA
Rap2c	chrX:48357089-48371195	0	0	0	0	0	NA	0.0769231	0	0	0.025641	0	0	0	0	0	NA	0.368421	NA	NA	0.18254	0.27548	0.6	0.204167	0.454545	0.419571	No	No	Yes	Yes	No	Yes	Yes	Yes	Yes	No
Rbbp7	chrX:136991142-137010679	0.194099	0	0.131748	0.134392	0.11506	0	0.334969	0.00131406	0.0533881	0.12989	0.175688	0.0120301	0.0929589	0.20223	0.102406	0.539075	0.206555	0.336124	0.662835	0.376036	0.424125	0.629405	0.362276	0.600916	0.530866	No	No	Yes	Yes	No	Yes	Yes	Yes	Yes	No
Rbm10	chrX:20194629-20228031	0.347222	0	0.333333	0.0820578	0.190653	NA	0.316399	0	0	0.105466	0.130065	0.0147059	0.132456	0.281765	0.142976	0.314904	0.195482	0.569359	0.612022	0.28869	0.396092	0.515837	0.519048	0.612727	0.549204	No	No	Yes	Yes	No	Yes	Yes	Yes	Yes	No
Rbm3	chrX:7716101-7722928	0.54358	0	0.0376298	0.270787	0.212999	0	0.390271	0	0.457945	0.282739	0.390327	0	0.139276	0.243669	0.127648	0.236715	0.209961	0.265896	0.0568202	0.366071	0.227093	0.475259	0.354745	0.494833	0.441612	No	No	No	Yes	No	No	Yes	No	Yes	Yes
Rbm41	chrX:136476067-136533134	0	0.125	0.5	NA	0.208333	NA	NA	0.5	NA	0.5	NA	NA	NA	NA	NA	NA	NA	0.5	NA	NA	0.5	0.541667	NA	0.538462	0.540064	Yes	NA	Yes	Yes	NA	No	No	NA	NA	No
Rbmx	chrX:54636525-54646213	0	0	0	0.0075188	0.0018797	0	0.1	0	0.0208333	0.0402778	0.140998	0	0.0318627	0.0374332	0.0230986	NA	0	0	NA	0.1	0.0333333	0.627248	0.317965	0.500831	0.482015	No	No	No	Yes	No	No	Yes	No	Yes	No
Rbmx2	chrX:46048181-46063896	0.375141	0	0	0.122736	0.124469	0	0.0694955	0	0	0.0231652	0.0962344	0	0	0.0334077	0.0111359	0.0441176	0.192105	0.694252	0.343401	0	0.254775	0.39291	0.113912	0.218728	0.24185	No	No	Yes	Yes	No	Yes	Yes	Yes	Yes	No
Renbp	chrX:71167460-71176189	0.286051	0.000429	0.205208	0.187559	0.169812	0.00936768	0.1789	0.00104313	0.358332	0.179425	0.269931	0.00118459	0.190566	0.175048	0.122266	0.331118	0.378793	0.362203	0.346	0.316305	0.346884	0.511343	0.377307	0.510508	0.466386	No	No	Yes	Yes	No	Yes	Yes	Yes	Yes	No
Reps2	chrX:158849886-159081533	0	NA	1	NA	0.5	NA	NA	0	0	0	0.264614	NA	0	NA	0	1	NA	0.636364	NA	0.210066	0.615477	NA	NA	NA	NA	No	No	Yes	NA	No	Yes	Yes	Yes	Yes	NA
Rgn	chrX:20126944-20139213	NA	NA	NA	NA	NA	NA	0.614771	NA	NA	0.614771	0.918765	NA	NA	NA	NA	NA	NA	0.641667	0.613674	0.366071	0.540471	NA	NA	NA	NA	NA	NA	NA	NA	NA	No	Yes	NA	NA	NA
Rhox1	chrX:34753800-34762253	NA	NA	NA	0	0	NA	NA	NA	NA	NA	NA	NA	NA	NA	NA	NA	0	NA	NA	NA	0	NA	NA	NA	NA	Yes	NA	No	NA	NA	NA	NA	NA	NA	NA
Rhox2a	chrX:34784987-34789685	NA	0	NA	NA	0	NA	NA	NA	NA	NA	NA	NA	NA	NA	NA	NA	NA	NA	NA	NA	NA	NA	NA	NA	NA	Yes	NA	NA	NA	NA	NA	NA	NA	NA	NA
Rhox2b	chrX:34826612-34831313	NA	1	NA	NA	1	NA	NA	NA	NA	NA	NA	NA	NA	NA	NA	NA	NA	NA	NA	NA	NA	NA	NA	NA	NA	Yes	NA	NA	NA	NA	NA	NA	NA	NA	NA
Rhox4a	chrX:34805370-34810130	NA	0	NA	0	0	NA	NA	NA	NA	NA	NA	NA	NA	NA	NA	NA	NA	NA	NA	NA	NA	NA	NA	NA	NA	Yes	NA	NA	NA	NA	NA	NA	NA	NA	NA
Rhox4g	chrX:35061008-35065834	NA	NA	NA	NA	NA	NA	NA	NA	NA	NA	0	NA	NA	NA	NA	NA	NA	NA	NA	NA	NA	0.6	NA	NA	0.6	NA	NA	NA	NA	NA	NA	NA	NA	NA	NA
Rhox6	chrX:35180232-35183034	0	0	NA	NA	0	NA	NA	NA	0.0340909	0.0340909	NA	NA	NA	NA	NA	NA	0.938672	NA	NA	NA	0.938672	0.324303	0.692308	0.469629	0.495413	No	NA	Yes	Yes	NA	Yes	Yes	NA	NA	No
Rhox9	chrX:35252274-35254947	NA	NA	NA	NA	NA	NA	NA	NA	0	0	NA	NA	NA	NA	NA	NA	0	NA	NA	NA	0	0.336285	NA	0.471166	0.403726	NA	NA	NA	NA	NA	No	Yes	NA	NA	No
Ribc1	chrX:148439127-148450838	0.826919	0	0.571429	0	0.349587	NA	0.0376984	0	0	0.0125661	0	0	0	NA	0	0.447222	0.477429	0.56097	0.361111	0.75387	0.52012	0.378932	0.384615	0.557462	0.440337	No	No	Yes	No	No	Yes	Yes	Yes	Yes	No
Ripply1	chrX:136314220-136316892	NA	NA	NA	NA	NA	NA	NA	NA	NA	NA	NA	NA	NA	NA	NA	NA	0	NA	NA	NA	0	NA	NA	NA	NA	NA	NA	NA	NA	NA	NA	NA	NA	NA	NA
Rlim	chrX:101157830-101161959	0.651767	0	0	0	0.162942	NA	0.00735294	0	0	0.00245098	0.085016	0.0227273	0.0182118	0	0.0136464	0.196184	0.228547	0.178846	NA	0	0.150894	0.377008	0.366905	0.521167	0.421693	No	No	No	Yes	No	Yes	Yes	Yes	Yes	No
Rnf128	chrX:162676875-162826965	0	0	0.0411988	0.06001	0.0253022	0	0	0	0.00064433	0.000214777	0.010355	0	0.00383142	0.0049062	0.00291254	0.182471	0.491615	NA	NA	0	0.224695	0.473207	0.251414	0.529658	0.418093	No	No	Yes	Yes	No	Yes	Yes	Yes	Yes	No
Rp2h	chrX:19941734-19977475	0.2	0	0	0.0603912	0.0650978	0	0.179487	NA	NA	0.179487	0.339713	0	0	0.0415954	0.0138651	NA	0.112045	NA	0.357143	0.155561	0.208249	0.49697	0.378039	NA	0.437505	Yes	No	Yes	Yes	No	No	Yes	Yes	Yes	NA
Rpgr	chrX:9735342-9793921	NA	0	NA	0.122807	0.0614035	NA	0.415585	0.0785714	0.0888889	0.194349	0.0533333	0.0634921	0.318203	0.384615	0.255437	NA	0.592711	0.755127	NA	0.843338	0.730392	0.5	0.5104	0.50412	0.50484	Yes	Yes	Yes	Yes	No	Yes	Yes	Yes	Yes	No
Rpl10	chrX:71516155-71518474	0.690705	0.00111607	0.651403	0.813374	0.53915	0.046	0.82308	0.00346021	0.651632	0.492724	0.789647	0.00655308	0.697865	0.602193	0.435537	0.681545	0.850901	0.875274	0.859215	0.891231	0.831633	0.912517	0.888158	0.913035	0.90457	No	No	Yes	Yes	No	Yes	Yes	Yes	Yes	No
Rpl36a	chrX:136357385-136406047	0.472261	0.00833333	0.314315	0.333095	0.282001	0.0564985	0.36648	0.00124553	0.474986	0.280904	0.442932	0.00187086	0.223129	0.307269	0.177423	0.567494	0.603926	0.620182	0.611859	0.508254	0.582343	0.692849	0.548808	0.699653	0.647103	No	No	Yes	Yes	No	Yes	Yes	Yes	Yes	No
Rps4x	chrX:99380282-99384645	0.416658	0.000559455	0.300873	0.277873	0.248991	0.0424745	0.327999	0.000314169	0.340789	0.223034	0.263092	0.00172535	0.238646	0.244718	0.161696	0.437989	0.430345	0.414639	0.404033	0.40988	0.419377	0.510649	0.374657	0.490156	0.458487	No	No	Yes	Yes	No	Yes	Yes	Yes	Yes	No
Rps6ka6	chrX:108501801-108651554	NA	0	NA	NA	0	NA	NA	NA	0	0	NA	NA	NA	NA	NA	NA	NA	NA	NA	NA	NA	NA	NA	0.7	0.7	No	NA	Yes	Yes	NA	Yes	Yes	NA	NA	No
Rragb	chrX:149574501-149606486	NA	NA	NA	NA	NA	NA	NA	NA	NA	NA	0	NA	NA	NA	NA	0	NA	NA	NA	NA	0	0.333333	NA	0	0.166667	NA	NA	NA	NA	NA	NA	NA	NA	NA	No
S100g	chrX:159399924-159402531	0.000506193	0	0	0	0.000126548	0.000669314	0	0	0.000589623	0.000196541	0.000556297	0.00285714	0	0	0.000952381	0	0	0	0	0	0	0.25164	0	0.269863	0.173834	No	No	No	Yes	No	No	Yes	No	Yes	No
Sash3	chrX:45499704-45514740	0	NA	NA	0.0478261	0.023913	0.0361345	NA	0	NA	0	0	0	0	0	0	0	NA	0	0	0.105351	0.0263378	NA	0	NA	0	No	No	No	No	No	No	No	No	No	NA
Sat1	chrX:151647681-151650952	0.0252294	0	0.0575022	0.139742	0.0556185	0	0.145536	0.00109589	0.0762813	0.0743044	0.0868045	0.000668896	0.0473373	0.10302	0.0503419	0.498937	0.225162	0.374803	0.408679	0.37084	0.375684	0.46	0.395394	0.428571	0.427989	No	No	Yes	Yes	No	Yes	Yes	Yes	Yes	No
Sept6	chrX:34451267-34529690	0	0	0	0	0	0	0	NA	NA	0	0	0	0	NA	0	NA	0	NA	NA	NA	0	NA	0	0.466667	0.233333	No	No	No	Yes	No	No	Yes	No	Yes	No
Sh3bgrl	chrX:106290746-106357806	0.0666667	0.136905	0.0178571	0.0116558	0.0582711	0.0047619	0.00452489	0	0.00512821	0.0032177	0.0341718	NA	0.0732091	0.0615385	0.0673738	0.0666667	0.154036	0.0692308	0.0666667	0.0203595	0.0753919	0.249876	0.0728205	NA	0.161348	No	No	No	Yes	No	No	Yes	No	No	NA
Sh3kbp1	chrX:156065340-156413849	0	0.307692	NA	0.0296296	0.112441	0.00617284	0.357143	0	NA	0.178571	NA	0	0.025	0.00606061	0.0103535	0	0	0	0	NA	0	NA	0	NA	0	No	No	No	No	No	No	No	No	No	NA
Shroom2	chrX:149044052-149204004	0	NA	0	0	0	0	NA	NA	0	0	NA	NA	NA	0	0	NA	NA	NA	NA	NA	NA	NA	0.307397	NA	0.307397	No	NA	Yes	Yes	No	NA	NA	NA	NA	NA
Siah1b	chrX:160508635-160513981	0.0861423	0.142857	0.196079	0.255529	0.170152	0.5	0.363545	0.146732	0.219241	0.243173	0.480386	0.140236	0.27758	0.315134	0.244316	0	0.194924	0.0333333	0	0.437963	0.133244	0.517012	0.307873	0.511968	0.445618	No	No	No	Yes	No	No	Yes	No	Yes	Yes
Slc10a3	chrX:71614556-71618595	0	0	0	NA	0	0	0.642857	0	NA	0.321429	0.0322581	NA	0.0909091	0	0.0454545	NA	0.333333	0.172414	0.0588235	NA	0.18819	0.333333	0	0.444444	0.259259	Yes	No	Yes	Yes	No	No	No	Yes	Yes	No
Slc16a2	chrX:100892753-101017327	NA	NA	NA	NA	NA	NA	NA	NA	NA	NA	NA	NA	0	0	0	NA	NA	NA	0	NA	0	NA	0	NA	0	NA	NA	NA	NA	NA	NA	NA	NA	NA	NA
Slc25a14	chrX:45976757-46015471	0	0	0	0.0652968	0.0163242	0	0.146218	0	0	0.0487392	0.0901454	0	0.0471618	0.00961538	0.0189257	0	0.125396	0.227847	0.697291	0	0.210107	0.3045	0.205713	0.40119	0.303801	No	No	Yes	Yes	No	Yes	Yes	Yes	Yes	No
Slc25a43	chrX:34283654-34317197	NA	NA	0	0.15	0.075	0	0.119048	0.0869565	0	0.068668	0	0	0.125	NA	0.0625	NA	NA	NA	0	NA	0	0.505814	0.4	NA	0.452907	No	No	No	Yes	No	No	Yes	No	Yes	NA
Slc35a2	chrX:6893718-6896484	0	0	0.0602007	0.289144	0.0873362	NA	0.448289	0	0.217442	0.22191	0.311495	0	0.170591	0.143694	0.104762	0.2383	0.293688	0.369502	0.329527	0.409142	0.328032	0.631839	0.509436	0.477316	0.53953	Yes	No	Yes	Yes	No	Yes	Yes	Yes	Yes	Yes
Slc38a5	chrX:7848518-7857302	0.125	0.125	NA	NA	0.125	NA	NA	NA	NA	NA	NA	NA	NA	0.166667	0.166667	NA	NA	NA	NA	NA	NA	0.24359	NA	NA	0.24359	NA	NA	Yes	Yes	NA	NA	NA	NA	NA	NA
Slc7a3	chrX:98274560-98280691	0.274181	0	0	0.0322163	0.0765993	NA	0	0	0.444058	0.148019	0.140019	0	0	0	0	0	NA	NA	NA	NA	0	0.465636	0.446429	0.45436	0.455475	No	No	No	Yes	No	No	Yes	No	Yes	No
Slc9a6	chrX:155970600-156031013	0.5	0	0	0	0.125	NA	0.117216	0	0	0.039072	0.00324675	0	0	0.00549451	0.0018315	NA	0.218908	0.214452	0	0.307232	0.185148	0.465969	0.187074	0.511186	0.388076	No	No	No	Yes	No	Yes	Yes	Yes	Yes	No
Smc1a	chrX:148450971-148496516	0.17541	0.00666667	0.231403	0.165507	0.144747	0	0.228365	0	0.112122	0.113496	0.160269	0	0.104655	0.337466	0.147374	0.356442	0.344122	0.354423	0.312258	0.341489	0.341747	0.631103	0.444306	0.585917	0.553775	No	No	Yes	Yes	No	Yes	Yes	Yes	Yes	Yes
Sms	chrX:70352974-70363041	0.285401	0	0.522862	0.380919	0.297296	0	0.504449	0	0.576297	0.360248	0.493515	0.00235849	0.43848	0.467799	0.302879	0.881486	0.654412	0.731689	0.624402	0.655693	0.709536	0.599249	0.651056	0.635545	0.628617	No	No	Yes	Yes	No	Yes	Yes	Yes	Yes	No
Snx12	chrX:98293125-98417902	0.268547	0	0.186225	0.266466	0.18031	0.285714	0.306895	0	0.000856164	0.102584	0.333508	0	0.32973	0.194441	0.174724	0.558292	0.423962	0.630381	0.47693	0.489842	0.515881	0.681056	0.382828	0.600013	0.554632	No	No	Yes	Yes	No	Yes	Yes	Yes	Yes	No
Sox3	chrX:58,144,541-58,146,605	0	NA	NA	NA	0	NA	NA	NA	NA	NA	NA	NA	NA	NA	NA	NA	NA	NA	NA	NA	NA	NA	NA	NA	NA	NA	NA	NA	NA	NA	NA	NA	NA	NA	NA
Spin2	chrX:150266836-150268783	0	0	NA	0	0	NA	0.173077	0.0454545	0	0.0728438	0	0.0147059	NA	0.251748	0.133227	NA	NA	NA	NA	NA	NA	0.659664	0.333333	0.641124	0.544707	No	NA	NA	Yes	No	NA	NA	NA	NA	No
Srpk3	chrX:71019761-71024263	0	NA	NA	0	0	NA	NA	NA	NA	NA	NA	NA	NA	0	0	NA	NA	0	NA	NA	0	NA	NA	0	0	NA	NA	No	No	NA	NA	NA	NA	NA	No
Srpx	chrX:130442965-130466989	NA	NA	0	NA	0	NA	NA	NA	NA	NA	NA	NA	NA	NA	NA	NA	NA	NA	0	NA	0	NA	NA	NA	NA	NA	NA	No	NA	NA	NA	NA	NA	NA	NA
Srpx2	chrX:130442965-130466989	0	NA	NA	NA	0	NA	NA	NA	NA	NA	NA	NA	NA	NA	NA	NA	NA	NA	NA	NA	NA	NA	NA	NA	NA	NA	NA	NA	NA	NA	NA	NA	NA	NA	NA
Stag2	chrX:39502589-39630352	NA	NA	0	0.291667	0.145833	NA	0.454545	0	NA	0.227273	0	NA	0.0588235	0.356322	0.207573	1	NA	NA	0.25	0.230769	0.49359	NA	0.45	NA	0.45	No	No	Yes	Yes	No	Yes	Yes	Yes	Yes	No
Stard8	chrX:96237920-96270067	0.4	0	NA	0	0.133333	0	NA	NA	0	0	0.166667	NA	0	NA	0	NA	NA	NA	NA	0	0	NA	NA	0.626838	0.626838	No	No	No	Yes	No	No	Yes	No	Yes	No
Suv39h1	chrX:7638297-7651886	NA	NA	0.383484	0.311146	0.347315	0	0.37963	0	NA	0.189815	0.0829741	0	0.186364	0.107143	0.0978355	0	0.683929	0.462567	0.461538	0.149479	0.351503	0.482639	0.693182	0.526915	0.567579	No	No	No	Yes	No	Yes	Yes	Yes	Yes	Yes
Syap1	chrX:159294775-159326394	0	0	0.21521	0.283226	0.124609	0	0.320663	0	0.0267857	0.115816	0.101931	0	0.091936	0.149034	0.0803232	0.39696	0.203071	0.271359	0.303555	0.176882	0.270365	0.571637	0.295648	0.496758	0.454681	No	No	Yes	Yes	No	Yes	Yes	Yes	Yes	Yes
Syn1	chrX:20437637-20498044	NA	NA	NA	NA	NA	NA	NA	NA	NA	NA	NA	NA	NA	NA	NA	NA	0	NA	NA	NA	0	NA	NA	NA	NA	NA	NA	NA	NA	NA	NA	NA	NA	NA	NA
Syp	chrX:7215706-7230382	NA	NA	NA	NA	NA	NA	NA	NA	NA	NA	NA	NA	NA	NA	NA	NA	0.306173	NA	NA	NA	0.306173	NA	NA	NA	NA	NA	NA	NA	NA	NA	NA	NA	NA	NA	NA
Sytl4	chrX:130470924-130516322	NA	NA	NA	NA	NA	0	NA	NA	NA	NA	NA	NA	NA	NA	NA	NA	NA	NA	NA	NA	NA	NA	NA	NA	NA	NA	NA	NA	NA	NA	NA	NA	NA	NA	NA
Tab3	chrX:82819361-82879808	0.0181818	NA	0.0123994	0	0.0101937	NA	NA	NA	0	0	0.25	NA	0.219849	0.0962194	0.158034	1	0.0854342	NA	0	0.142857	0.307073	NA	0.216696	NA	0.216696	No	Yes	Yes	Yes	Yes	Yes	Yes	Yes	No	No
Taf1	chrX:98728074-98797128	0.5	NA	NA	0.233333	0.366667	NA	0.176471	NA	0.333333	0.254902	0.613636	NA	0.193201	0.409737	0.301469	0.181818	0	0.483155	0.188406	0.217949	0.214266	0.142857	0.471541	0.52	0.378133	No	No	No	No	No	No	Yes	No	No	Yes
Taf9b	chrX:103402213-103416497	NA	0	NA	NA	0	0	NA	NA	0	0	NA	NA	0	0	0	NA	NA	NA	NA	0	0	0.463034	NA	NA	0.463034	No	No	No	Yes	No	No	Yes	No	Yes	NA
Taz	chrX:71528036-71535490	0	0	0.0559707	0.387401	0.110843	0	0.325315	0	0.280121	0.201812	0.396434	0	0.222186	0.18709	0.136425	0.385441	0.33439	0.375025	0.338502	0.241882	0.335048	0.512593	0.382778	0.61375	0.50304	No	No	Yes	Yes	No	Yes	Yes	Yes	Yes	Yes
Tbc1d25	chrX:7731598-7753307	0.176329	0	0.480603	0.144684	0.200404	0	0.190983	0	0.00877193	0.066585	0.489996	0	0.137659	0.297019	0.144893	0.189416	0.367529	0.319948	0.381304	0.341577	0.319955	0.527498	0.301691	0.316247	0.381812	No	No	Yes	Yes	No	Yes	Yes	Yes	Yes	No
Tbc1d8b	chrX:136219535-136288757	NA	NA	NA	NA	NA	NA	NA	NA	NA	NA	0	NA	NA	NA	NA	NA	NA	NA	NA	NA	NA	NA	NA	NA	NA	NA	NA	NA	NA	NA	NA	NA	NA	NA	NA
Tbl1x	chrX:74756566-74905604	0	0	0	0	0	0	0.093755	0	0	0.0312517	0.17045	0	0	0.0210714	0.00702381	1	0.177827	NA	NA	0.441697	0.539841	0.354497	0.366964	0.538462	0.419974	No	No	Yes	Yes	No	Yes	Yes	Yes	Yes	No
Tceal1	chrX:133242604-133244405	NA	NA	NA	NA	NA	0	NA	NA	0	0	NA	NA	0	NA	0	NA	NA	NA	NA	0	0	0	NA	NA	0	NA	NA	NA	NA	No	No	No	No	No	NA
Tceal3	chrX:133200914-133202916	NA	NA	NA	NA	NA	0	NA	NA	NA	NA	NA	NA	0	NA	0	NA	NA	NA	NA	NA	NA	NA	NA	NA	NA	NA	NA	NA	NA	NA	NA	NA	NA	NA	NA
Tceal6	chrX:131743225-131745226	NA	NA	NA	NA	NA	NA	NA	NA	NA	NA	0	NA	NA	NA	NA	NA	NA	NA	NA	NA	NA	NA	NA	NA	NA	NA	NA	NA	NA	NA	NA	NA	NA	NA	NA
Tceal8	chrX:132703523-132706790	0	NA	0	0	0	0	0	NA	0.0121951	0.00609756	0.264706	0	0	0	0	0	0	0.08	0	0.0344828	0.0228966	0.37931	0.127273	0.522613	0.343065	No	No	No	Yes	No	No	Yes	No	Yes	Yes
Tceanc	chrX:162937747-162948410	0	NA	0.0142857	0	0.0047619	NA	NA	NA	0	0	0	NA	NA	NA	NA	NA	0.75	0.533333	0.75	0.0948352	0.532042	NA	0.384615	NA	0.384615	No	NA	Yes	Yes	NA	Yes	Yes	NA	NA	NA
Tcfe3	chrX:7461370-7471618	0.172727	0	0.097561	0.365207	0.158874	0	0.307778	0	0.366793	0.224857	0.215119	0	0.206114	0.194835	0.13365	0	0.390732	0.315414	0.288439	0.224915	0.2439	0.453439	0.276028	0.537665	0.422378	No	No	No	Yes	No	No	Yes	Yes	Yes	Yes
Tex11	chrX:98033987-98254978	NA	0	NA	NA	0	1	NA	NA	NA	NA	NA	NA	NA	NA	NA	NA	NA	NA	NA	NA	NA	0.321429	NA	0.296703	0.309066	Yes	NA	Yes	Yes	NA	NA	NA	NA	NA	No
Tex13	chrX:137342846-137347972	NA	NA	NA	NA	NA	NA	NA	NA	NA	NA	NA	NA	NA	NA	NA	NA	0.398216	NA	NA	NA	0.398216	0.850201	NA	0.397576	0.623888	NA	NA	NA	NA	NA	NA	NA	NA	NA	No
Thoc2	chrX:7418957-7451986	0	0	0.36241	0.207684	0.142524	NA	0.147907	0	0	0.0493023	0.243771	0	0.0635165	0.0483556	0.0372907	0.506628	0.176997	0.607887	0.503849	0.472216	0.453515	0.473958	0.304061	0.418903	0.398974	No	No	Yes	Yes	No	Yes	Yes	Yes	Yes	No
Timm17b	chrX:131120193-131122601	0.403015	0	0.260201	0.264221	0.231859	0.0408307	0.320121	0.0011534	0.135161	0.152145	0.252056	0	0.2175	0.275981	0.164494	0.410669	0.267905	0.499912	0.446204	0.286309	0.3822	0.478009	0.308742	0.431075	0.405942	No	No	Yes	Yes	No	Yes	Yes	Yes	Yes	No
Timm8a1	chrX:53708016-53761020	0.896884	0	0.234848	0.263889	0.348905	0	0.742122	0	0	0.247374	0.701379	0	0	0.481481	0.160494	0.816667	0.638889	0.978593	0.906863	0.875	0.843202	0.964779	0.959233	0.958101	0.960704	No	No	Yes	Yes	No	Yes	Yes	Yes	Yes	No
Timp1	chrX:20447292-20451863	0.153709	0	0	0.0357819	0.0473727	0.03125	0.362869	0	0.1727	0.178523	0	0	0.0401993	0.00943396	0.0165444	0.266917	NA	NA	NA	0	0.133459	0.239746	0.289716	0.587001	0.372154	Yes	No	No	Yes	No	No	Yes	Yes	Yes	No
Tktl1	chrX:71422598-71453837	NA	NA	0	NA	0	NA	0	NA	NA	0	0.222222	NA	NA	NA	NA	NA	NA	NA	NA	0	0	NA	NA	NA	NA	No	NA	No	NA	NA	No	Yes	NA	NA	NA
Tlr13	chrX:103338614-103355832	NA	NA	NA	0	0	0	NA	NA	0	0	NA	NA	0	NA	0	NA	NA	0	0	NA	0	NA	0	NA	0	No	No	No	No	No	No	No	No	No	NA
Tlr7	chrX:163742863-163768460	NA	NA	NA	NA	NA	NA	NA	NA	NA	NA	NA	NA	NA	NA	NA	NA	NA	NA	NA	0	0	NA	NA	NA	NA	NA	NA	NA	NA	NA	NA	NA	NA	NA	NA
Tmem164	chrX:139115961-139272781	NA	NA	NA	0	0	0	NA	NA	NA	NA	0	NA	0	0	0	NA	0	NA	NA	0	0	NA	0.1	0.321678	0.210839	NA	NA	No	Yes	NA	NA	NA	NA	NA	No
Tmem29	chrX:146832316-146893693	0.189142	0.00163934	0.0924375	0.20963	0.123212	0	0.286359	0	0.360892	0.21575	0.146547	0	0.222297	0.171851	0.131383	0.214121	0.264415	0.323808	0.366445	0.294203	0.292598	0.505151	0.24795	0.478678	0.410593	No	No	Yes	Yes	No	No	Yes	Yes	Yes	No
Tmem35	chrX:130829764-130840508	NA	NA	NA	NA	NA	NA	NA	NA	NA	NA	0	NA	NA	NA	NA	NA	NA	NA	NA	NA	NA	NA	NA	NA	NA	NA	NA	NA	NA	NA	NA	NA	NA	NA	NA
Tmem47	chrX:78315983-78343214	0	NA	NA	NA	0	NA	NA	NA	NA	NA	NA	NA	NA	0	0	NA	NA	NA	NA	NA	NA	NA	NA	NA	NA	NA	NA	NA	NA	NA	NA	NA	NA	NA	NA
Tmsb15a	chrX:132253206-132255212	0	NA	NA	NA	0	NA	NA	NA	NA	NA	NA	NA	NA	NA	NA	NA	NA	NA	NA	NA	NA	NA	NA	NA	NA	NA	NA	NA	NA	NA	NA	NA	NA	NA	NA
Tmsb15b1	chrX:133508561-133511413	0.00520833	0.142857	0.151515	0.108108	0.101922	0.30137	0.0851064	0	0.0720721	0.0523928	0.0714286	0.130435	0.277778	0.333333	0.247182	NA	0.107143	0.0909091	0.210526	0.375	0.195895	0.4375	0.24	0.5	0.3925	No	Yes	No	Yes	Yes	Yes	Yes	No	Yes	No
Tmsb15b1-Tmsb15b2	chrX:133489529-133511390	0.00223214	0.0204082	0.021645	0.015444	0.0149323	0.0430528	0.0483372	0	0.030888	0.0264084	0.0306122	0.0186335	0.0396825	0.179167	0.0791609	NA	0.0153061	0.0715152	0.0350877	0.0535714	0.0438701	0.274633	0.12	0.560606	0.318413	No	No	No	Yes	No	No	Yes	No	Yes	No
Tmsb15b2	chrX:133489805-133492518	0	0	0	0	0	0	0.0316568	0	0	0.0105523	0	0	0	0.127778	0.0425926	NA	0	0.0666667	0	0	0.0166667	0.233916	0	0.590909	0.274942	No	No	No	Yes	No	No	Yes	No	Yes	No
Trap1a	chrX:45694535-45759905	0.107438	0	0	0	0.0268595	NA	0.00684932	0	0	0.00228311	0.05	0	0	0	0	NA	0	0.285714	0	0	0.0714286	0.150685	0.137931	0.185185	0.157934	No	No	No	Yes	No	No	Yes	No	Yes	No
Trappc2	chrX:162878757-162890475	0	0	0.0333083	0.00660066	0.00997723	0	0	0	0	0	0.0144928	0	0.0238095	0.0871918	0.0370004	0.0444444	0.0192308	0.0804598	0.0897222	0.0501208	0.0567956	0.058403	0.0497512	0.0903518	0.0661687	No	No	No	No	No	No	No	No	No	No
Trex2	chrX:70679044-70680682	0	NA	NA	NA	0	NA	NA	NA	NA	NA	NA	NA	NA	NA	NA	NA	NA	NA	NA	NA	NA	NA	NA	NA	NA	NA	NA	NA	NA	NA	NA	NA	NA	NA	NA
Trmt2b	chrX:130757494-130811523	NA	0.125	0.05	0.0357143	0.0702381	0.0416667	0.333333	0.166667	0.0441306	0.181377	0.05	0	0.0680272	0	0.0226757	0	0.176471	0	NA	0.336673	0.128286	0.411765	0.359615	0.422893	0.398091	Yes	No	No	Yes	No	No	Yes	Yes	Yes	No
Tsc22d3	chrX:54484662-54591906	0.11216	0.0625	0.0893774	0.0809119	0.0862373	0.101562	0.102089	0.110669	0.122783	0.111847	0.0813519	0.0707757	0.067161	0.0703044	0.0694137	0.12014	0.100275	0.117929	0.126692	0.0761473	0.108237	0.456519	0.150306	0.410351	0.339059	No	No	No	Yes	No	No	Yes	No	Yes	Yes
Tsix	chrX:100626856-100680296	NA	NA	1	NA	1	NA	NA	NA	NA	NA	0	NA	NA	NA	NA	0.953526	0.291667	0.937729	1	NA	0.79573	NA	NA	NA	NA	NA	NA	No	NA	NA	NA	NA	NA	NA	NA
Tspan6	chrX:130425609-130432968	0	0	NA	NA	0	NA	NA	0	0	0	0.0666667	NA	0	0	0	NA	NA	NA	NA	NA	NA	0.405952	0	0.610087	0.33868	No	No	NA	Yes	No	Yes	Yes	Yes	Yes	No
Tspan7	chrX:10062242-10173730	NA	NA	NA	0	0	0	0.333333	NA	NA	0.333333	0	0.00657895	0.0571895	NA	0.0318842	NA	NA	NA	NA	0	0	NA	0.116883	0	0.0584416	Yes	No	No	No	No	No	No	No	No	No
Tspyl2	chrX:148771395-148777027	0	NA	0.227273	NA	0.113636	NA	NA	0.166667	0	0.0833333	0.221121	NA	0.0706684	0.0833333	0.0770009	NA	0.0333333	0	0	0	0.00833333	0.5	0.41866	NA	0.45933	No	No	No	Yes	No	No	Yes	No	Yes	NA
Tsr2	chrX:147521637-147531086	0.172261	0	0.194783	0.159159	0.131551	0	0.174796	0	0	0.0582652	0.0745592	0	0.0550386	0.108156	0.0543983	0.634408	0.244005	0.47651	0.115303	0.201287	0.334302	0.457662	0.410751	0.504252	0.457555	No	No	Yes	Yes	No	Yes	Yes	Yes	Yes	Yes
Tsx	chrX:100609806-100619922	0.0791317	0	0	0	0.0197829	0	0.166233	0	0	0.055411	0	0.0526316	NA	NA	0.0526316	NA	0.54375	NA	0	0.597826	0.380525	0	0	NA	0	No	No	Yes	No	No	Yes	No	Yes	No	NA
Uba1	chrX:69208360-69218067	0.397511	0	0.341949	0.298644	0.259526	0	0.368176	0.0025	0.544469	0.305048	0.344327	0	0.18082	0.218172	0.132997	0.525753	0.325752	0.357916	0.405388	0.395282	0.402018	0.461904	0.415738	0.494834	0.457492	No	No	Yes	Yes	No	No	Yes	Yes	Yes	No
Ube2a	chrX:34414361-34424217	0	0	0.412862	0.230755	0.160904	0	0.372691	0	0.361602	0.244764	0.245531	0	0.149662	0.259242	0.136301	0.0667749	0.22898	0.345129	0.352799	0.168503	0.232437	0.357709	0.41999	0.404021	0.393907	No	No	No	Yes	No	No	Yes	No	Yes	Yes
Ube2dnl	chr3:78770497-78770724	0.509334	0	0.365326	0.362339	0.30925	NA	NA	0.0833333	0	0.0416667	0.0701449	0	0.14178	0	0.0472599	NA	NA	0.210241	0.696154	NA	0.453197	0.492556	0.500969	0.420904	0.471476	No	No	Yes	Yes	No	Yes	Yes	Yes	Yes	No
Ubl4	chrX:71612740-71613866	0.157343	0	0.27027	0.246935	0.168637	0	0.253333	0	0.165746	0.139693	0.286049	0	0.295082	0.180328	0.15847	0.488506	0.344965	0.458967	0.51418	0.476043	0.456532	0.482578	0.479208	0.498638	0.486808	No	No	Yes	Yes	No	Yes	Yes	Yes	Yes	No
Ubqln2	chrX:149932775-149936105	NA	0	NA	0	0	NA	NA	0	NA	0	0	NA	0	NA	0	NA	NA	NA	NA	0.666667	0.666667	NA	0.545455	NA	0.545455	No	No	Yes	Yes	No	Yes	Yes	Yes	Yes	NA
Upf3b	chrX:34631829-34650317	0.75	NA	NA	NA	0.75	NA	0.416667	NA	0.888889	0.652778	0	0	0.0666667	0	0.0222222	NA	0.230769	0.5	0.25	NA	0.326923	0.572727	0.535714	0.933333	0.680592	No	No	No	No	No	No	No	Yes	Yes	No
Uprt	chrX:101678121-101701601	NA	NA	NA	NA	NA	0	NA	NA	NA	NA	NA	NA	NA	NA	NA	NA	NA	NA	NA	NA	NA	NA	NA	NA	NA	NA	NA	NA	NA	NA	NA	NA	NA	NA	NA
Usp11	chrX:20281035-20297665	0	NA	NA	NA	0	NA	NA	NA	0	0	0	NA	0	0	0	0.636364	0.273543	NA	NA	0.151082	0.353663	NA	NA	NA	NA	No	No	Yes	NA	No	Yes	Yes	Yes	Yes	NA
Usp9x	chrX:12648624-12750454	0	0	NA	0.3875	0.129167	0	NA	0	0	0	0.277943	0	0.0714286	0.181344	0.0842576	0	0.380952	0.230769	0.0263158	0.366103	0.200828	0.75	0.307226	0.176282	0.411169	No	No	No	Yes	No	Yes	Yes	Yes	Yes	Yes
Utp14a	chrX:45610111-45635626	0.476594	0	0.261457	0.298215	0.259066	0	0.33845	0	0	0.112817	0.266992	0	0.147459	0.240159	0.129206	0.400736	0.0741979	0.370553	0.589861	0.270649	0.341199	0.73962	0.562568	0.394762	0.56565	No	No	No	Yes	No	Yes	Yes	Yes	Yes	Yes
Uxt	chrX:20528791-20539104	NA	NA	NA	NA	NA	NA	NA	NA	1	1	0	0	NA	NA	0	0.166667	NA	NA	NA	NA	0.166667	0.625	NA	NA	0.625	NA	NA	NA	NA	No	No	No	Yes	Yes	NA
Vbp1	chrX:72759636-72780285	0.174074	0	0.175926	0.210674	0.140169	0	0.222772	0	0.0560166	0.0929296	0.0431034	0.00203666	0.197065	0.329193	0.176098	0.42315	0.387586	0.394913	0.507757	0.423963	0.427474	0.451565	0.394046	0.530421	0.458677	No	No	Yes	Yes	No	Yes	Yes	Yes	Yes	No
Vgll1	chrX:54341283-54358623	NA	0.2	0.139098	0.5	0.279699	NA	0.166667	0.179048	0.141851	0.162522	0.457172	0.166667	0.214719	0.359091	0.246825	0.666667	0.333445	0.5	NA	0.25	0.437528	0.559846	NA	0.5	0.529923	No	No	Yes	Yes	No	Yes	Yes	Yes	Yes	No
Vsig4	chrX:93442542-93488777	0	0	0	0	0	0	0	0	0	0	NA	NA	0	0	0	0	0	0	0	NA	0	NA	0	NA	0	No	No	No	No	No	No	No	No	No	NA
Was	chrX:7658592-7667617	NA	0	NA	NA	0	0	NA	NA	0	0	NA	NA	NA	NA	NA	NA	NA	NA	NA	NA	NA	NA	NA	NA	NA	No	NA	NA	NA	NA	NA	NA	NA	NA	NA
Wbp5	chrX:136145159-136207684	0.193772	0.000318471	0	0.0142226	0.0520782	0.000496032	0.2707	0.00789825	0	0.0928659	0.0785174	0	0.0308332	0.0486188	0.026484	0.479141	0.118973	0.254756	0.246649	0.0312549	0.226155	0.48876	0.465923	0.502441	0.485708	No	No	Yes	Yes	No	Yes	Yes	Yes	Yes	Yes
Wdr13	chrX:7700427-7709984	0.384615	NA	1	0.2	0.528205	0	NA	0	1	0.5	0	NA	0.494444	0	0.247222	0.733333	NA	0.4	0	0.184314	0.329412	NA	0.278874	0.411765	0.345319	No	No	No	No	No	No	No	No	No	No
Wdr44	chrX:23270243-23383128	NA	0	0.0384615	0.106781	0.0484143	0.0106383	NA	0	0.0375	0.01875	0	NA	0.171123	0.0946023	0.132863	NA	0.103239	0.227273	0	0.363636	0.173537	0.6	NA	NA	0.6	No	No	Yes	Yes	Yes	Yes	Yes	No	Yes	NA
Wdr45	chrX:7299375-7305327	0.217391	0	0.110497	0.0967742	0.106166	0	0.232258	0	0.20625	0.146169	0.258065	0	0.240385	0.246914	0.162433	0.32967	0.473054	0.460581	0.556886	0.373626	0.438764	0.6	0.614865	0.726316	0.64706	No	No	Yes	Yes	No	Yes	Yes	Yes	Yes	Yes
Wnk3-ps	chrX:147642293-147661207	NA	0	NA	0.454545	0.227273	NA	NA	0	NA	0	NA	NA	NA	NA	NA	NA	NA	NA	NA	NA	NA	NA	NA	NA	NA	No	NA	NA	Yes	NA	NA	NA	NA	NA	NA
Xiap	chrX:39421013-39462841	0.11135	0	0.0449332	0.44889	0.151293	0	0.151346	0	0.424208	0.191851	0.173018	0	0.122133	0.156196	0.0927762	NA	0.388889	NA	0.50055	0.00555556	0.298332	0.56158	0.308798	0.269518	0.379965	No	No	Yes	Yes	No	Yes	Yes	Yes	Yes	No
Xist	chrX:100655712-100678572	1	0	0.786339	0.841212	0.656888	NA	0.933333	NA	0.227778	0.580556	0.689168	NA	0.982143	0.841176	0.91166	0.519583	0.470796	0.351802	0.578232	0.755752	0.535233	0.47859	0.459621	0.414776	0.450996	No	Yes	No	No	Yes	No	No	No	No	No
Xk	chrX:8849910-8890371	NA	NA	NA	NA	NA	NA	NA	NA	NA	NA	NA	NA	NA	NA	NA	NA	NA	NA	NA	NA	NA	NA	0.8	NA	0.8	NA	NA	NA	NA	NA	NA	NA	NA	NA	NA
Xkrx	chrX:130683584-130696467	NA	NA	0	0	0	NA	NA	0	NA	0	NA	NA	NA	0	0	NA	NA	NA	NA	NA	NA	NA	0.455822	NA	0.455822	No	NA	NA	Yes	No	NA	NA	NA	NA	NA
Xlr	chrX:70394180-70403738	0	0	NA	0.0104167	0.00347222	0	0.333333	NA	0	0.166667	0.0690359	0	NA	NA	0	0	NA	NA	NA	NA	0	0.349105	NA	0.602941	0.476023	Yes	No	No	Yes	No	No	Yes	No	Yes	No
Xlr3a	chrX:70331632-70342434	0	0	0.0333333	0.00238095	0.00892857	NA	0	0	0.00855379	0.00285126	0.112099	0.0166667	0	0	0.00555556	NA	0	NA	NA	0.785714	0.392857	0.369765	NA	0.41791	0.393837	No	No	Yes	Yes	No	Yes	Yes	Yes	Yes	No
Xlr3b	chrX:70437518-70448269	0.313725	0	0	0.333333	0.161765	NA	0.514706	0	0	0.171569	0.547744	0	0.333333	0.333333	0.222222	NA	0.539794	NA	0	0.535714	0.358503	0.825792	NA	0.800831	0.813311	No	No	Yes	Yes	No	Yes	Yes	Yes	Yes	No
Xlr3c	chrX:70499879-70510729	0.0151515	0	NA	0.015625	0.0102588	NA	0.015873	NA	0	0.00793651	0.0923983	0	0	0.0909091	0.030303	NA	0.188622	NA	NA	NA	0.188622	0.604821	NA	0.491389	0.548105	No	No	Yes	Yes	No	Yes	Yes	Yes	Yes	No
Xlr4a	chrX:70319684-70327846	0.0426304	NA	0.416667	0.018607	0.159301	NA	0.363636	NA	0.05	0.206818	0.13697	0.0100193	0.62381	0.473684	0.369171	NA	0.94436	NA	NA	1	0.97218	0.522103	NA	0.410541	0.466322	No	Yes	Yes	Yes	Yes	Yes	Yes	Yes	No	No
Xlr4b	chrX:70459704-70467792	0	0	0	0	0	0	0	0	0.0384615	0.0128205	0.137998	0.0333333	0	0	0.0111111	NA	0.176165	NA	0	0	0.0587215	0.333333	0	0.443376	0.258903	No	No	No	Yes	No	No	Yes	No	Yes	No
Xlr4c	chrX:70479415-70488469	0.142857	0.0681818	0	0.25	0.11526	NA	0.0606061	0.0333333	0.141708	0.078549	0.404214	0.178571	0	0	0.0595238	NA	0.0651048	0	NA	0	0.0217016	0.625	0.266667	0.50313	0.464932	No	No	No	Yes	No	No	Yes	No	Yes	No
Xlr5a	chrX:108688813-108810688	0.166667	0	0	0	0.0416667	NA	0	NA	0	0	0.129818	0	0	0	0	NA	0.25431	NA	NA	0.125	0.189655	0.210188	NA	0.236316	0.223252	No	No	Yes	Yes	No	Yes	Yes	Yes	Yes	No
Xlr5b	chrX:70394180-70403738	NA	NA	0	0	0	NA	NA	0.135714	NA	0.135714	NA	NA	0	0.0931818	0.0465909	NA	NA	NA	NA	NA	NA	NA	NA	NA	NA	Yes	NA	NA	NA	No	NA	NA	NA	NA	NA
Xlr5c	chrX:70530536-70535854	NA	NA	NA	NA	NA	NA	0.2	NA	0	0.1	NA	NA	NA	NA	NA	NA	NA	NA	NA	NA	NA	NA	NA	NA	NA	NA	NA	NA	NA	NA	NA	NA	NA	NA	NA
Xpnpep2	chrX:45461902-45490158	NA	NA	NA	NA	NA	0.166667	0	NA	NA	0	NA	NA	0	NA	0	NA	0	NA	NA	NA	0	NA	NA	NA	NA	NA	NA	NA	NA	No	No	Yes	No	Yes	NA
Yipf6	chrX:96133120-96144360	0.0683326	0	0.396112	0.325147	0.197398	NA	0	0	0.0901709	0.030057	0.612047	0	0.168092	0.145312	0.104468	0	NA	0.400458	0	0.257393	0.164463	0.463618	0.36575	0.895772	0.575047	No	No	No	Yes	No	Yes	Yes	No	Yes	No
Yy2	chrX:154004051-154006917	NA	NA	NA	0	0	NA	NA	NA	NA	NA	0.186275	NA	0.363636	NA	0.363636	0.305769	NA	NA	1	NA	0.652885	0.322917	0.388306	NA	0.355611	NA	No	Yes	Yes	NA	NA	NA	No	No	NA
Zbtb33	chrX:35542970-35550223	NA	NA	NA	NA	NA	NA	NA	NA	NA	NA	0.509091	NA	NA	NA	NA	0	NA	NA	NA	NA	0	0.741886	NA	0.575451	0.658669	NA	NA	NA	NA	NA	NA	NA	NA	NA	No
Zc4h2	chrX:92834536-92853771	NA	NA	NA	NA	NA	NA	NA	NA	NA	NA	0	NA	NA	NA	NA	NA	NA	NA	NA	NA	NA	NA	NA	0.38776	0.38776	NA	NA	NA	NA	NA	NA	NA	NA	NA	No
Zcchc12	chrX:33,735,899-33,739,153	NA	NA	NA	NA	NA	NA	NA	NA	NA	NA	0	NA	NA	NA	NA	NA	NA	NA	NA	NA	NA	NA	NA	NA	NA	NA	NA	NA	NA	NA	NA	NA	NA	NA	NA
Zcchc18	chrX:133527694-133531462	NA	NA	NA	NA	NA	0	NA	NA	NA	NA	NA	NA	NA	NA	NA	NA	NA	NA	NA	NA	NA	NA	NA	NA	NA	NA	NA	NA	NA	NA	NA	NA	NA	NA	NA
Zdhhc15	chrX:101732309-101866403	NA	NA	NA	NA	NA	0	NA	NA	NA	NA	NA	NA	NA	NA	NA	NA	NA	NA	0	NA	0	0.454545	NA	NA	0.454545	NA	NA	NA	NA	NA	NA	NA	NA	NA	NA
Zdhhc9	chrX:45525148-45561879	0	0	0	0	0	0	0.08	0	NA	0.04	0	0	0.0132962	0.0238095	0.0123686	0	0.192892	0.251515	0	0	0.0888814	0.523103	0.272101	0.364469	0.386558	No	No	No	Yes	No	No	Yes	No	Yes	Yes
Zfp182	chrX:20603310-20639164	1	NA	NA	0	0.5	0	0.145604	NA	NA	0.145604	NA	NA	NA	0	0	NA	NA	NA	NA	0.700779	0.700779	NA	0.2	0.383333	0.291667	No	No	Yes	No	No	Yes	Yes	Yes	Yes	No
Zfp185	chrX:70232678-70276882	0.5	NA	0	0.308777	0.269592	NA	0.666667	0	0.343111	0.336592	0.166667	NA	0.362688	0.444444	0.403566	NA	NA	NA	NA	0.333333	0.333333	NA	NA	0.670426	0.670426	No	Yes	No	Yes	No	No	Yes	No	Yes	No
Zfp275	chrX:70587959-70604419	0	NA	0	NA	0	NA	NA	NA	NA	NA	0	NA	NA	NA	NA	NA	NA	NA	NA	NA	NA	NA	NA	NA	NA	NA	NA	Yes	NA	NA	NA	NA	NA	NA	NA
Zfp280c	chrX:45894803-45947629	NA	0.142857	0.0819892	0	0.0749488	NA	NA	NA	NA	NA	NA	NA	0.00549451	0	0.00274725	NA	NA	NA	0.833333	NA	0.833333	0.358333	NA	0.5	0.429167	NA	NA	Yes	Yes	NA	NA	NA	NA	NA	No
Zfx	chrX:91319970-91368746	0	0	0	0.2	0.05	NA	NA	0	NA	0	NA	0	0.116427	0.285556	0.133994	NA	0.33609	0	NA	0	0.11203	NA	0.3894	0.785714	0.587557	No	No	No	Yes	Yes	Yes	Yes	No	Yes	No
Zic3	chrX:55283805-55289807	NA	0	NA	NA	0	NA	NA	0	0.116667	0.0583333	NA	NA	NA	NA	NA	NA	NA	NA	NA	NA	NA	0.391304	NA	0.551282	0.471293	No	NA	NA	Yes	NA	NA	NA	NA	NA	No
Zmat1	chrX:131505912-131543748	NA	NA	NA	NA	NA	NA	NA	NA	NA	NA	NA	NA	NA	NA	NA	NA	NA	NA	NA	0	0	NA	NA	NA	NA	NA	NA	NA	NA	NA	NA	NA	NA	NA	NA
Zmym3	chrX:98599723-98616024	1	NA	NA	NA	1	NA	0	0	0	0	0	0	0.0952381	NA	0.047619	0.428571	NA	0.833333	0.719453	0.590909	0.643067	NA	0.375	NA	0.375	No	No	No	No	No	Yes	Yes	Yes	Yes	NA
Zrsr2	chrX:160373375-160396598	0.348196	0.00138889	0.0820409	0.380855	0.20312	0	0.312883	0.00186916	0.283171	0.199307	0.200629	0.0296508	0.115829	0.24215	0.12921	0.325954	0.361619	0.292128	0.195342	0.342382	0.303485	0.542312	0.349558	0.552948	0.481606	No	No	Yes	Yes	No	Yes	Yes	Yes	Yes	No
Zxdb	chrX:91969908-91975530	NA	NA	NA	NA	NA	NA	NA	NA	0	0	NA	NA	NA	NA	NA	NA	NA	NA	NA	NA	NA	NA	NA	NA	NA	NA	NA	NA	NA	NA	NA	NA	NA	NA	NA
