# Supplementary figures and images for: Conversion of random X-inactivation to imprinted X-inactivation by maternal PRC2
Source: eLife journal article supplement (doi:10.7554/elife.44258), 2019-04-02

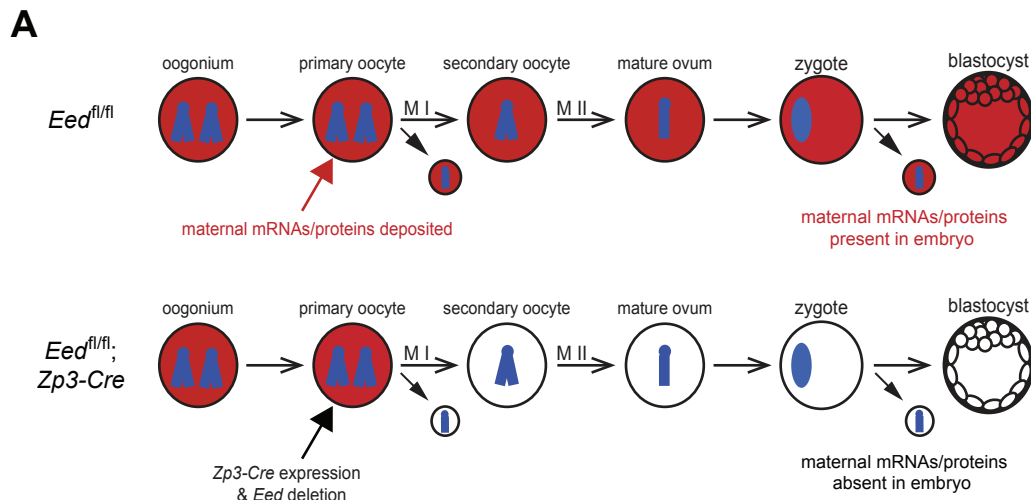**B**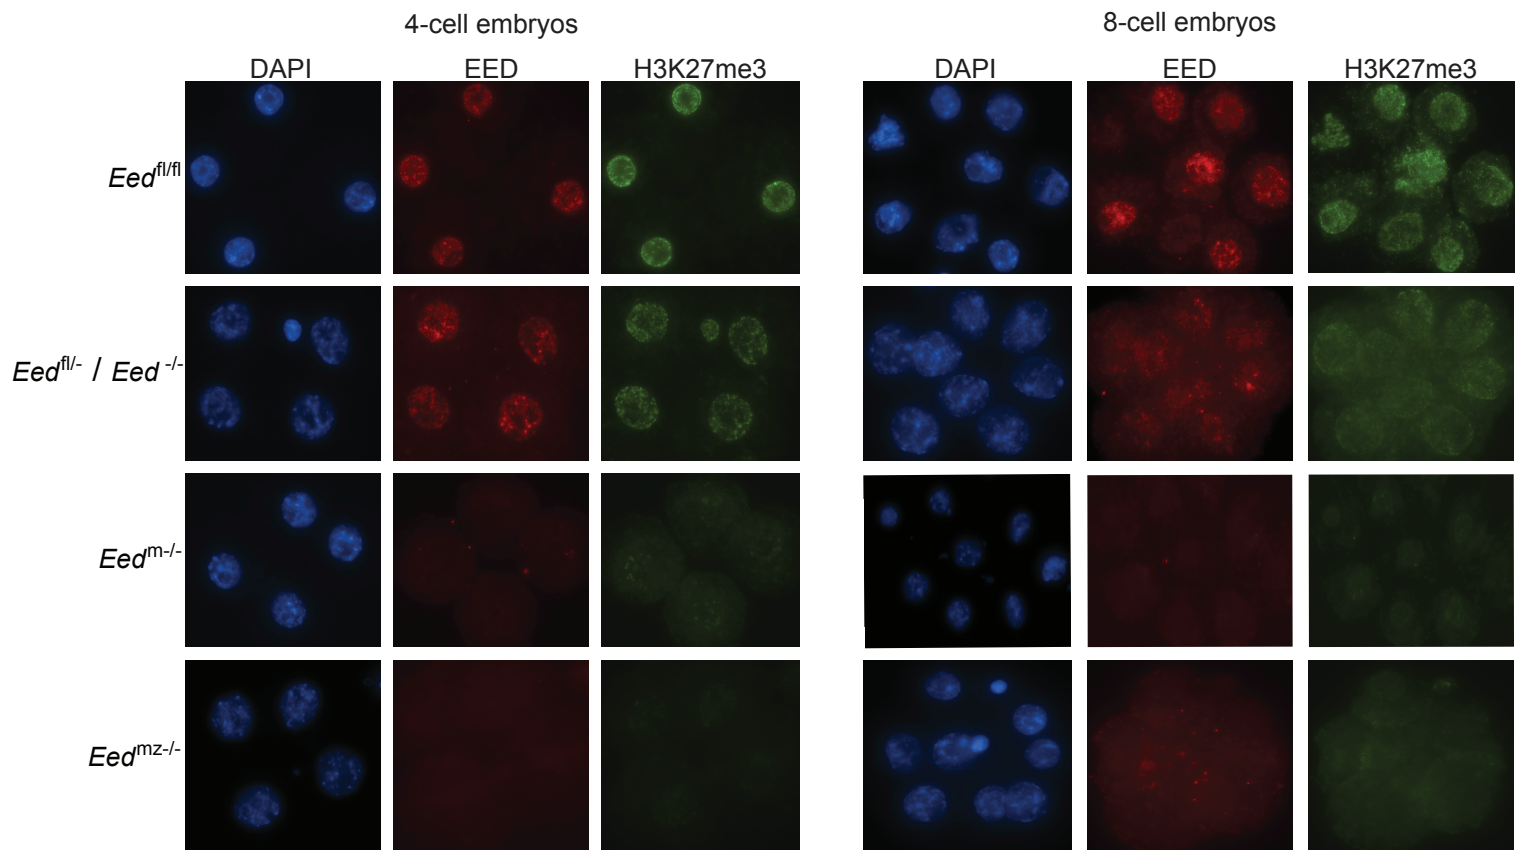

Supplement: supp [file elife-44258-supp-v1.zip]

**A**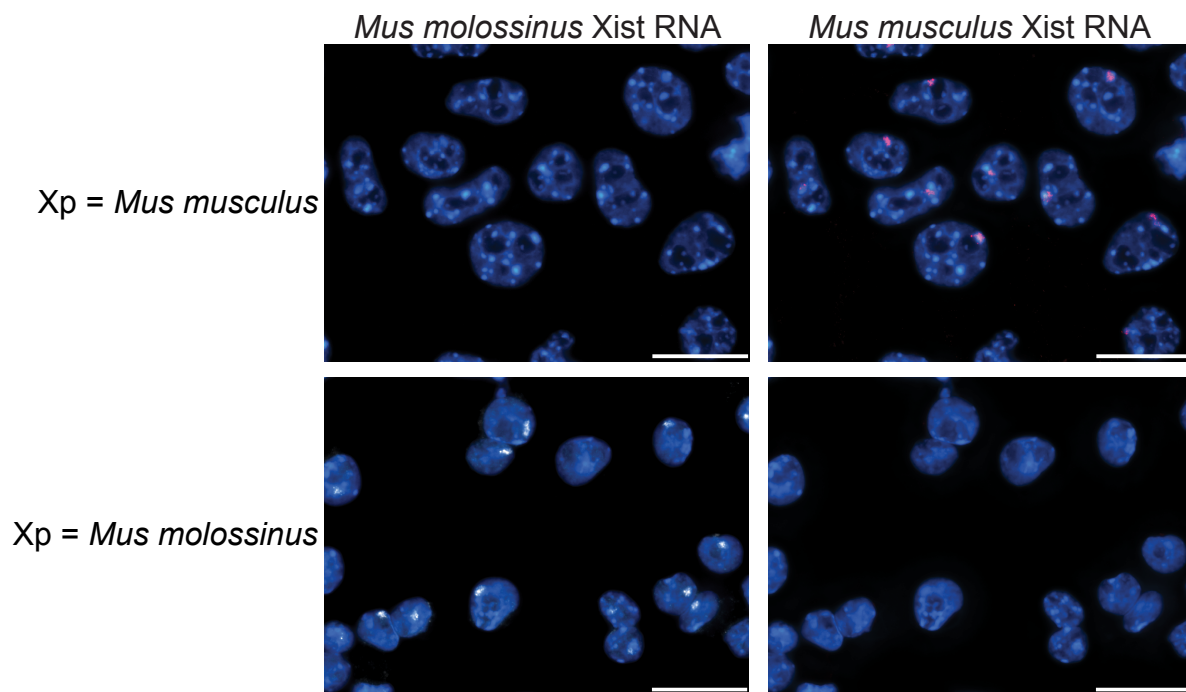**B**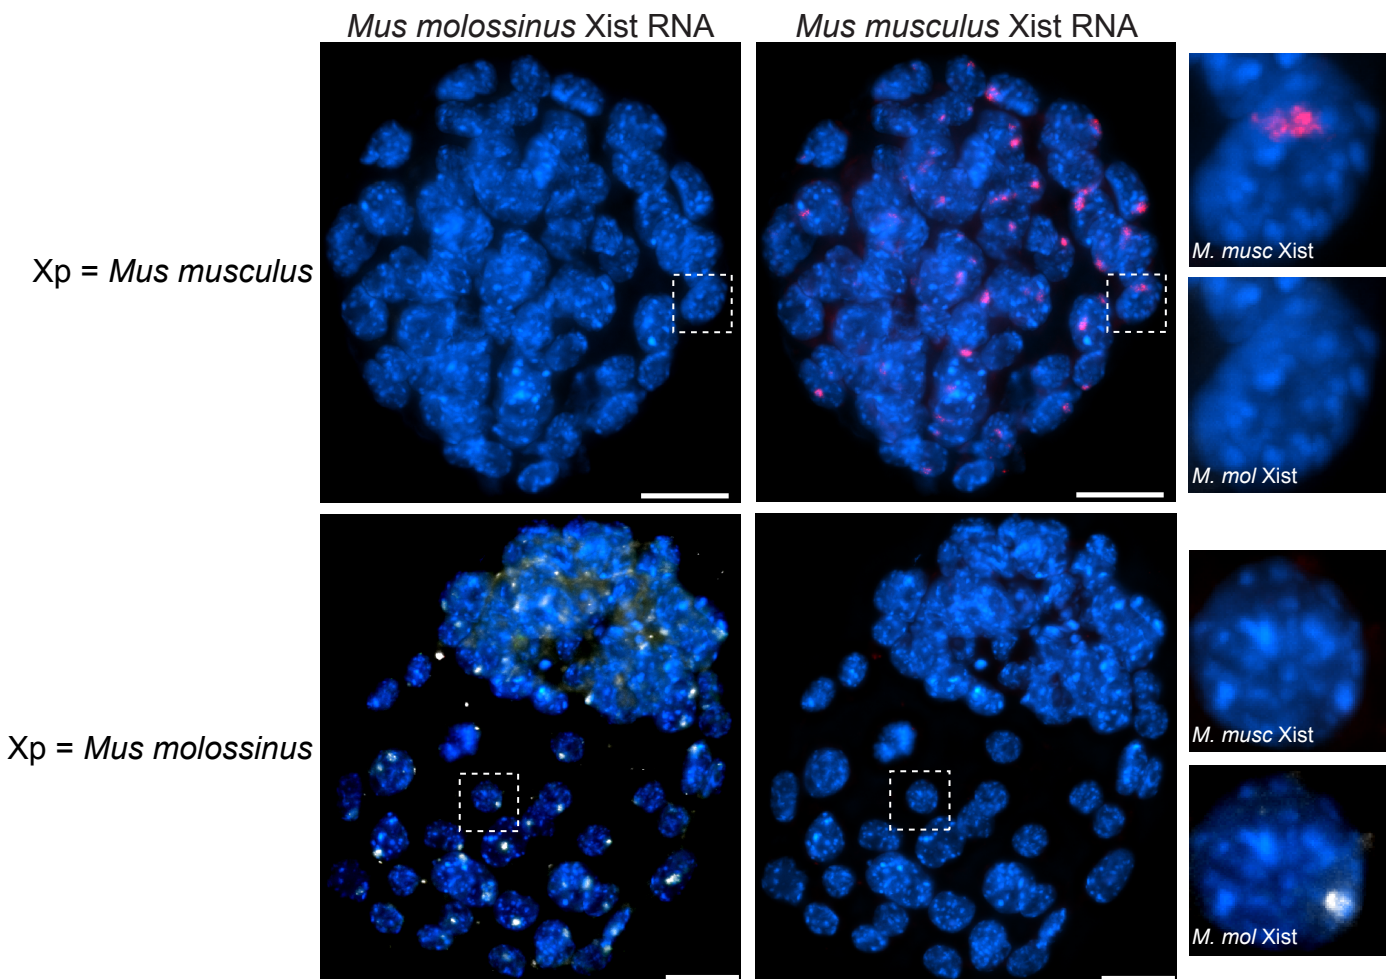

Supplement: supp [file elife-44258-supp-v1.zip]
